# Supplementary material for: Discovery of new nicotinamides as apoptotic VEGFR-2 inhibitors: virtual screening, synthesis, anti-proliferative, immunomodulatory, ADMET, toxicity, and molecular dynamic simulation studies
Source: PubMed Central journal article supplement (PMC9116259; doi:10.1080/14756366.2022.2070744), 2022-05-16
Supplement: IENZ_A_2070744_SM9148.pdf [file IENZ_A_2070744_SM9148.pdf]

**Discovery of new nicotinamides as apoptotic VEGFR-2 inhibitors: virtual screening, synthesis, anti-proliferative, immunomodulatory, ADMET, toxicity, and molecular dynamic simulation studies**

Reda G. Yousef<sup>a</sup>, Albaraa Ibrahim<sup>a</sup>, Mohamed M. Khalifa<sup>a</sup>, Wagdy M. Eldehna<sup>b,c</sup>, Ibraheem M. M. Gobaara<sup>d</sup>, Ahmed B. M. Mehany<sup>d</sup>, Eslam B. Elkaeed<sup>e</sup>, Aisha A. Alsfook<sup>f</sup>, Ahmed M. Metwaly<sup>g,h\*</sup>, Ibrahim. H. Eissa<sup>a\*</sup>,

<sup>a</sup> Pharmaceutical Medicinal Chemistry & Drug Design Department, Faculty of Pharmacy (Boys), Al-Azhar University, Cairo 11884, Egypt.

<sup>b</sup> School of Biotechnology, Badr University in Cairo, Badr City, Cairo 11829, Egypt

<sup>c</sup> Department of Pharmaceutical Chemistry, Faculty of Pharmacy, Kafrelsheikh University, P.O. Box 33516, Kafrelsheikh, Egypt.

<sup>d</sup> Zoology Department, Faculty of Science (Boys), Al-Azhar University, Cairo 11884, Egypt.

<sup>e</sup> Department of Pharmaceutical Sciences, College of Pharmacy, AlMaarefa University, Riyadh 13713, Saudi Arabia.

<sup>f</sup> Department of Pharmaceutical Sciences, College of Pharmacy, Princess Nourah bint Abdulrahman University, P.O. Box 84428, Riyadh 11671, Saudi Arabia.

<sup>g</sup> Pharmacognosy and Medicinal Plants Department, Faculty of Pharmacy (Boys), Al-Azhar University, Cairo 11884, Egypt.

<sup>h</sup> Biopharmaceutical Products Research Department, Genetic Engineering and Biotechnology Research Institute, City of Scientific Research and Technological Applications (SRTA-City), Alexandria, Egypt

**\*Corresponding authors:**

**Ibrahim H. Eissa**

Medicinal Chemistry Department, Faculty of Pharmacy (Boys), Al-Azhar University, Cairo 11884, Egypt. **Email:** [Ibrahimeissa@azhar.edu.eg](mailto:Ibrahimeissa@azhar.edu.eg)

**Ahmed M. Metwaly**

Pharmacognosy and Medicinal Plants Department, Faculty of Pharmacy (Boys), Al-Azhar University, Cairo 11884, Egypt. **Email:** [ametwaly@azhar.edu.eg](mailto:ametwaly@azhar.edu.eg)

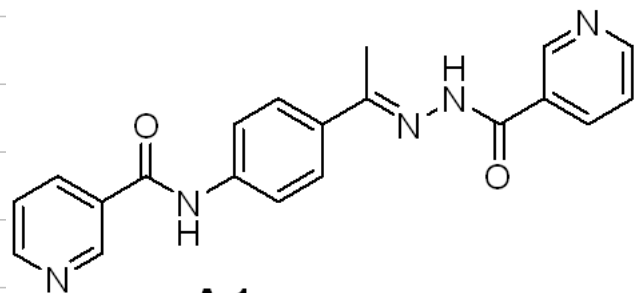

A-1

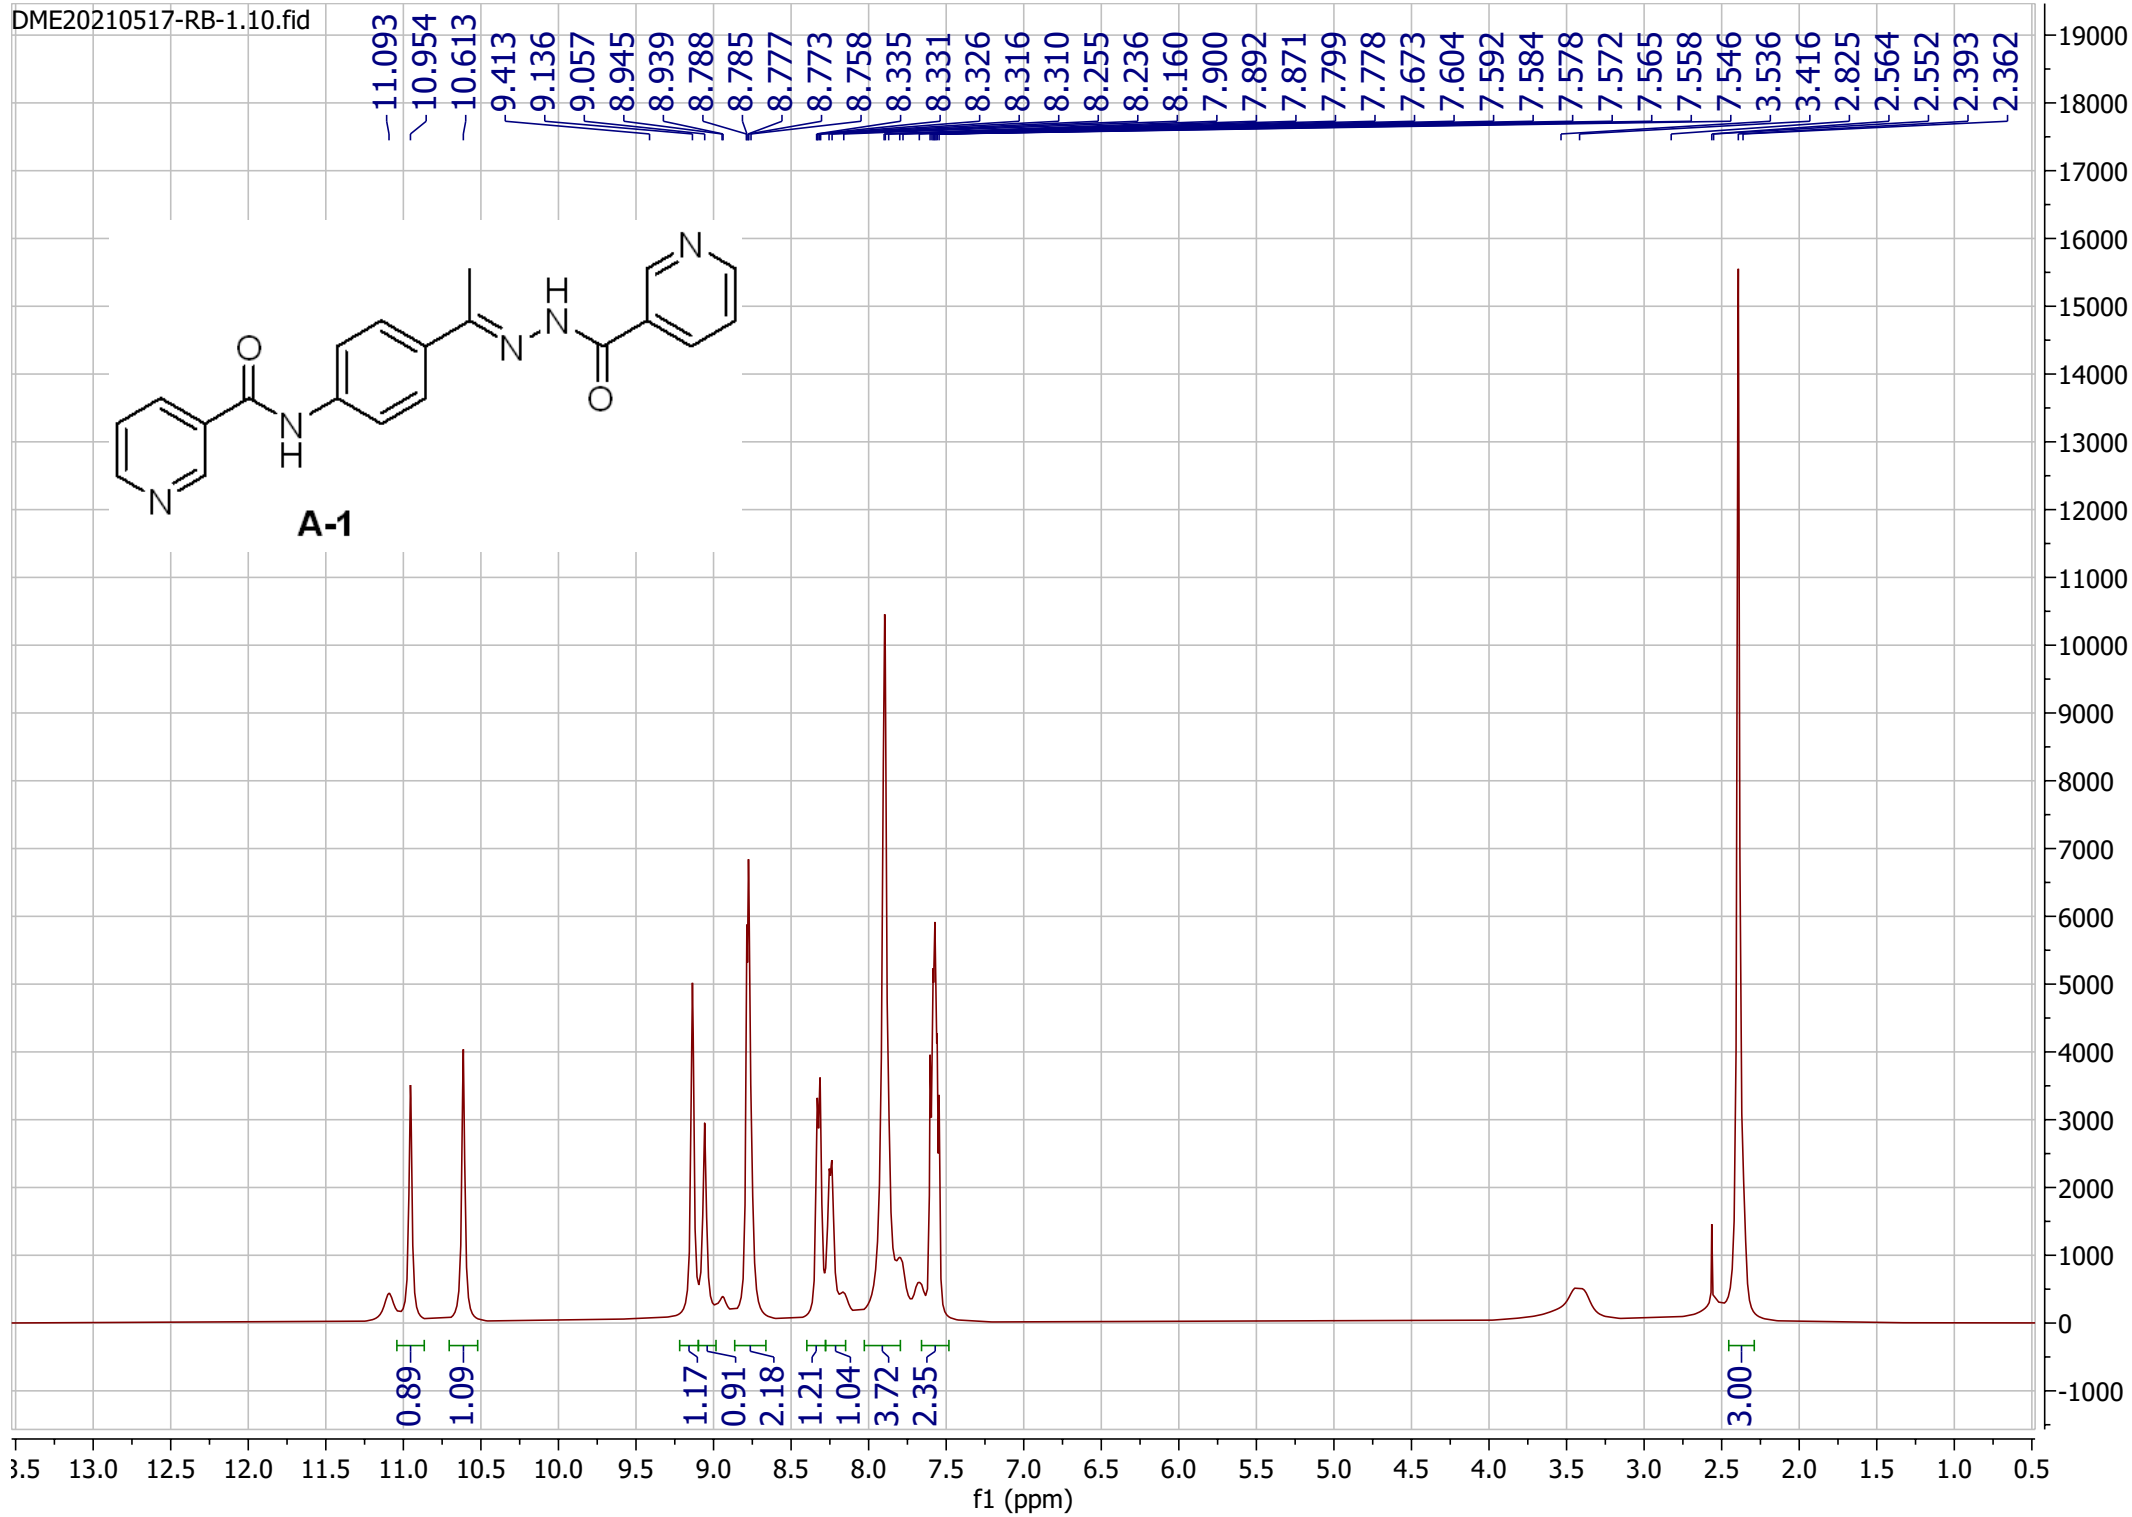

Wagdy eldehna -RB4-carbon-Es

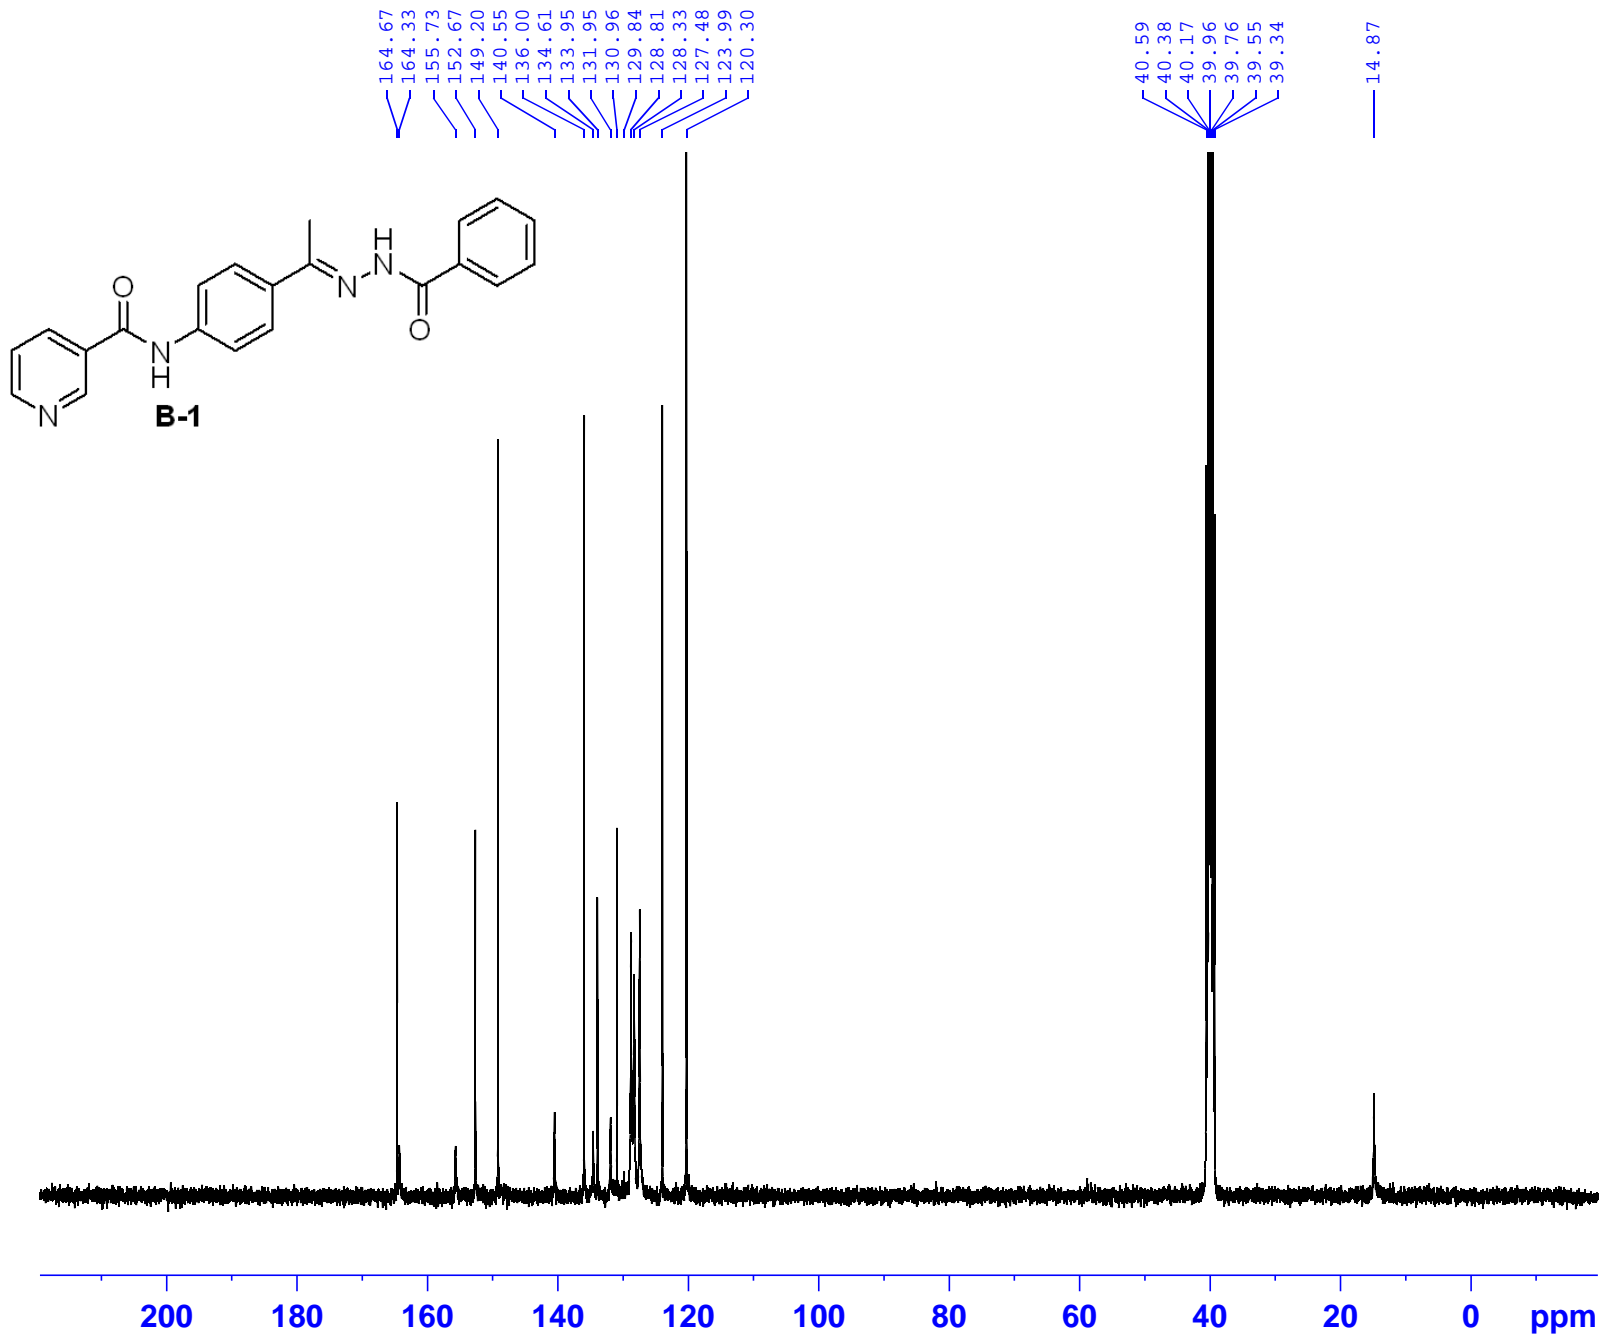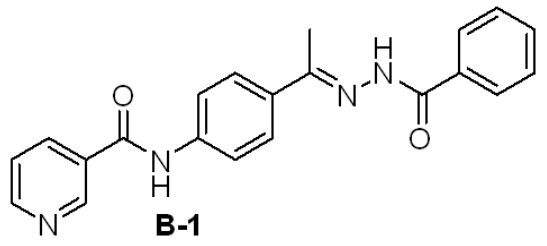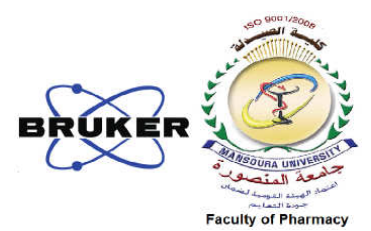

Current Data Parameters  
 NAME Wagdy eldehna -RB4-carbon-Es  
 EXPNO 10  
 PROCNO 1

F2 - Acquisition Parameters  
 Date\_ 20210627  
 Time 19.58 h  
 INSTRUM spect  
 PROBHD Z108618\_0945 (  
 PULPROG zgpg30  
 TD 65536  
 SOLVENT DMSO  
 NS 2200  
 DS 4  
 SWH 24038.461 Hz  
 FIDRES 0.733596 Hz  
 AQ 1.3631488 sec  
 RG 197.77  
 DW 20.800 usec  
 DE 6.50 usec  
 TE 297.5 K  
 D1 2.00000000 sec  
 D11 0.03000000 sec  
 TD0 1  
 SFO1 100.6404331 MHz  
 NUC1 13C  
 P1 10.00 usec  
 PLW1 47.00000000 W  
 SFO2 400.2016008 MHz  
 NUC2 1H  
 CPDPRG[2] waltz16  
 PCPD2 90.00 usec  
 PLW2 13.00000000 W  
 PLW12 0.29249999 W  
 PLW13 0.14713000 W

F2 - Processing parameters  
 SI 32768  
 SF 100.6303700 MHz  
 WDW EM  
 SSB 0  
 LB 1.00 Hz  
 GB 0  
 PC 1.40

Wagdy eldehna -RB4-carbon-Es

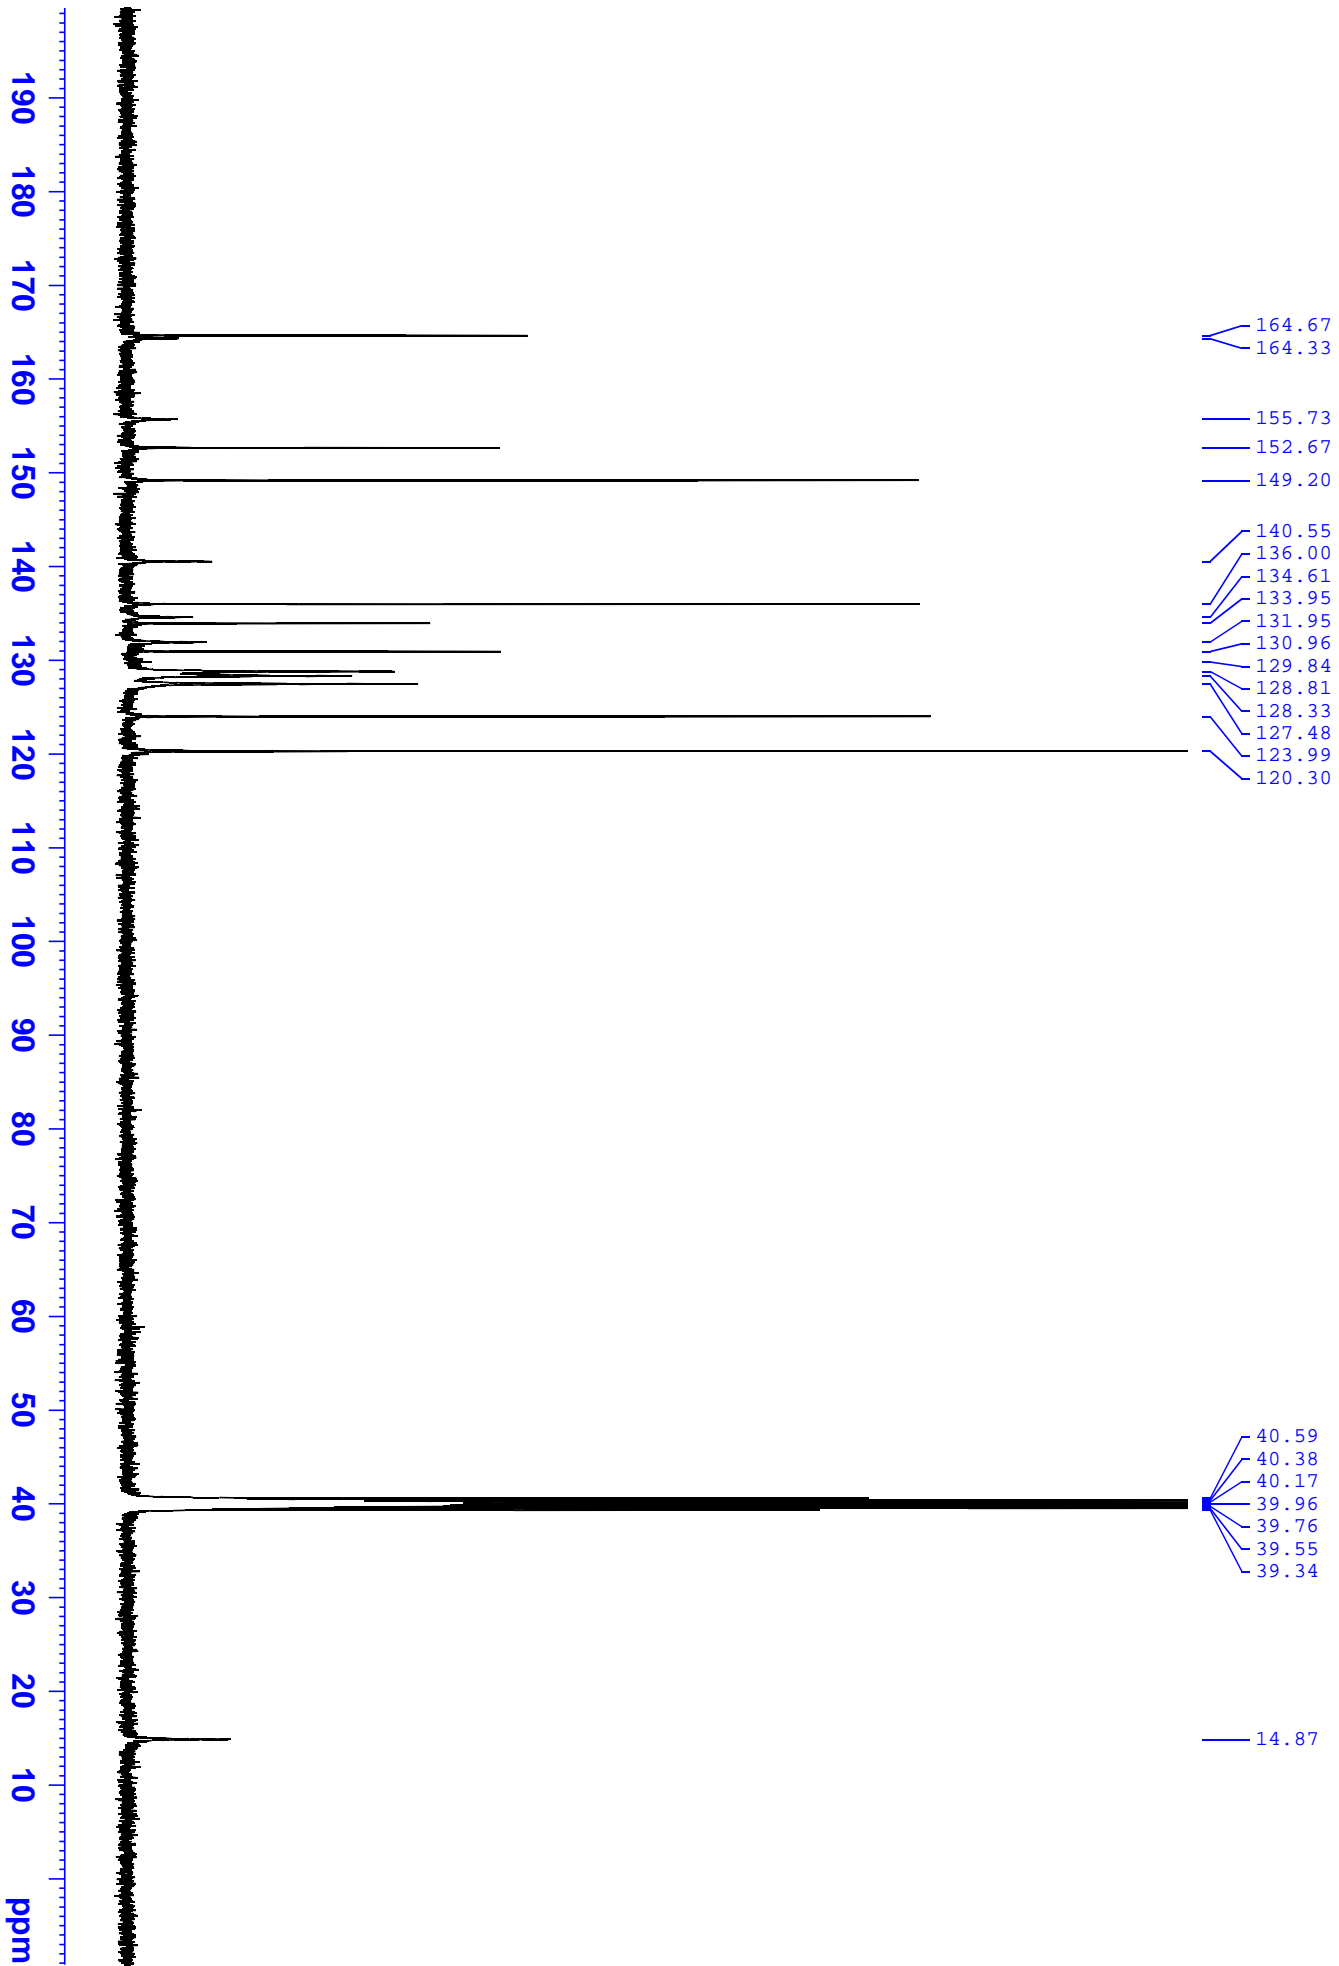

Wagdy eldehna -RB4-carbon-Es

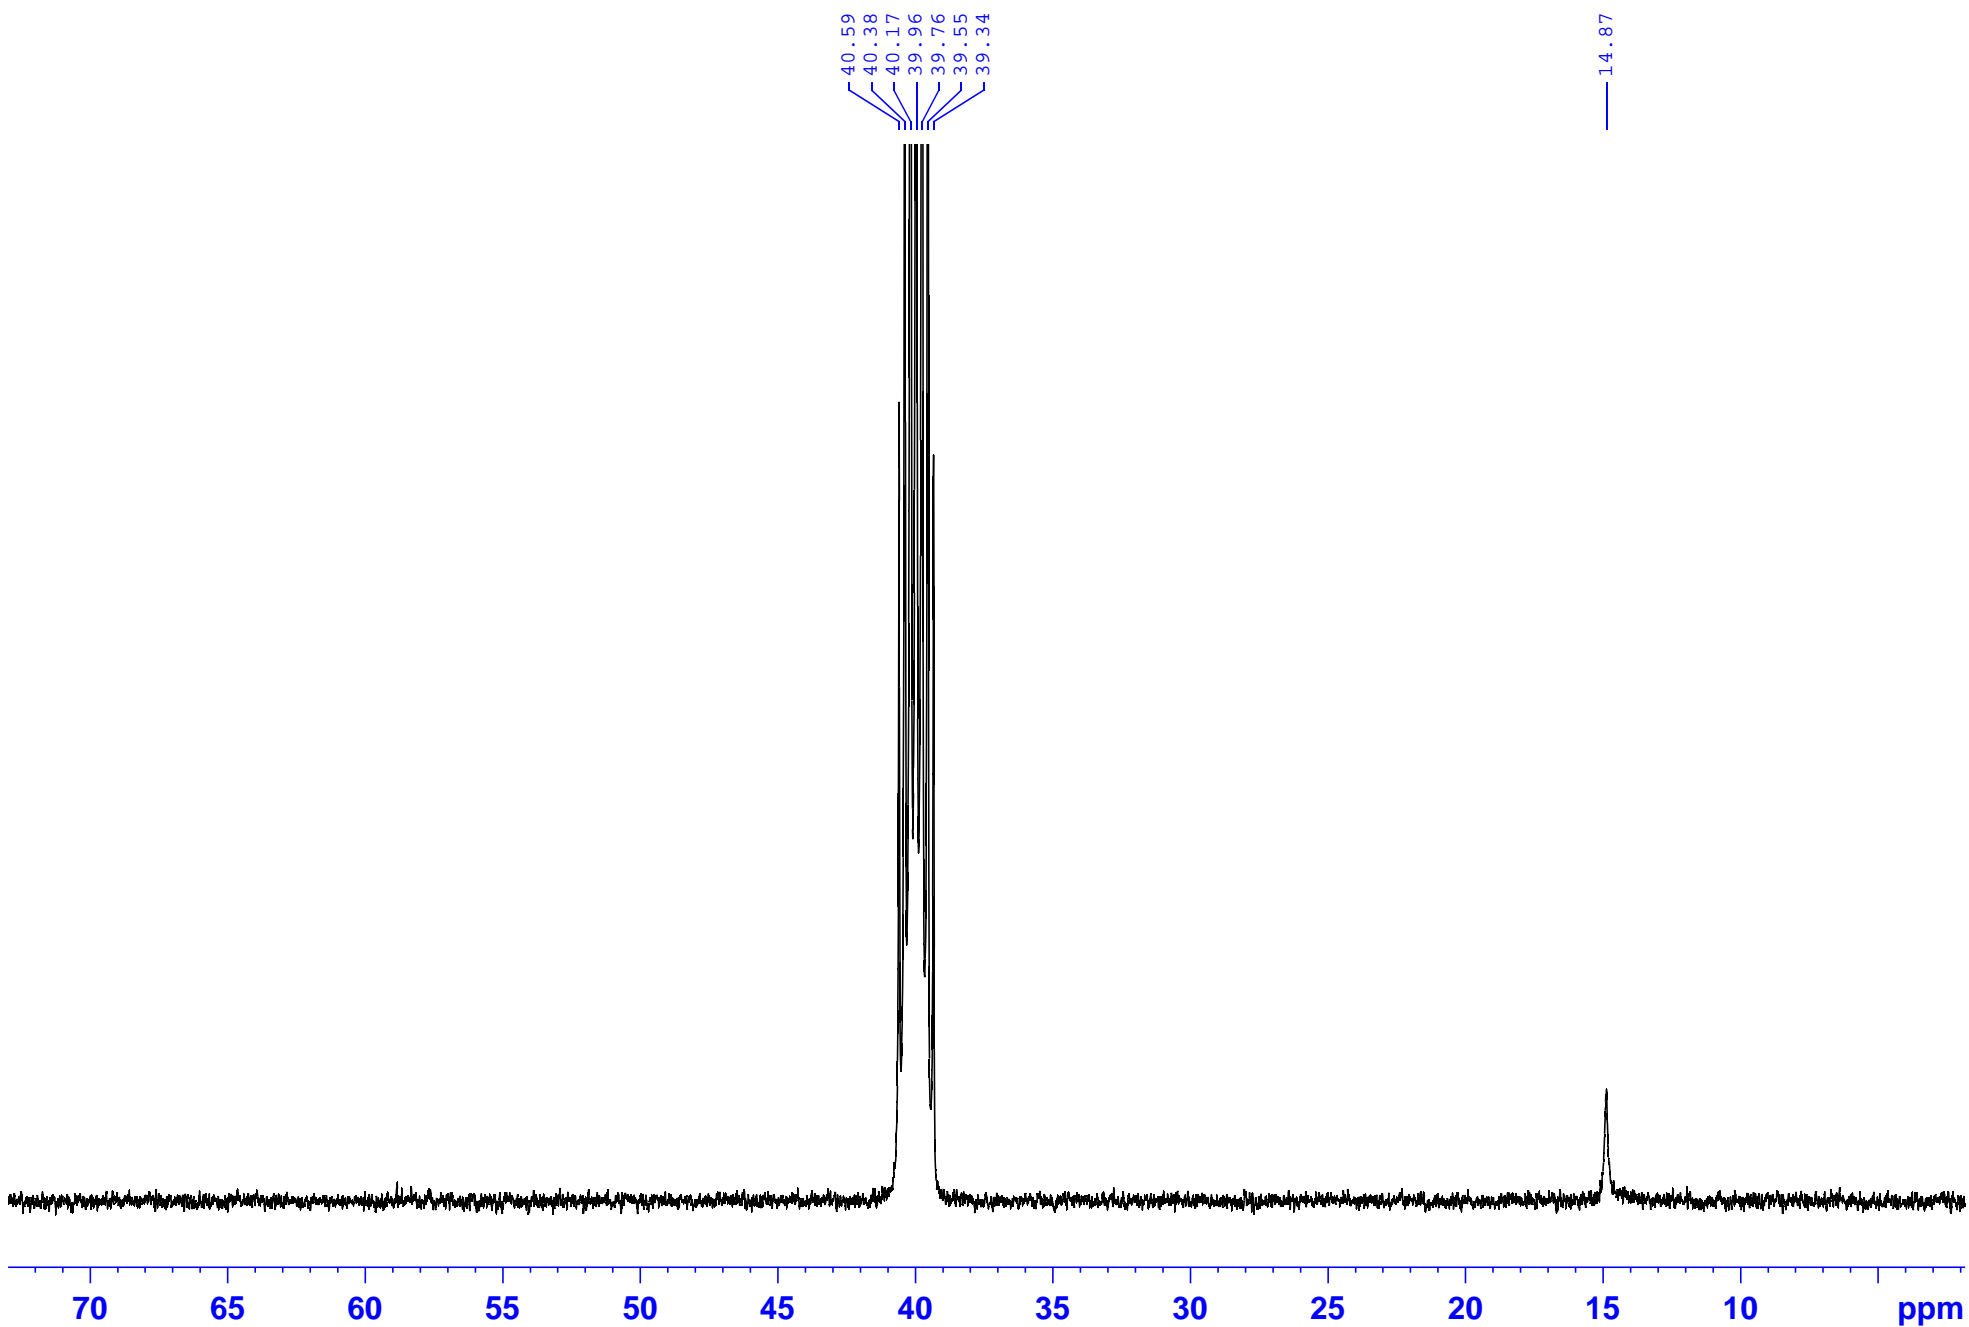

Wagdy eldehna -RB4-carbon-Es

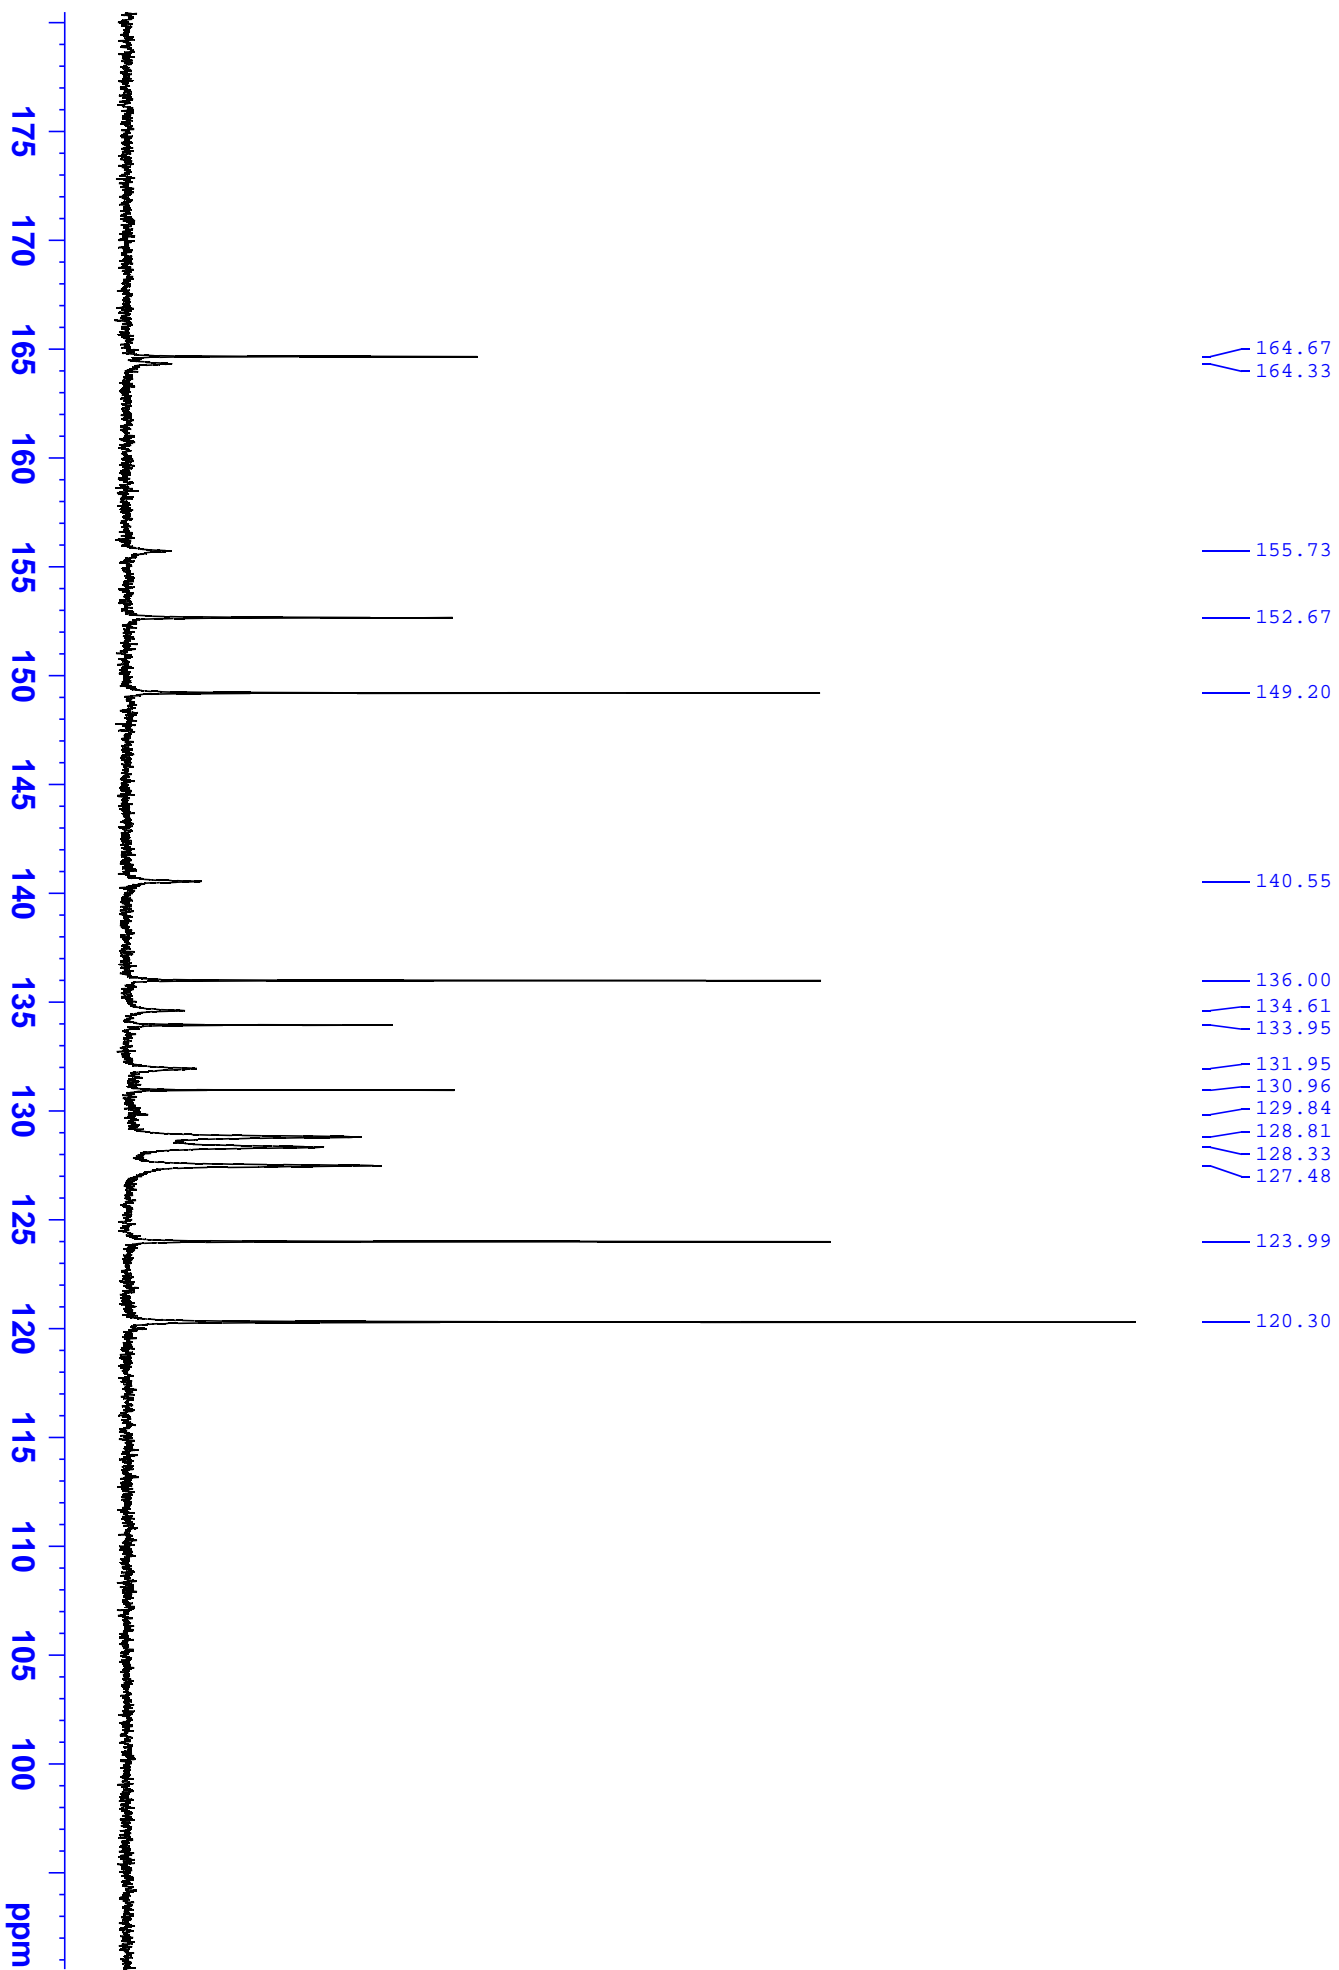

Wagdy El Dahna-RB 4-DMSO-Hnmr-A

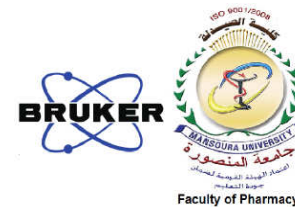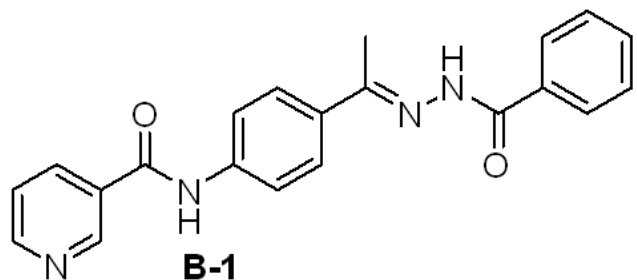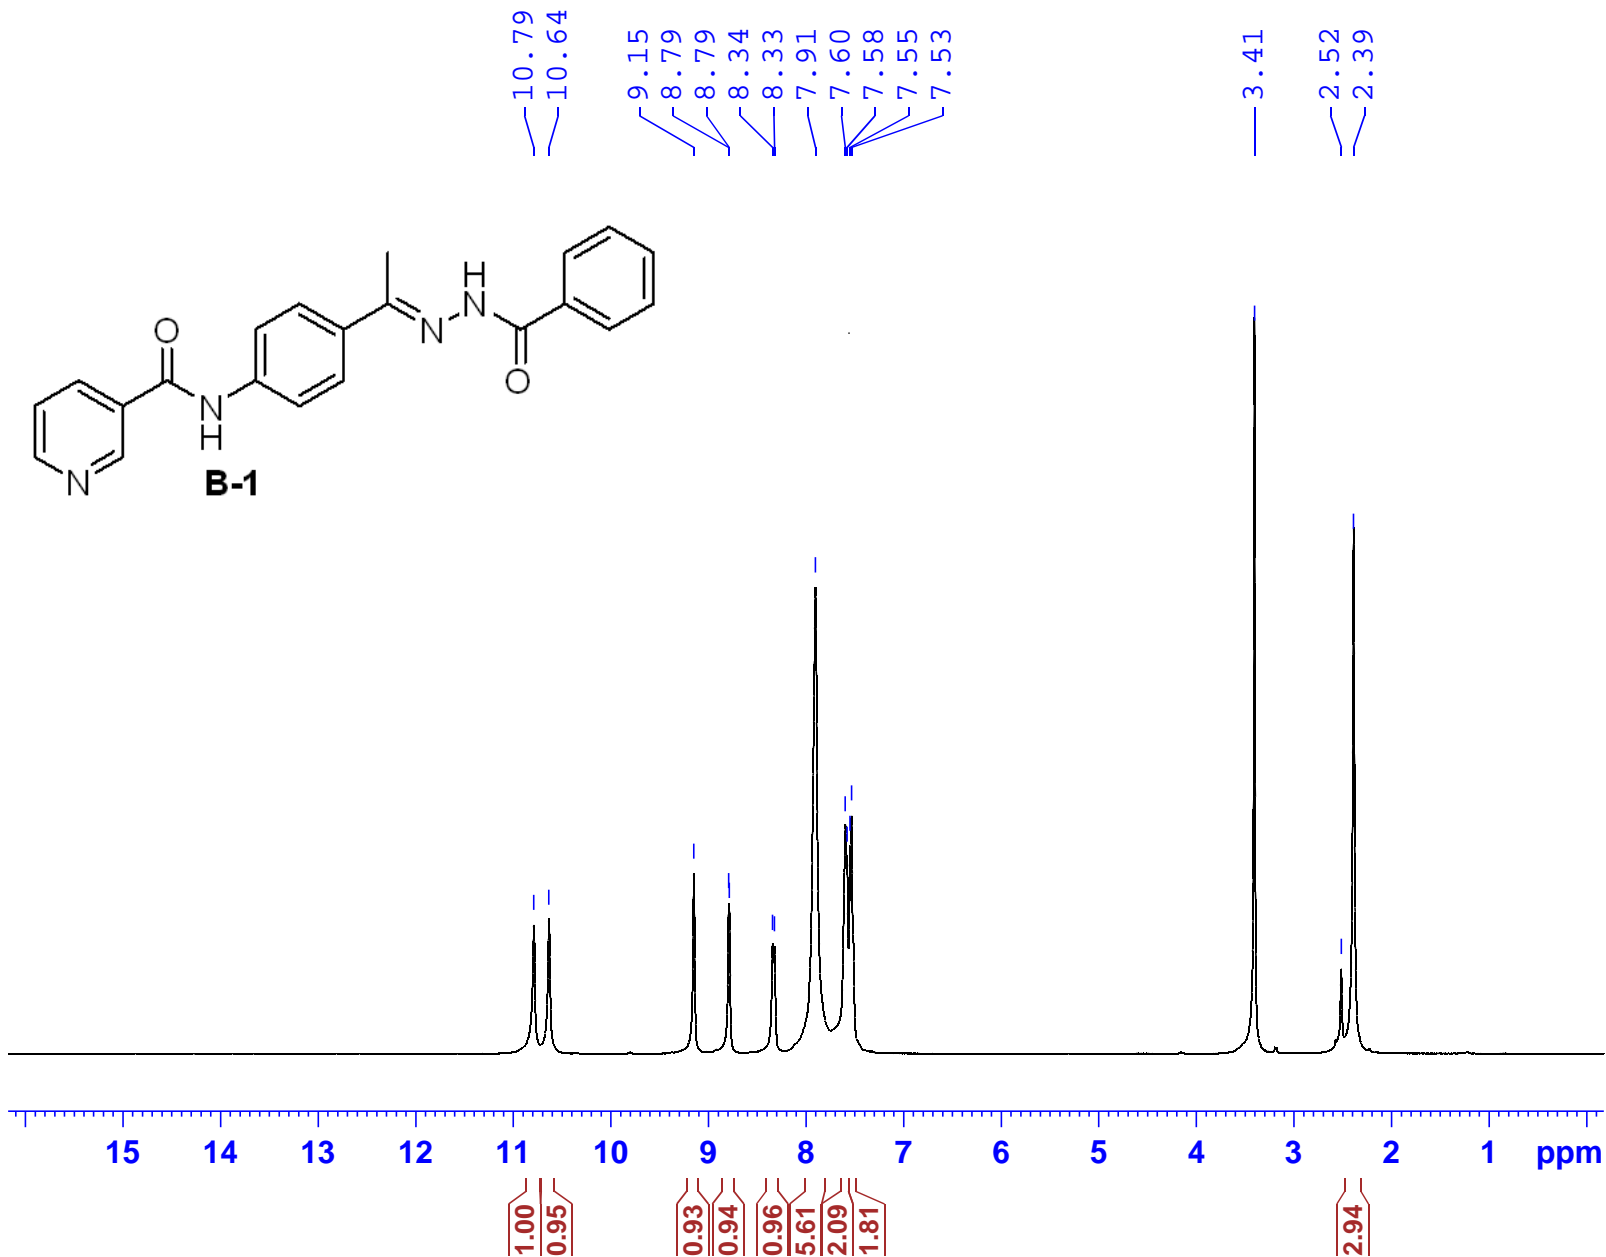

Current Data Parameters  
NAME Wagdy El Dahna-RB  
EXPNO 10  
PROCNO 1

F2 - Acquisition Parameters  
Date\_ 20210610  
Time 11.19 h  
INSTRUM spect  
PROBHD Z108618\_0945 (  
PULPROG zg30  
TD 65536  
SOLVENT DMSO  
NS 16  
DS 2  
SWH 8012.820 Hz  
FIDRES 0.244532 Hz  
AQ 4.0894465 sec  
RG 88.92  
DW 62.400 usec  
DE 6.50 usec  
TE 294.5 K  
D1 1.00000000 sec  
TD0 1  
SF01 400.2024712 MHz  
NUC1 1H  
P1 13.50 usec  
PLW1 13.00000000 W

F2 - Processing parameters  
SI 65536  
SF 400.2000000 MHz  
WDW EM  
SSB 0  
LB 0.30 Hz  
GB 0  
PC 1.00

Wagdy El Dahna-RB 4-DMSO-Hnmr-A

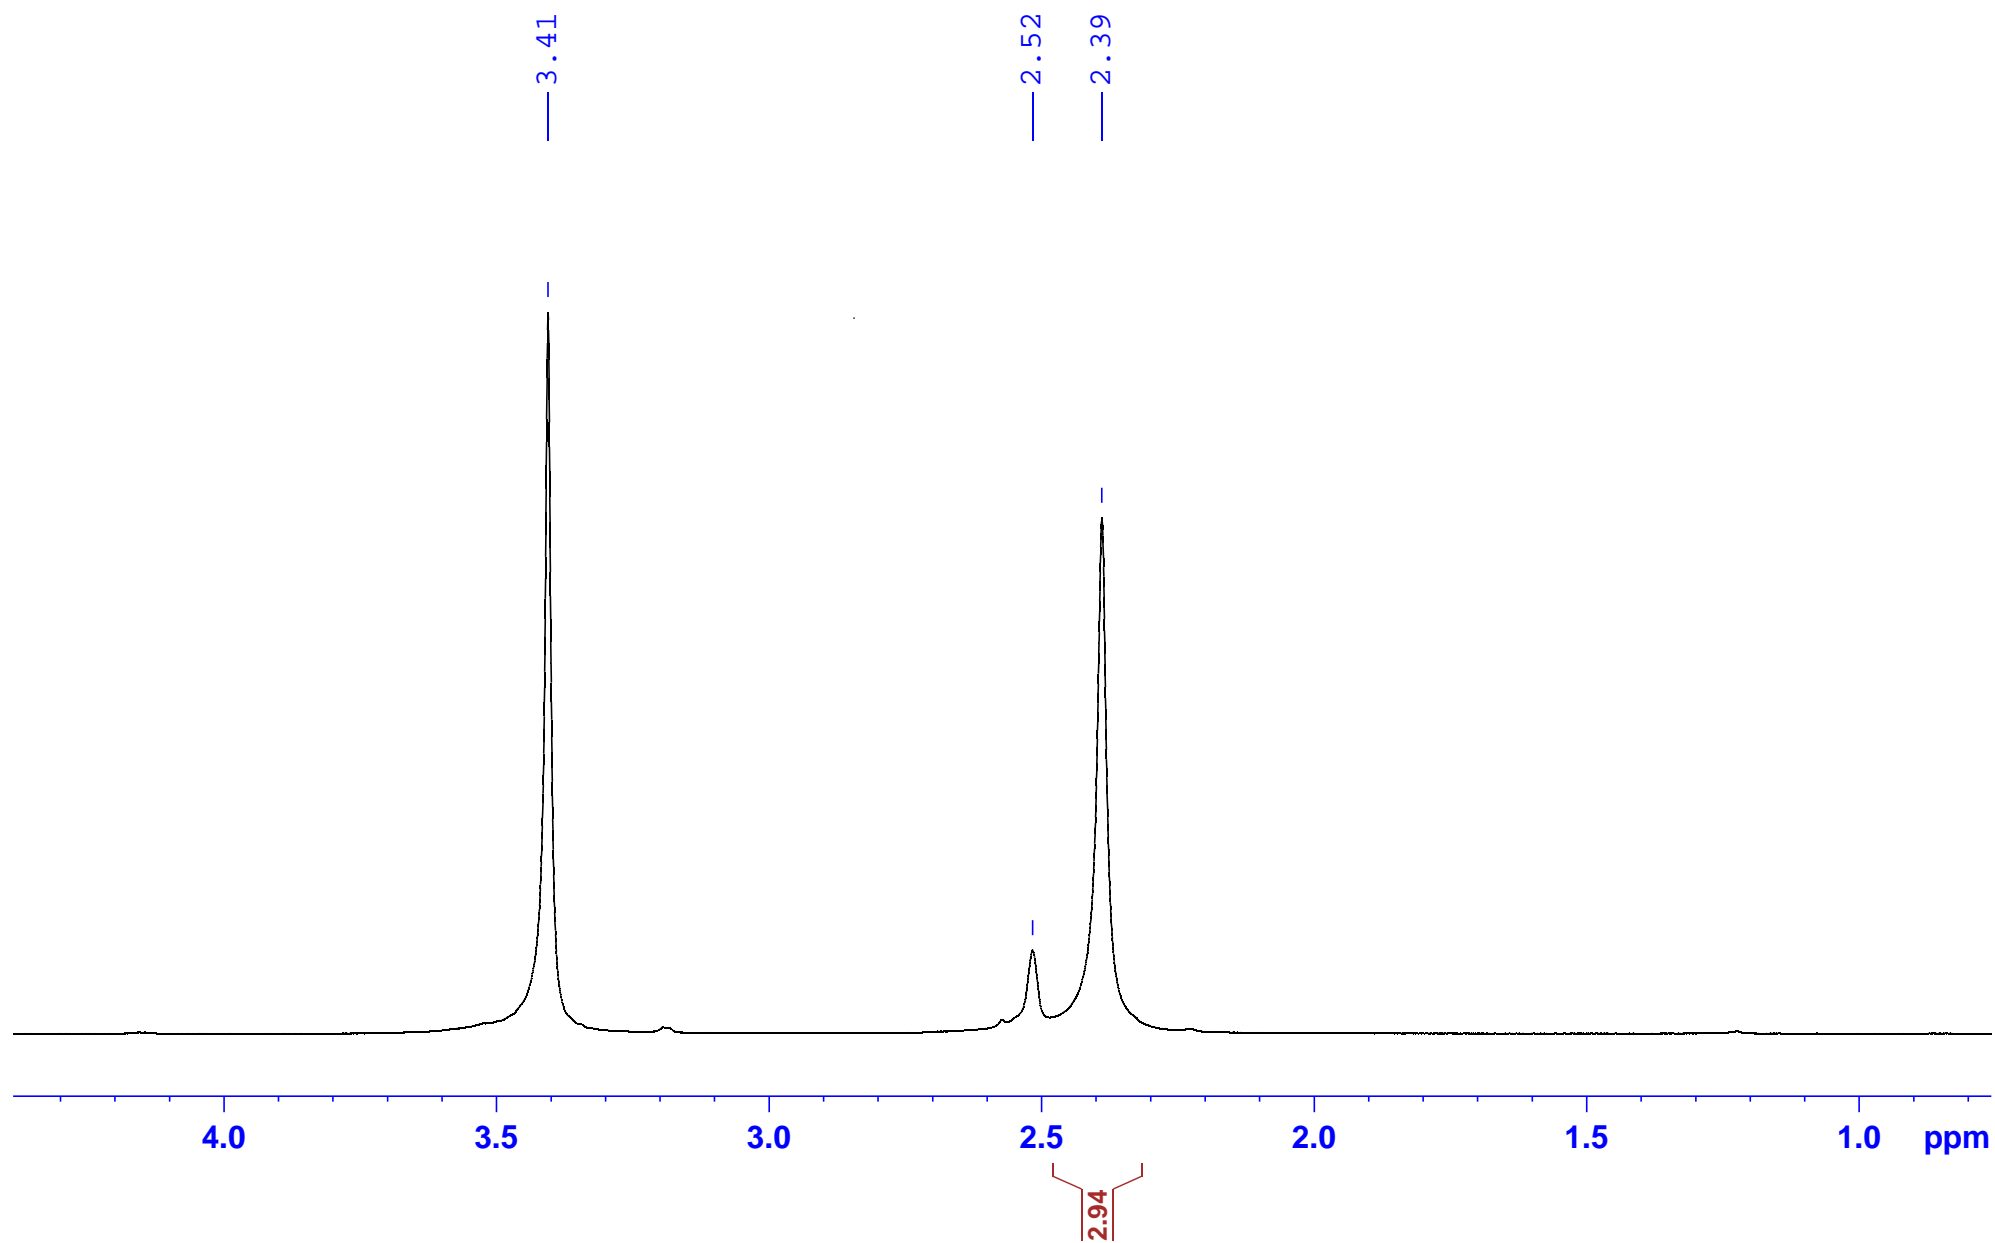



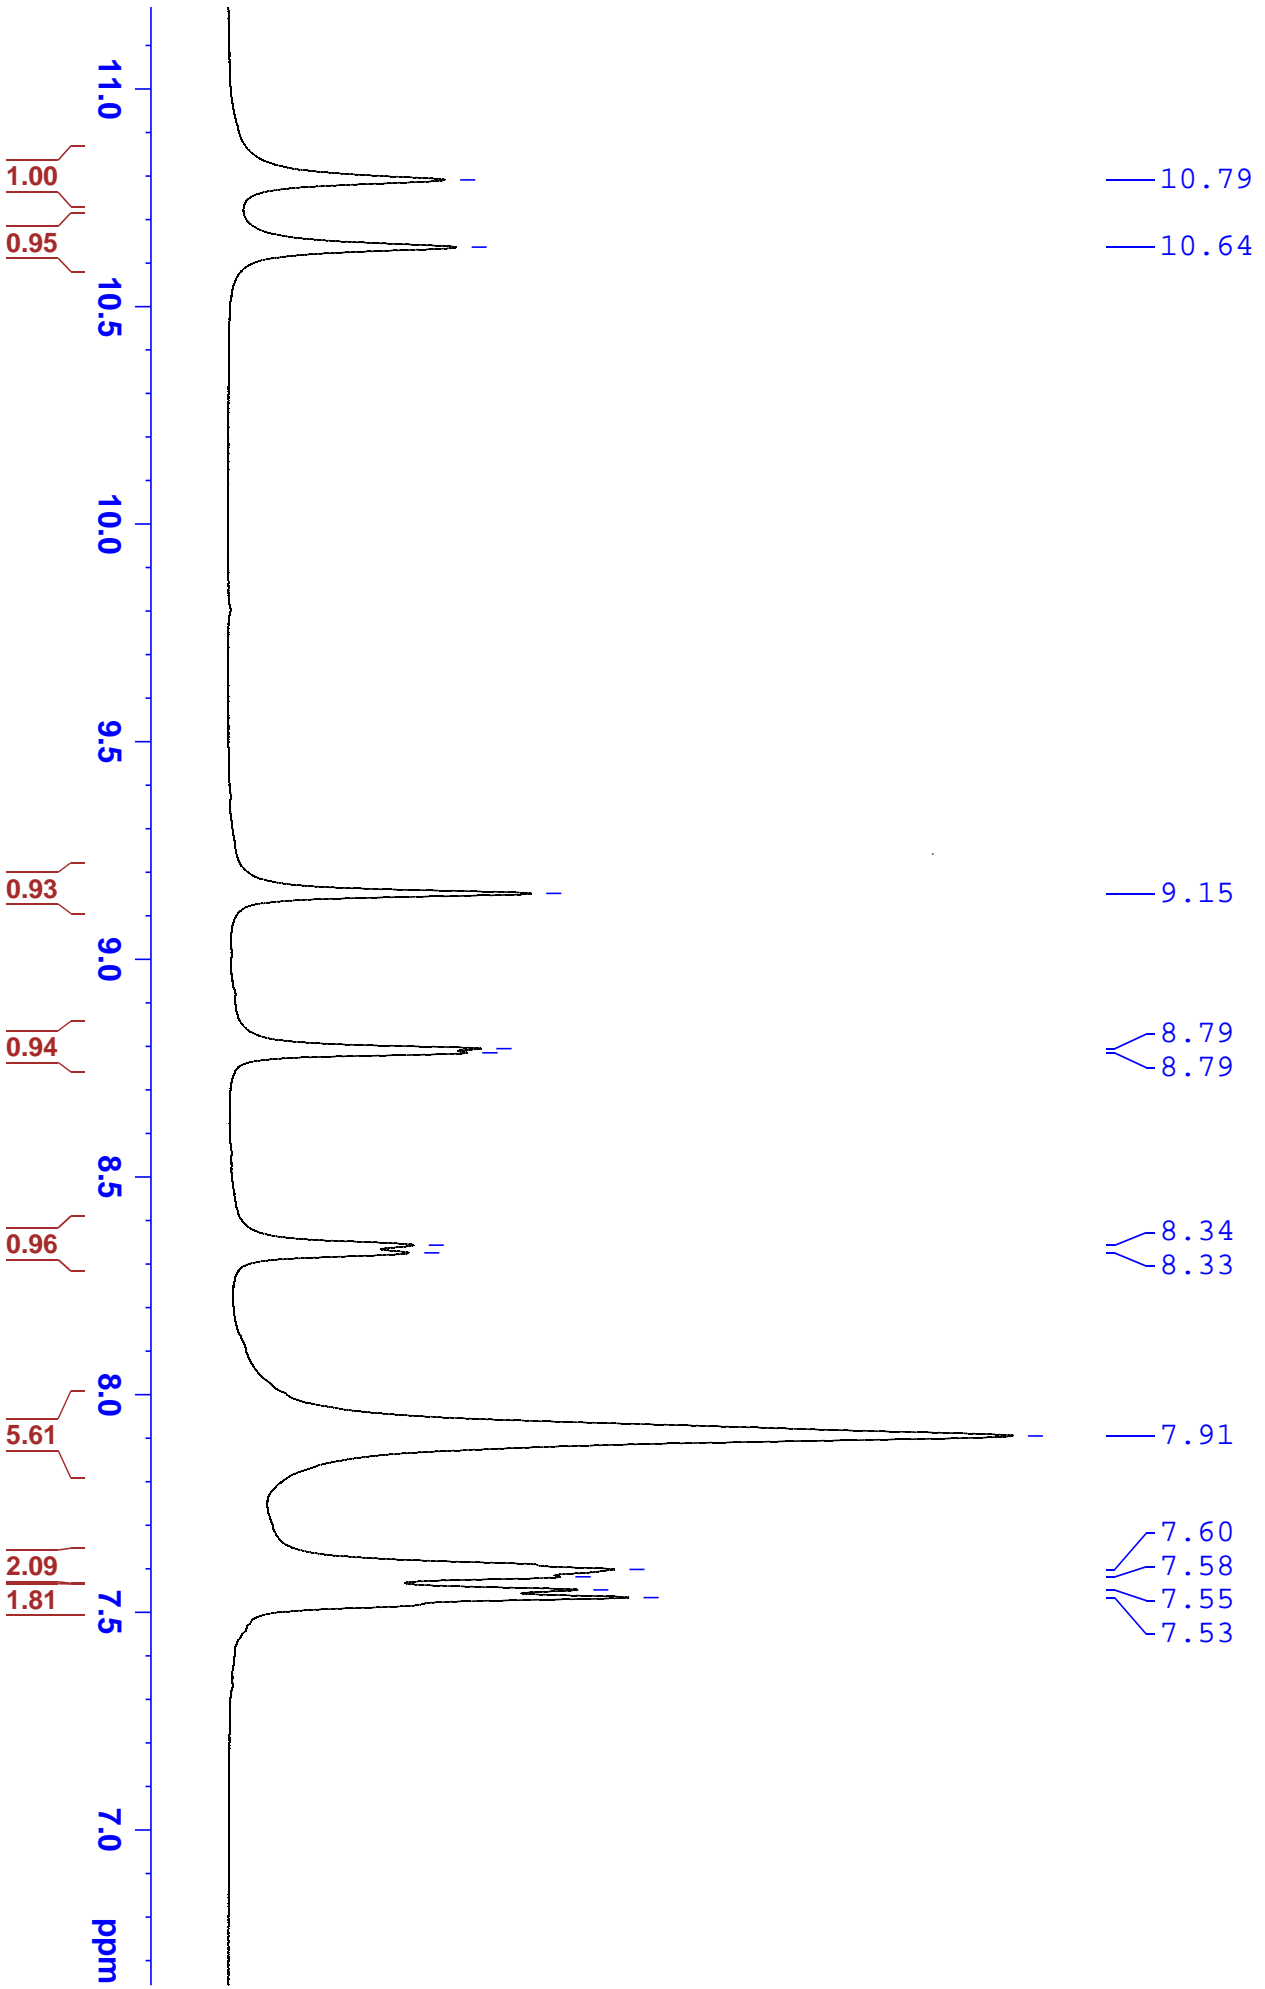

Wagdy eldehna -RB5-carbon-Es

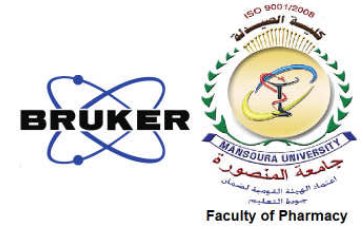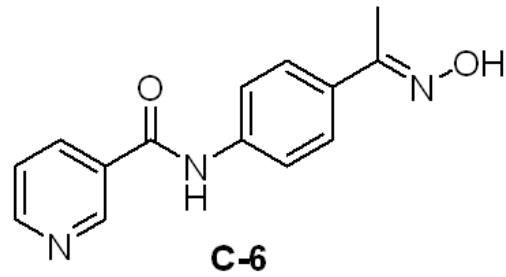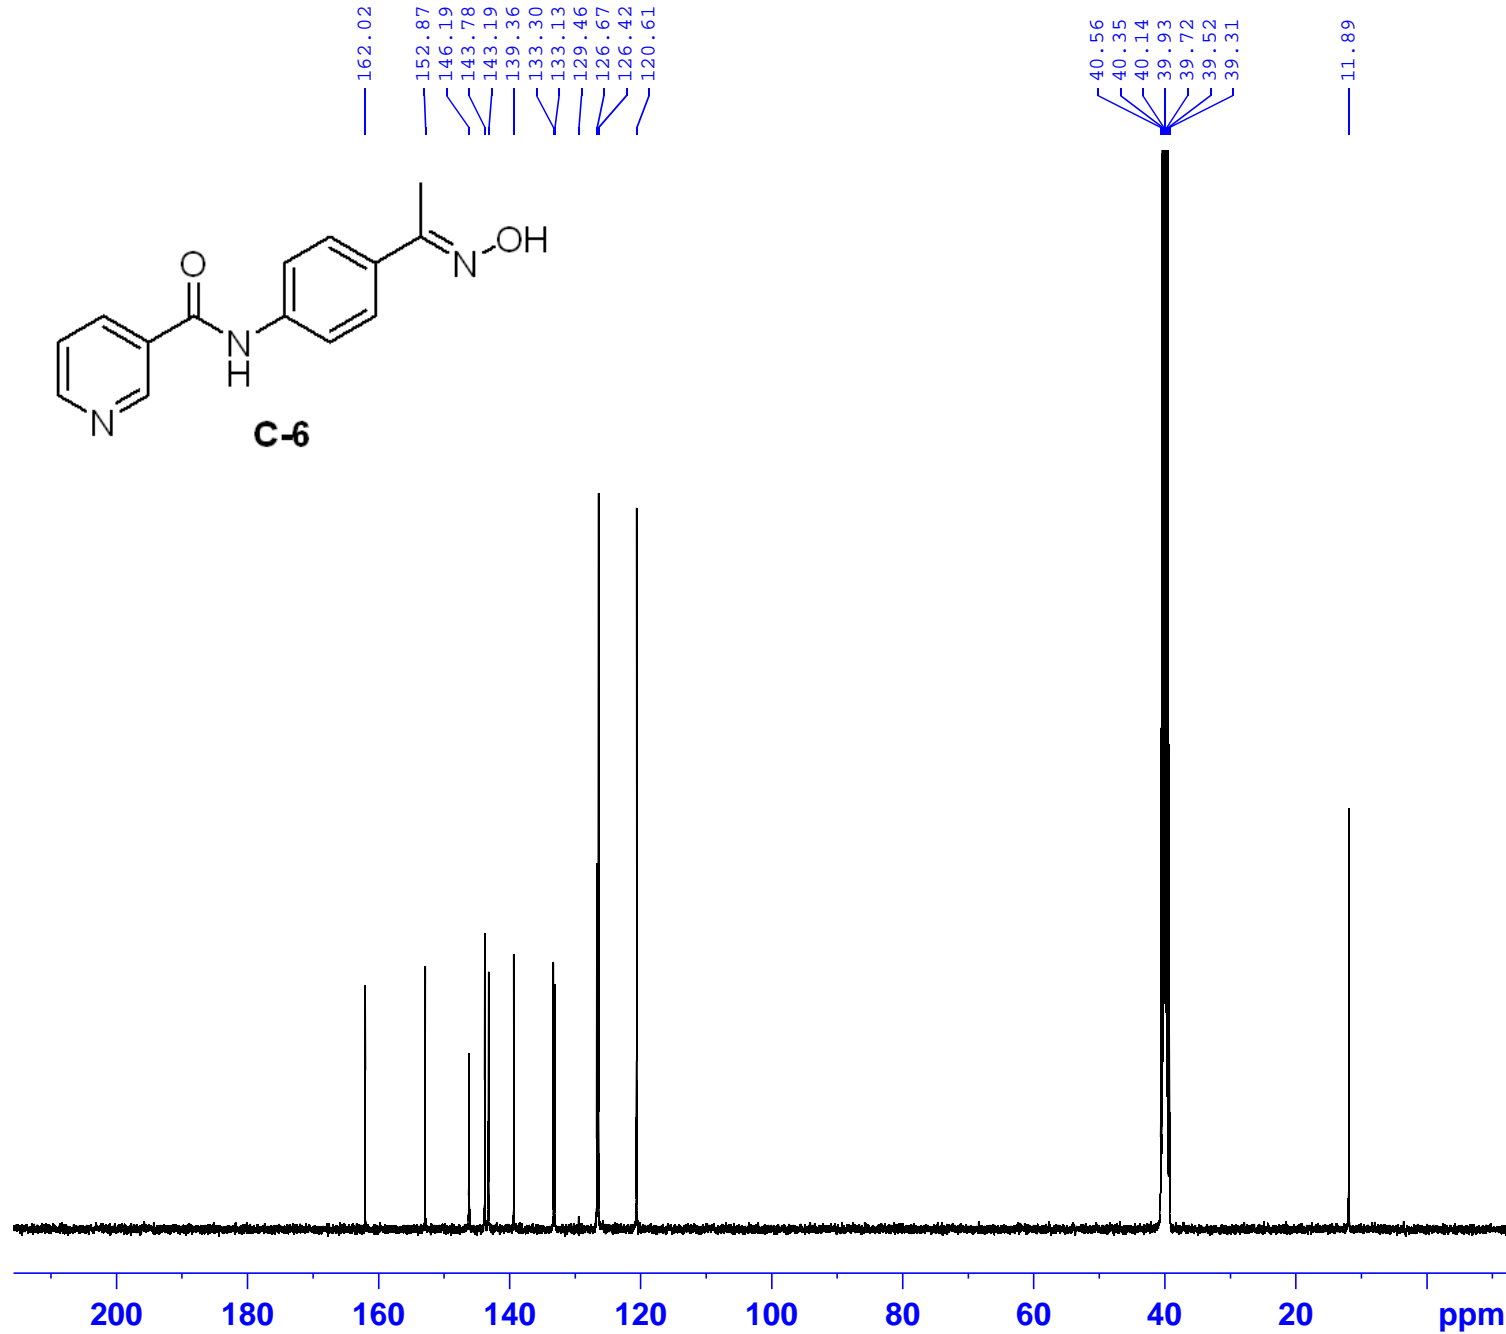

Current Data Parameters  
 NAME Wagdy eldehna -RB5-carbon-Es  
 EXPNO 10  
 PROCNO 1

F2 - Acquisition Parameters  
 Date\_ 20210628  
 Time 6.44 h  
 INSTRUM spect  
 PROBHD Z108618\_0945 (  
 PULPROG zgpg30  
 TD 65536  
 SOLVENT DMSO  
 NS 2200  
 DS 4  
 SWH 24038.461 Hz  
 FIDRES 0.733596 Hz  
 AQ 1.3631488 sec  
 RG 197.77  
 DW 20.800 usec  
 DE 6.50 usec  
 TE 297.4 K  
 D1 2.00000000 sec  
 D11 0.03000000 sec  
 TD0 1  
 SFO1 100.6404331 MHz  
 NUC1 13C  
 P1 10.00 usec  
 PLW1 47.00000000 W  
 SFO2 400.2016008 MHz  
 NUC2 1H  
 CPDPRG[2] waltz16  
 PCPD2 90.00 usec  
 PLW2 13.00000000 W  
 PLW12 0.29249999 W  
 PLW13 0.14713000 W

F2 - Processing parameters  
 SI 32768  
 SF 100.6303700 MHz  
 WDW EM  
 SSB 0  
 LB 1.00 Hz  
 GB 0  
 PC 1.40

Wagdy eldehna -RB5-carbon-Es

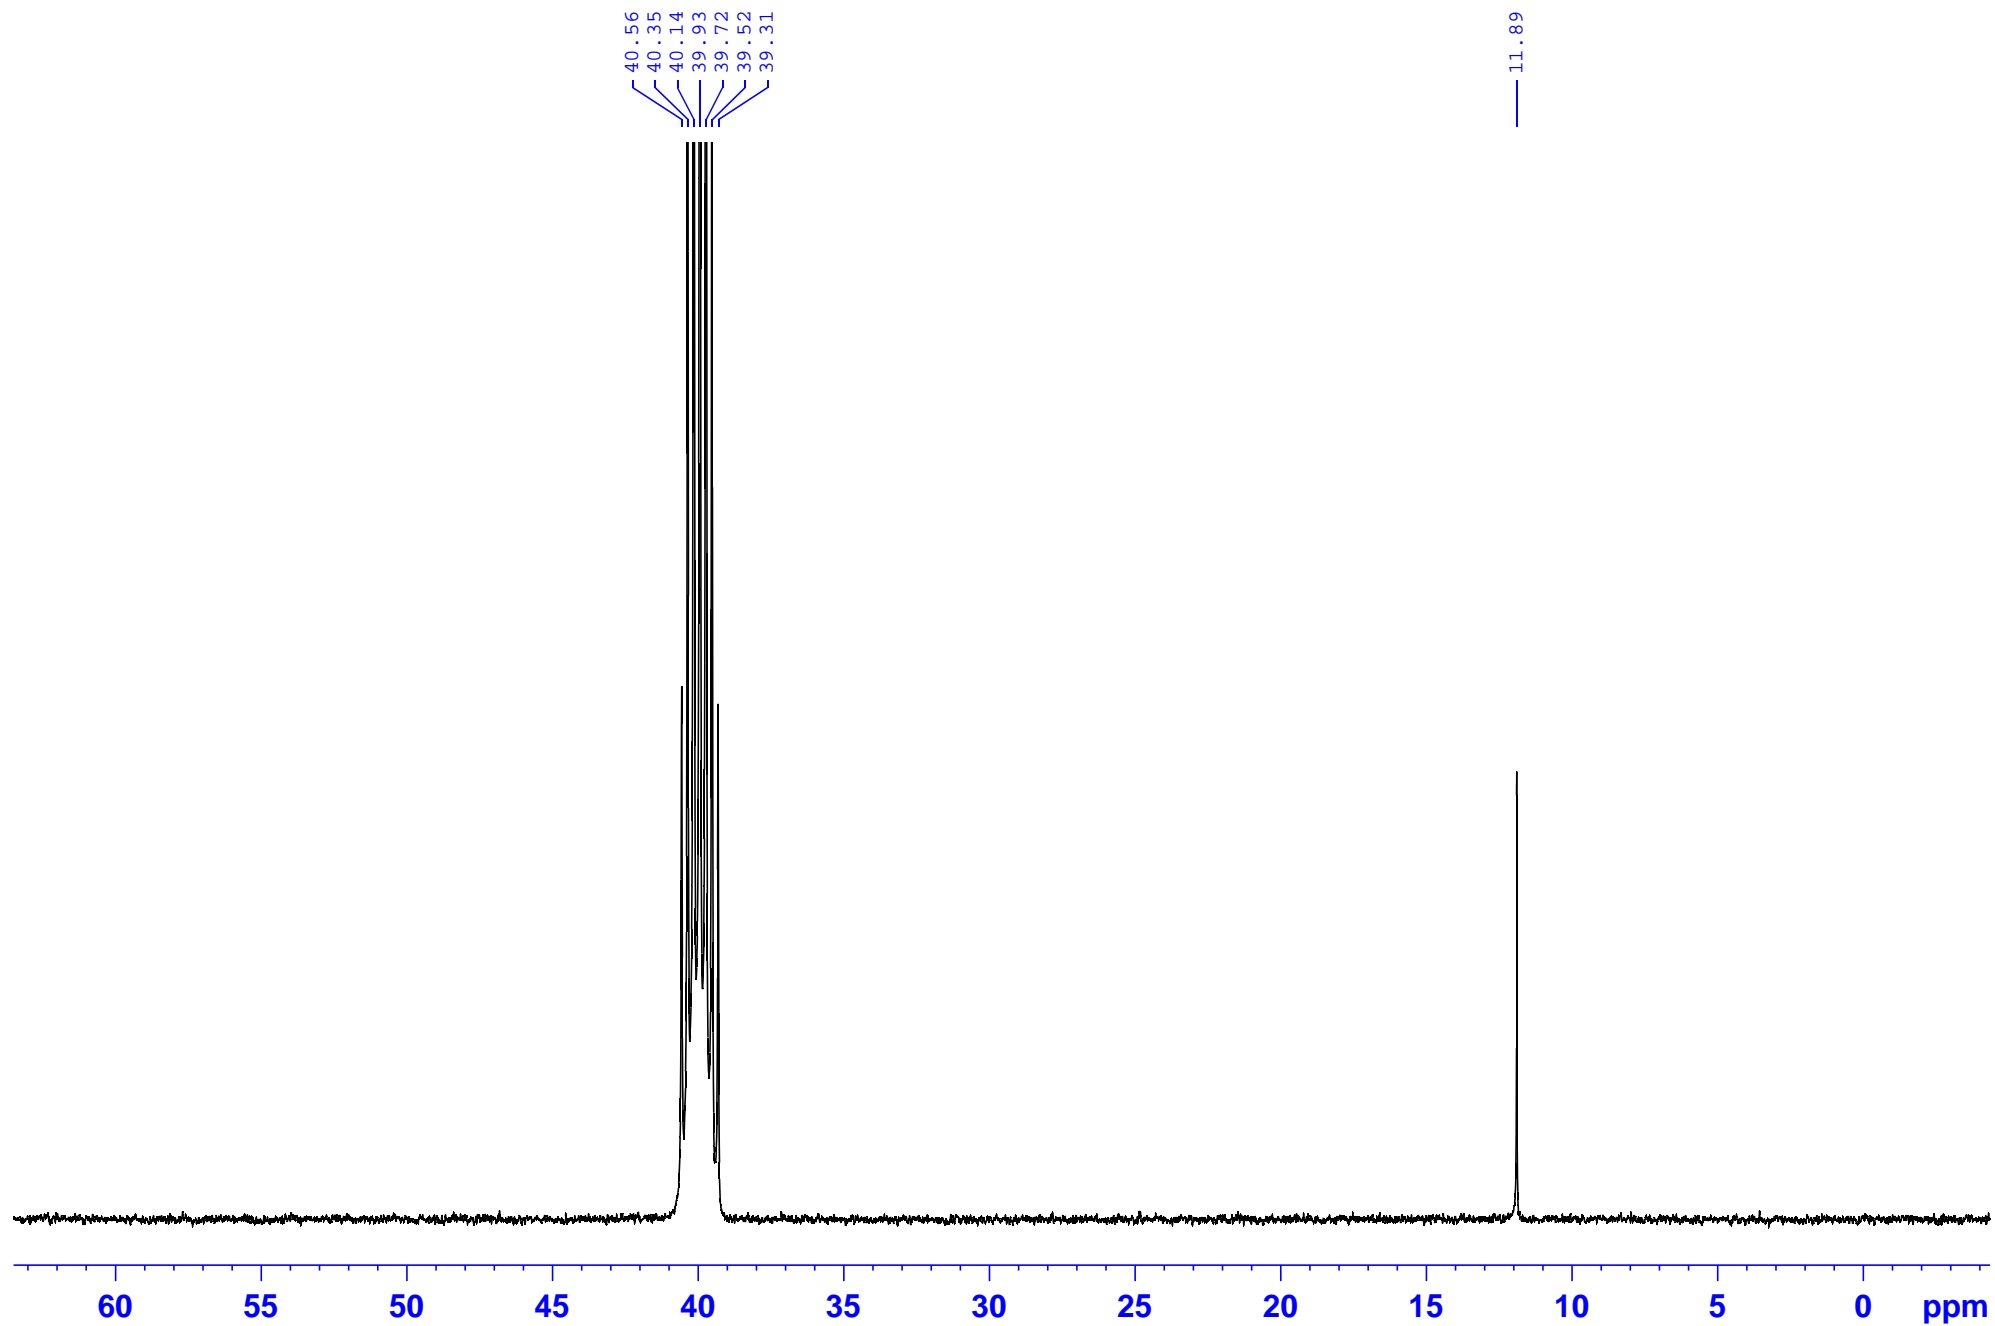

Wagdy eldehna -RB5-carbon-Es

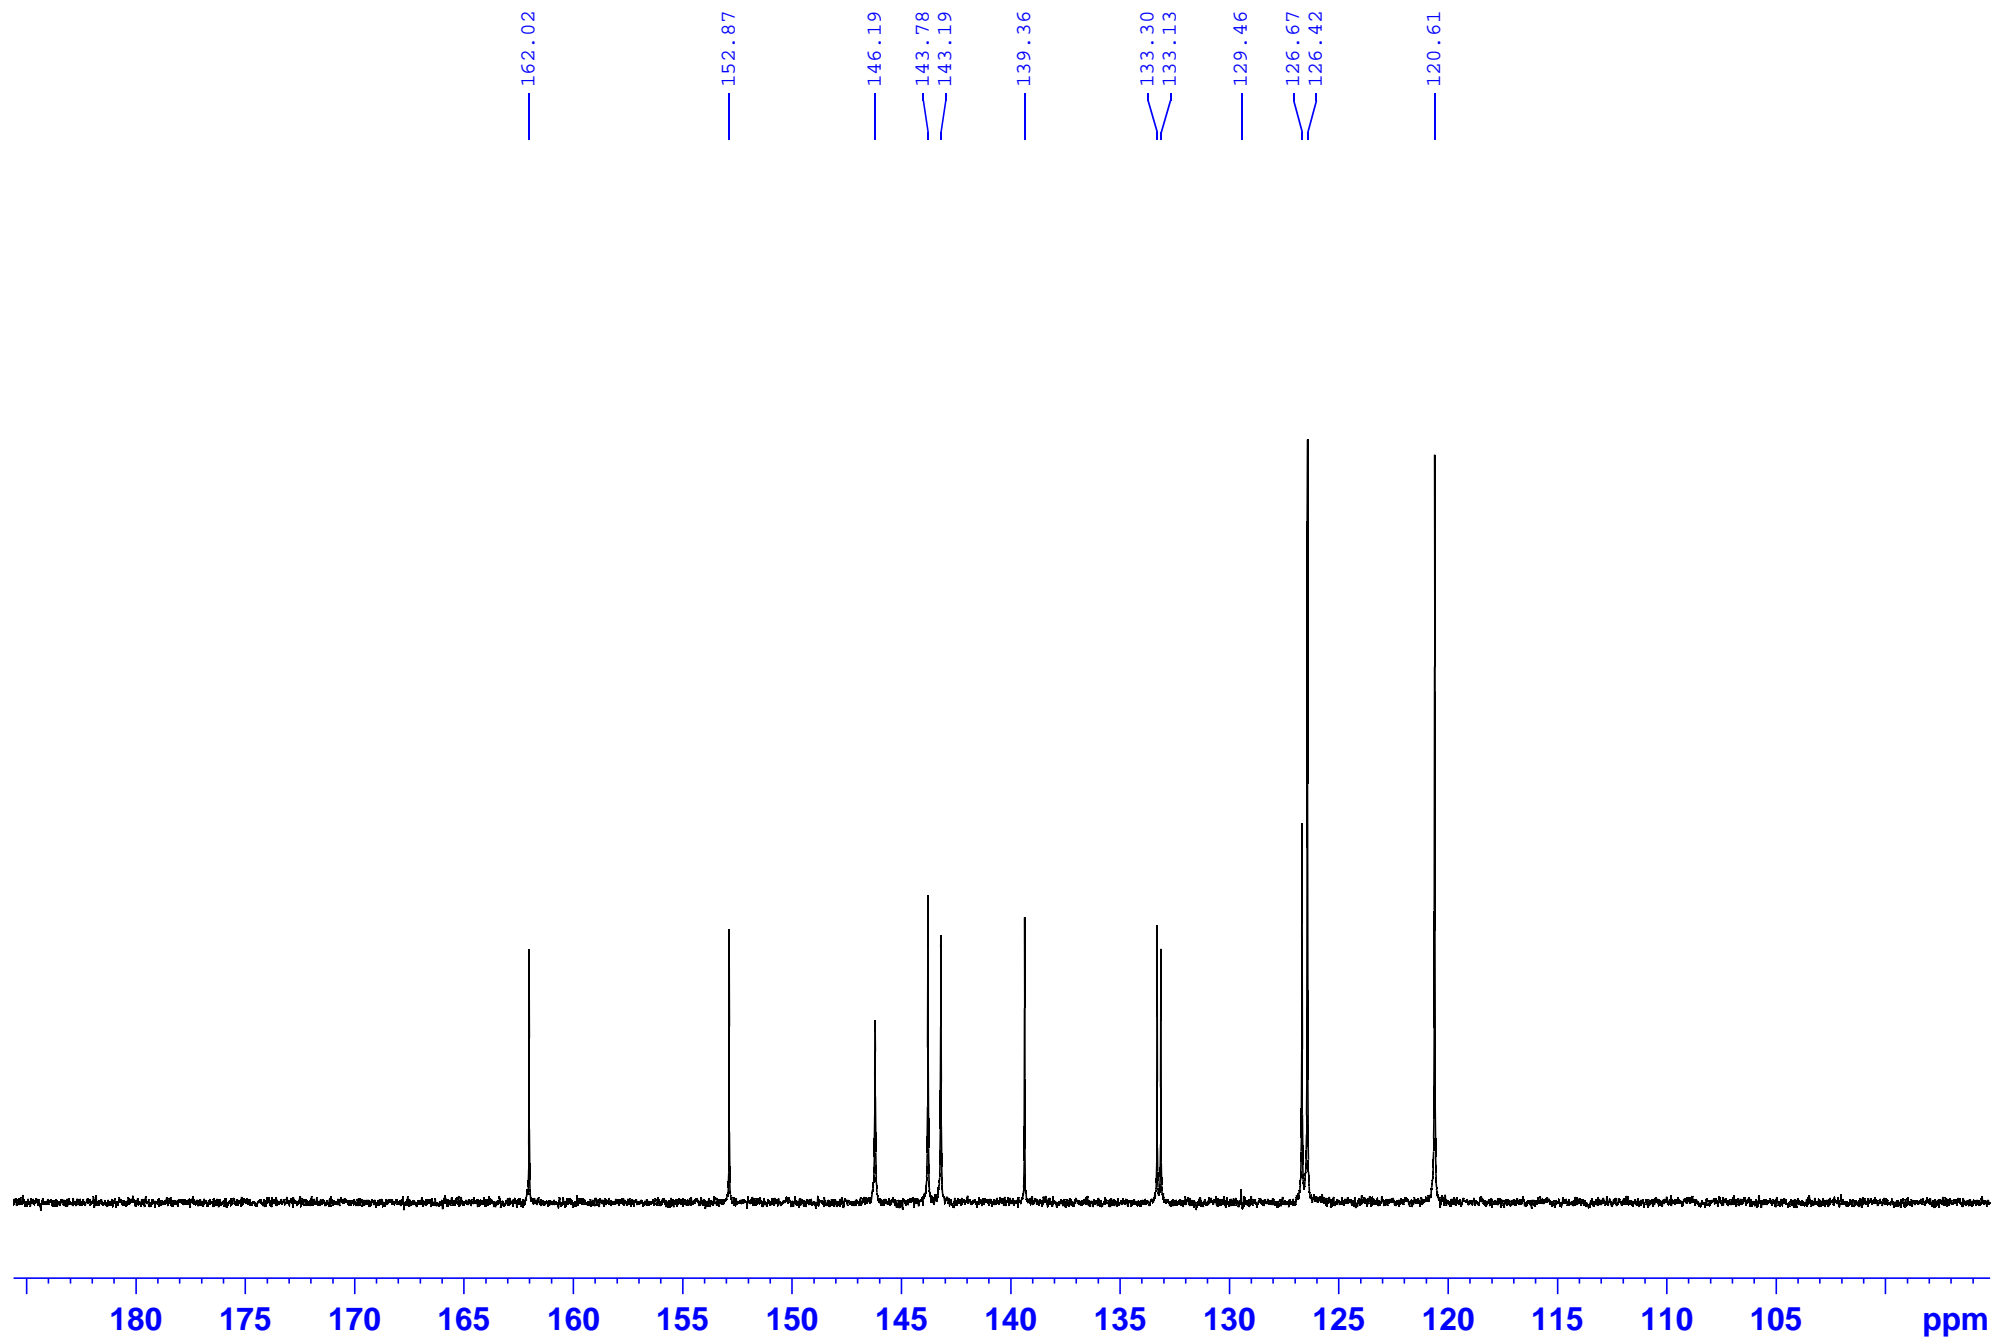

Wagdy El Dahna-RB 5-DMSO-Hnmr-A

11.201  
10.400  
9.477  
9.040  
9.027  
8.985  
8.964  
8.098  
8.084  
8.079  
8.065  
7.901  
7.879  
7.695  
7.673

2.515  
2.156

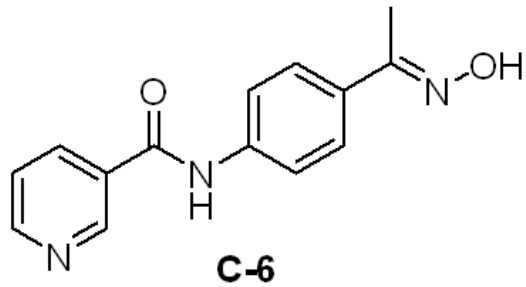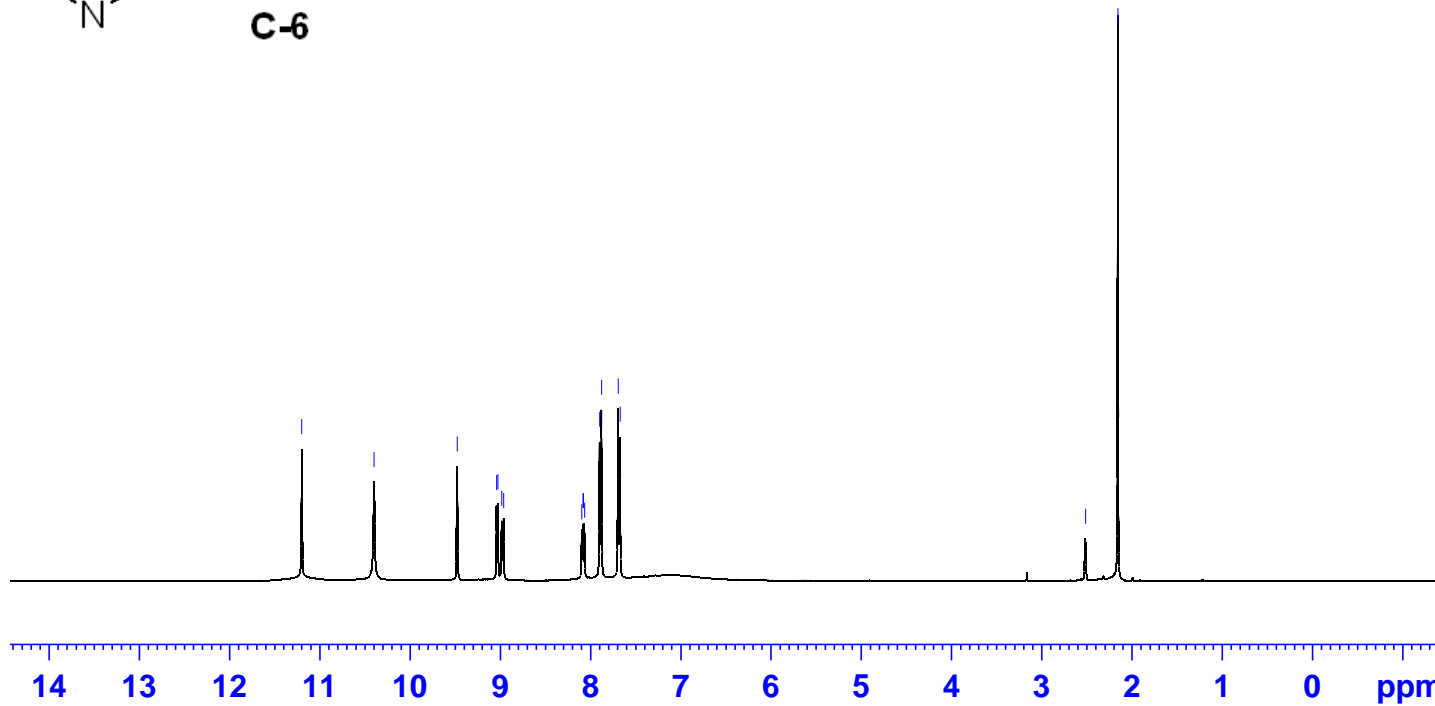

1.82  
1.86  
1.13  
2.04  
1.23  
2.16  
2.16

0.49  
3.00

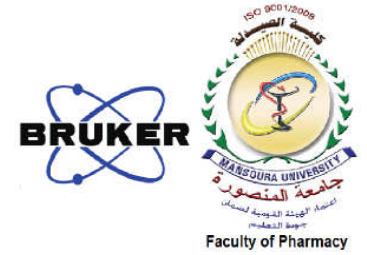

Current Data Parameters  
NAME Wagdy El Dahna-RB 5-DMSO-H  
EXPNO 10  
PROCNO 1

F2 - Acquisition Parameters  
Date\_ 20210610  
Time 11.43 h  
INSTRUM spect  
PROBHD Z108618\_0945 (  
PULPROG zg30  
TD 65536  
SOLVENT DMSO  
NS 16  
DS 2  
SWH 8012.820 Hz  
FIDRES 0.244532 Hz  
AQ 4.0894465 sec  
RG 99.3  
DW 62.400 usec  
DE 6.50 usec  
TE 294.3 K  
D1 1.00000000 sec  
TD0 1  
SFO1 400.2024712 MHz  
NUC1 1H  
P1 13.50 usec  
PLW1 13.00000000 W

F2 - Processing parameters  
SI 65536  
SF 400.2000000 MHz  
WDW EM  
SSB 0  
LB 0.30 Hz  
GB 0  
PC 1.00

Wagdy El Dahna-RB 5-DMSO-Hnmr-A

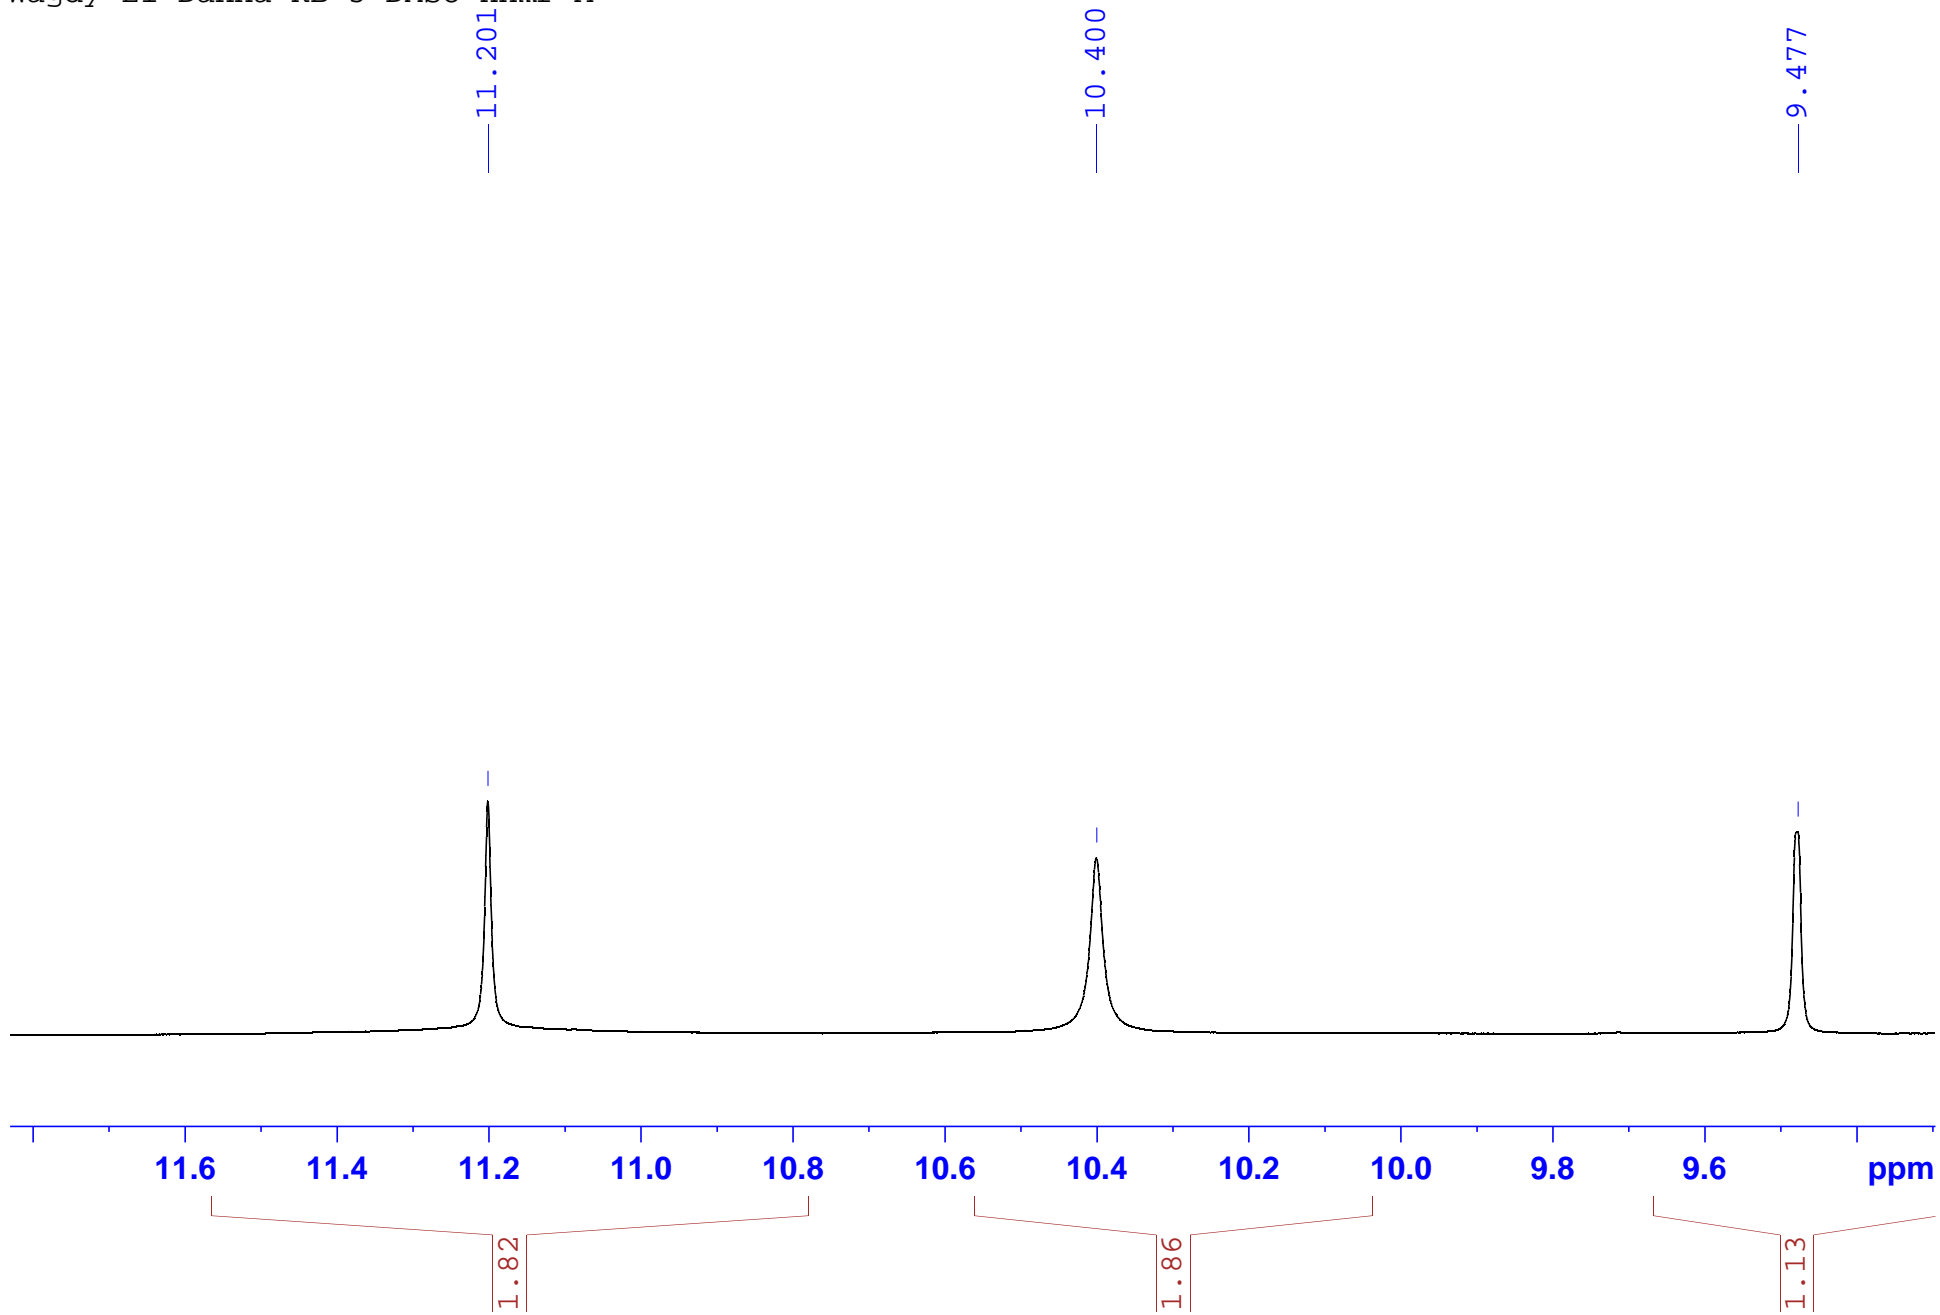

Wagdy El Dahna-RB 5-DMSO-Hnmr-A

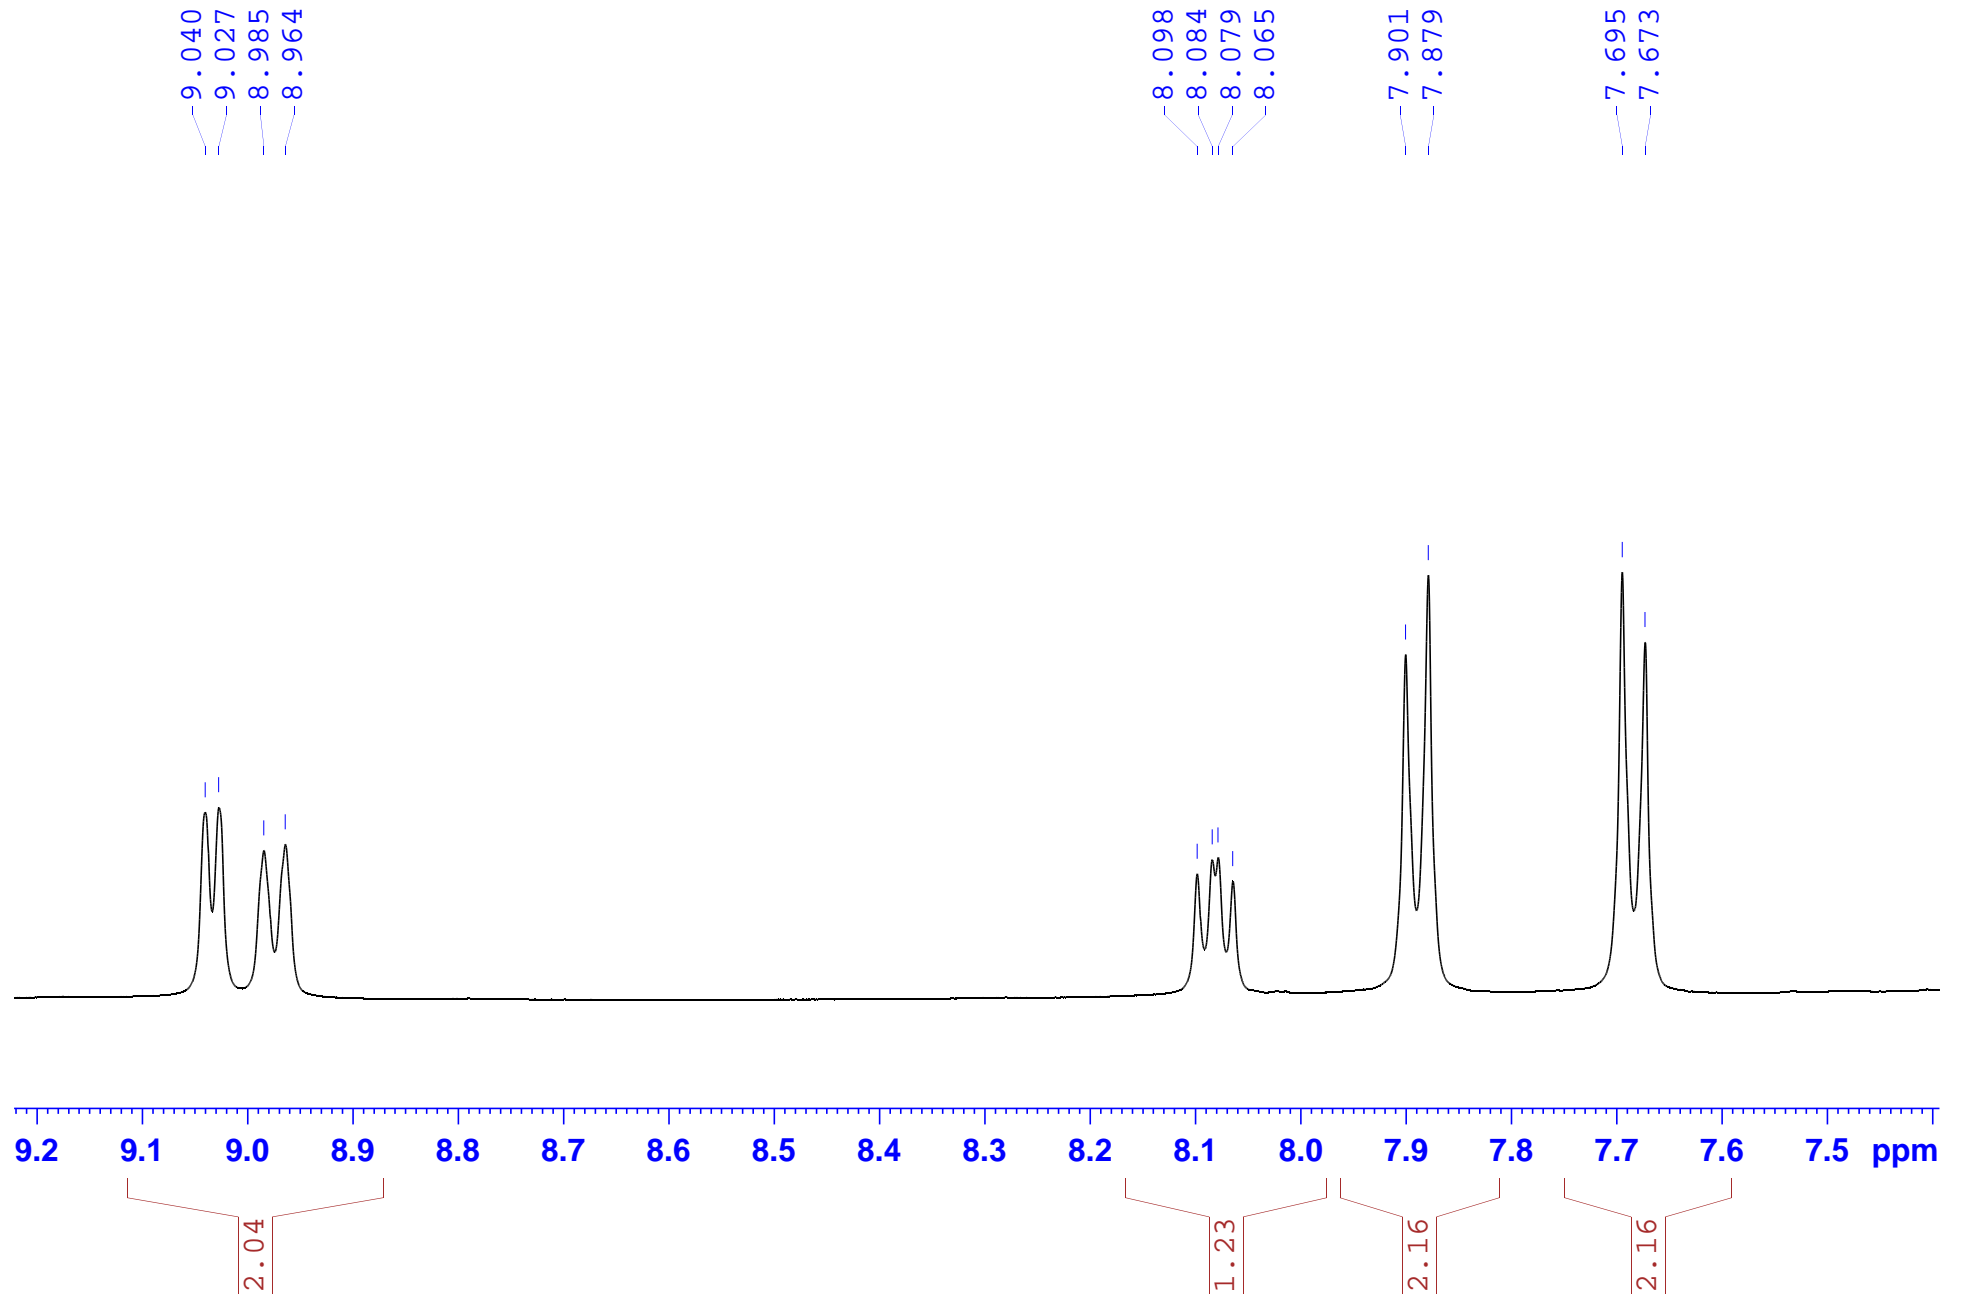

Wagdy El Dahna-RB 5-DMSO-Hmr-A

9.027  
8.985  
8.964  
8.098  
8.084  
8.079  
8.065  
7.901  
7.879  
7.695  
7.673

2.515  
2.156

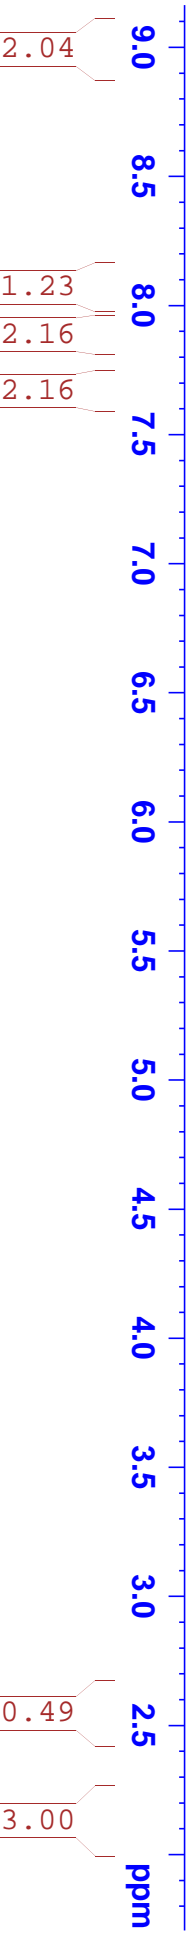



Wagdy eldehna -RB8-carbon-Es

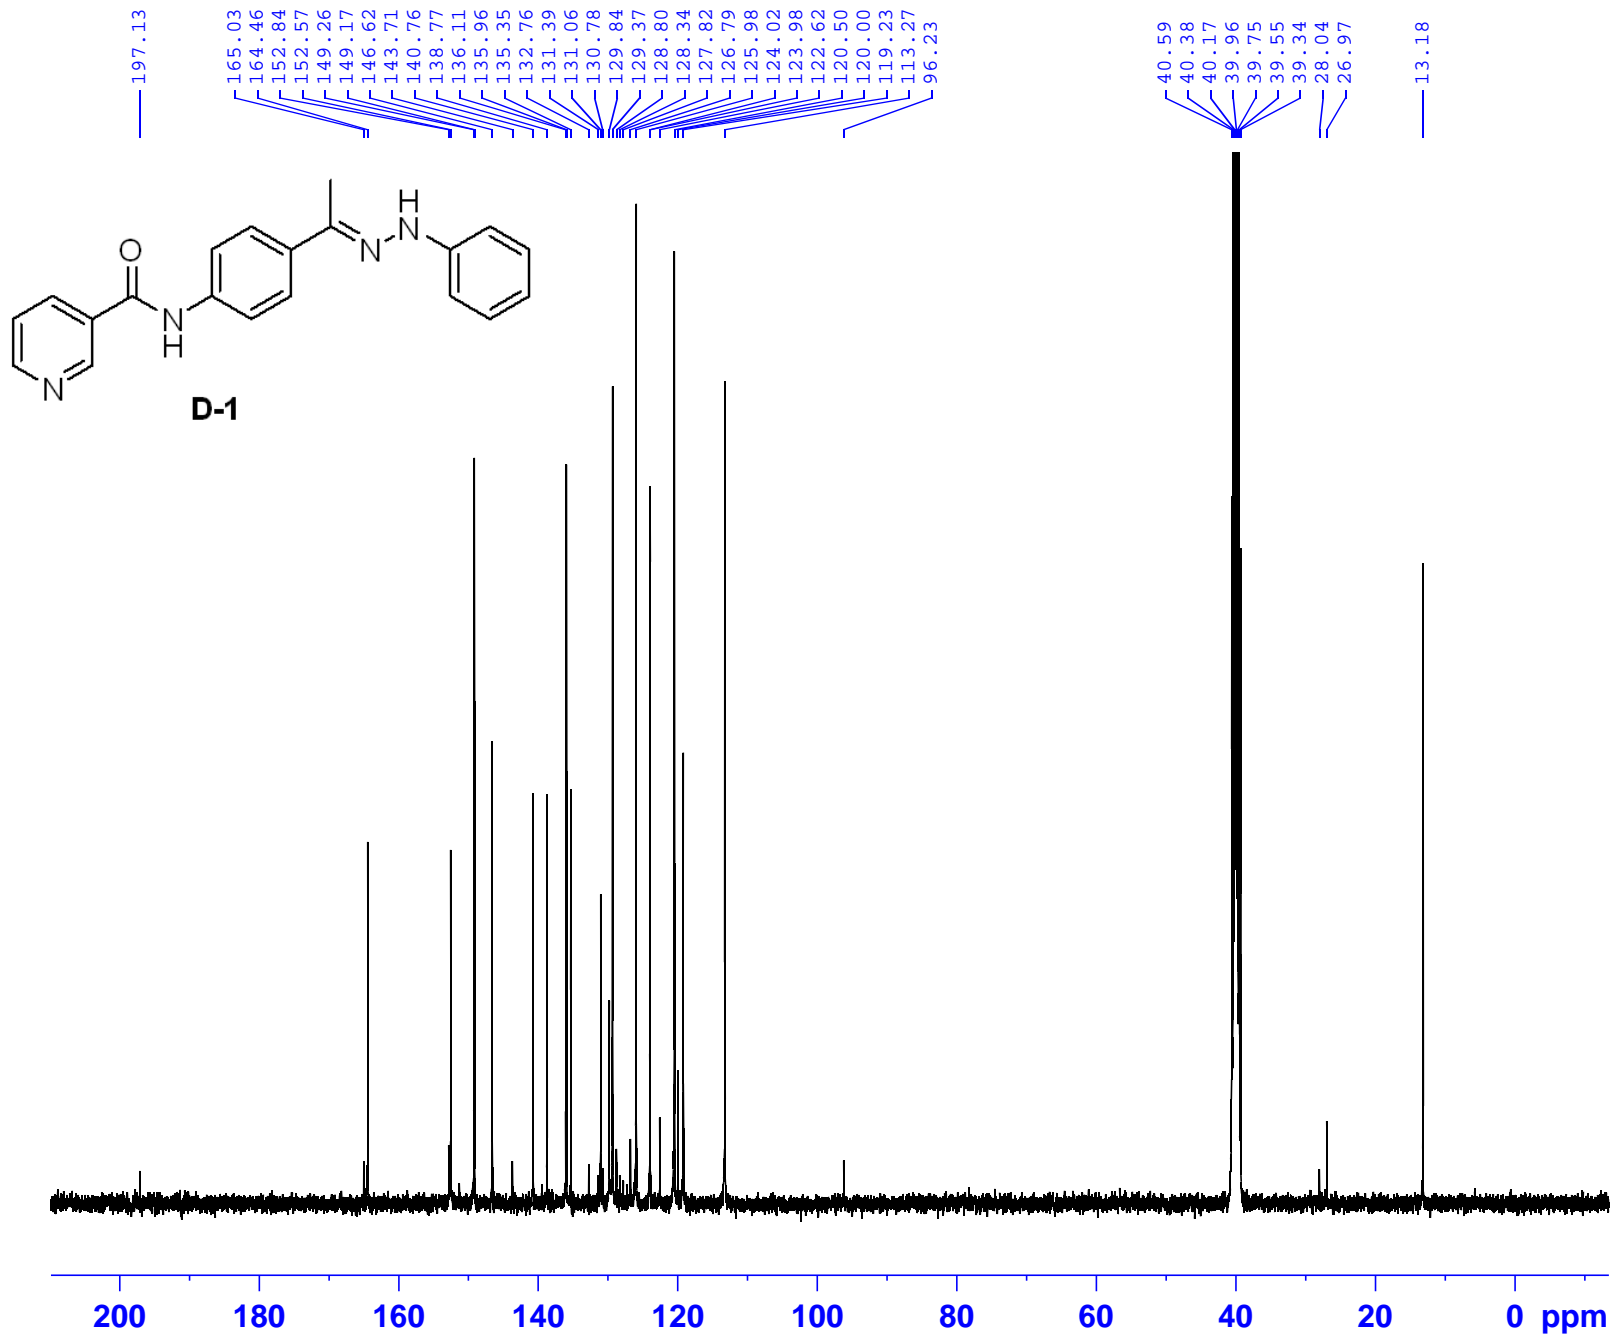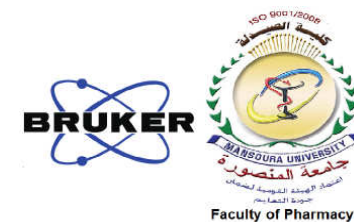

Current Data Parameters  
 NAME Wagdy eldehna -RB8-carbon-Es  
 EXPNO 10  
 PROCNO 1

F2 - Acquisition Parameters  
 Date\_ 20210627  
 Time 22.07 h  
 INSTRUM spect  
 PROBHD Z108618\_0945 (  
 PULPROG zgpg30  
 TD 65536  
 SOLVENT DMSO  
 NS 2200  
 DS 4  
 SWH 24038.461 Hz  
 FIDRES 0.733596 Hz  
 AQ 1.3631488 sec  
 RG 197.77  
 DW 20.800 usec  
 DE 6.50 usec  
 TE 297.3 K  
 D1 2.00000000 sec  
 D11 0.03000000 sec  
 TD0 1  
 SFO1 100.6404331 MHz  
 NUC1 13C  
 P1 10.00 usec  
 PLW1 47.00000000 W  
 SFO2 400.2016008 MHz  
 NUC2 1H  
 CPDPRG[2] waltz16  
 PCPD2 90.00 usec  
 PLW2 13.00000000 W  
 PLW12 0.29249999 W  
 PLW13 0.14713000 W

F2 - Processing parameters  
 SI 32768  
 SF 100.6303700 MHz  
 WDW EM  
 SSB 0  
 LB 1.00 Hz  
 GB 0  
 PC 1.40

Wagdy eldehna -RB8-carbon-Es

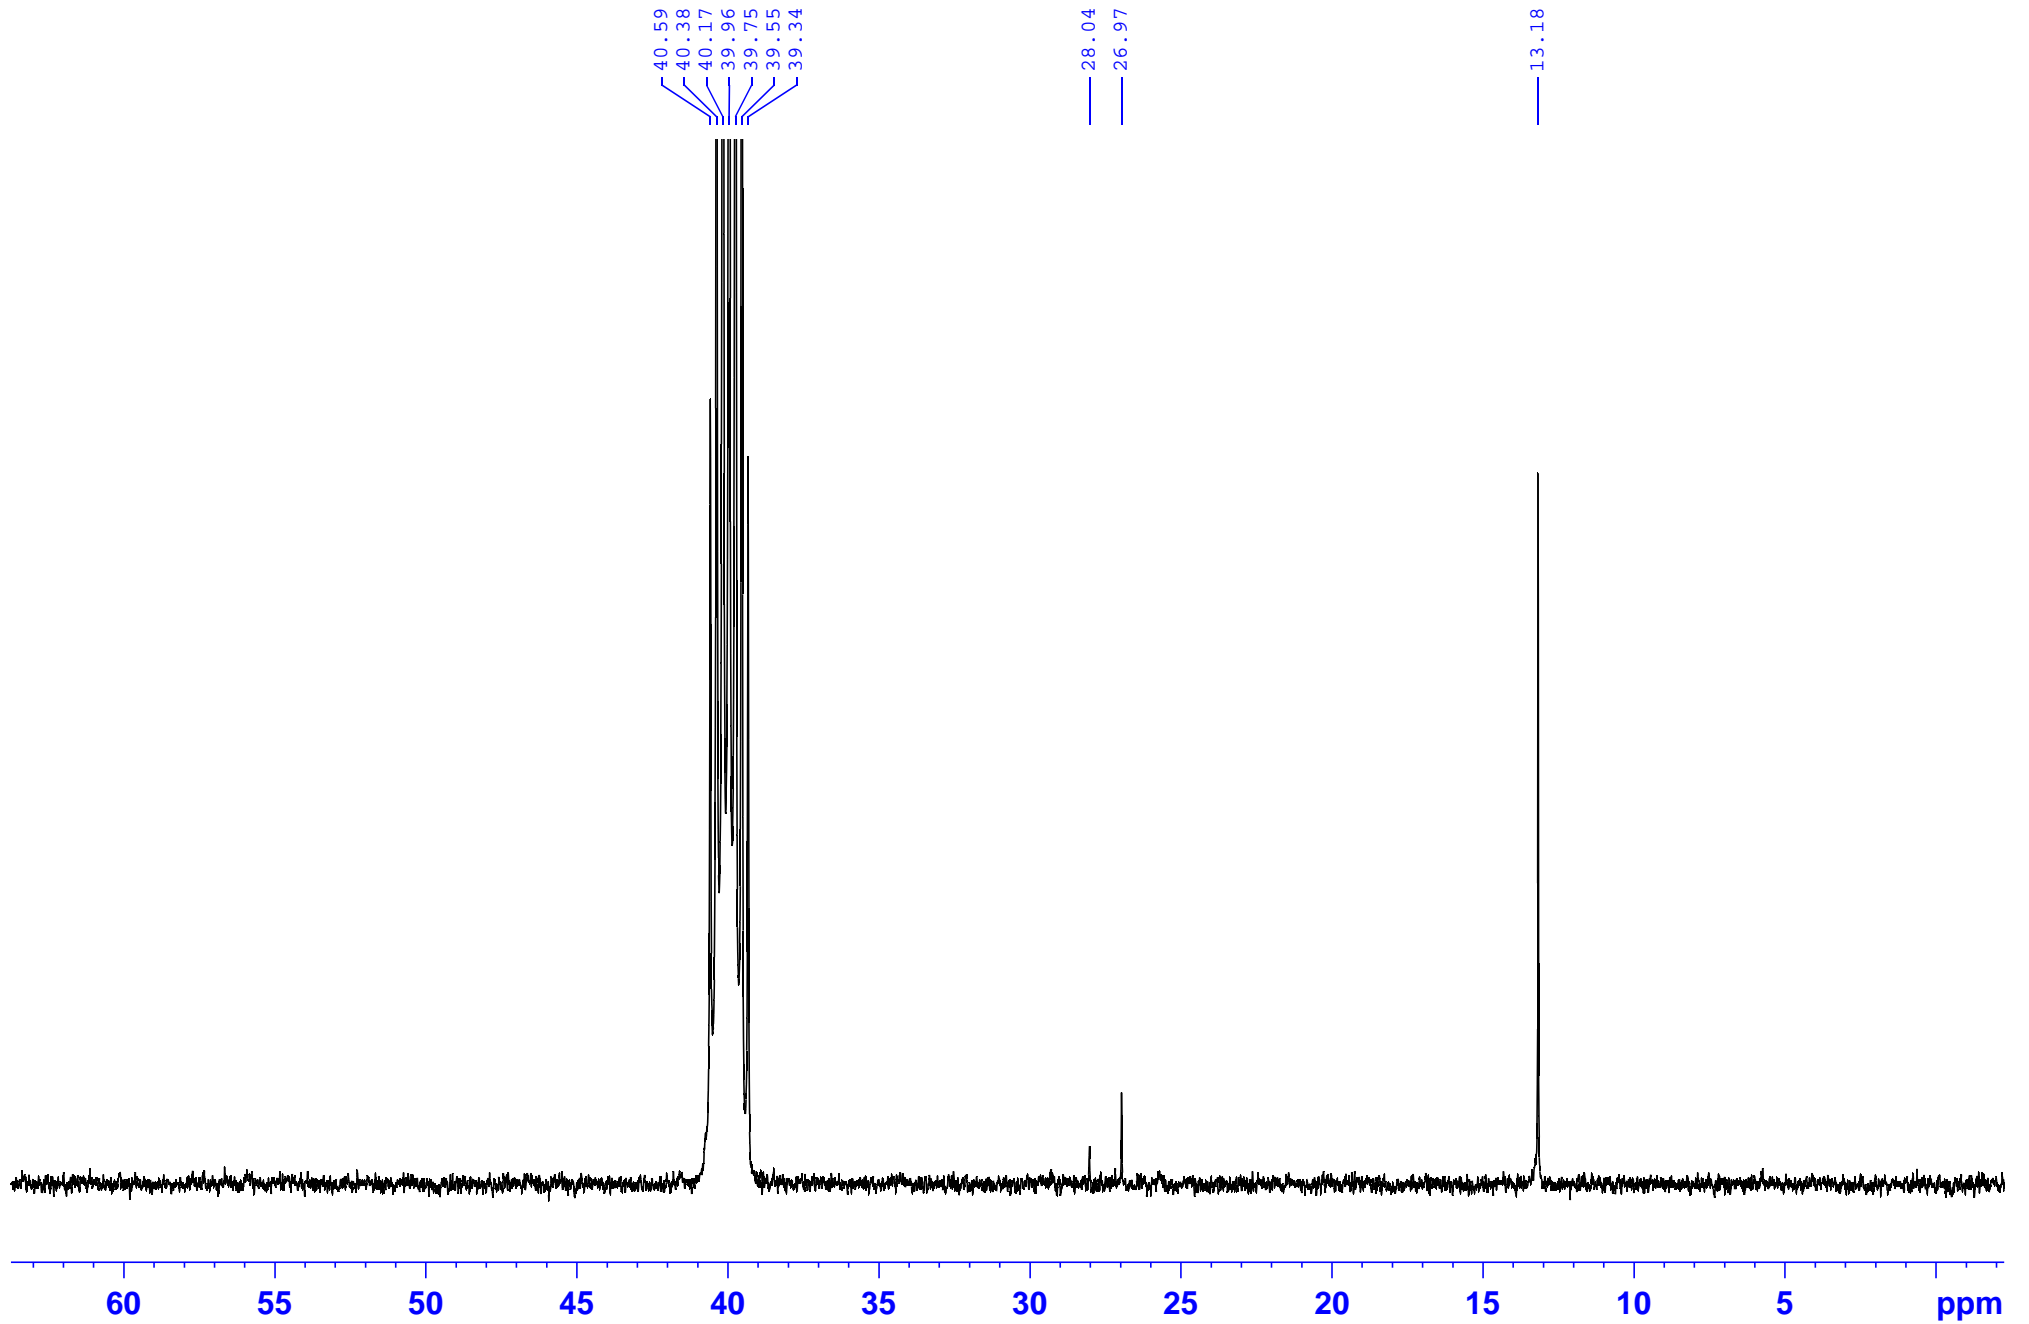

Wagdy eldehna -RB8-carbon-Es

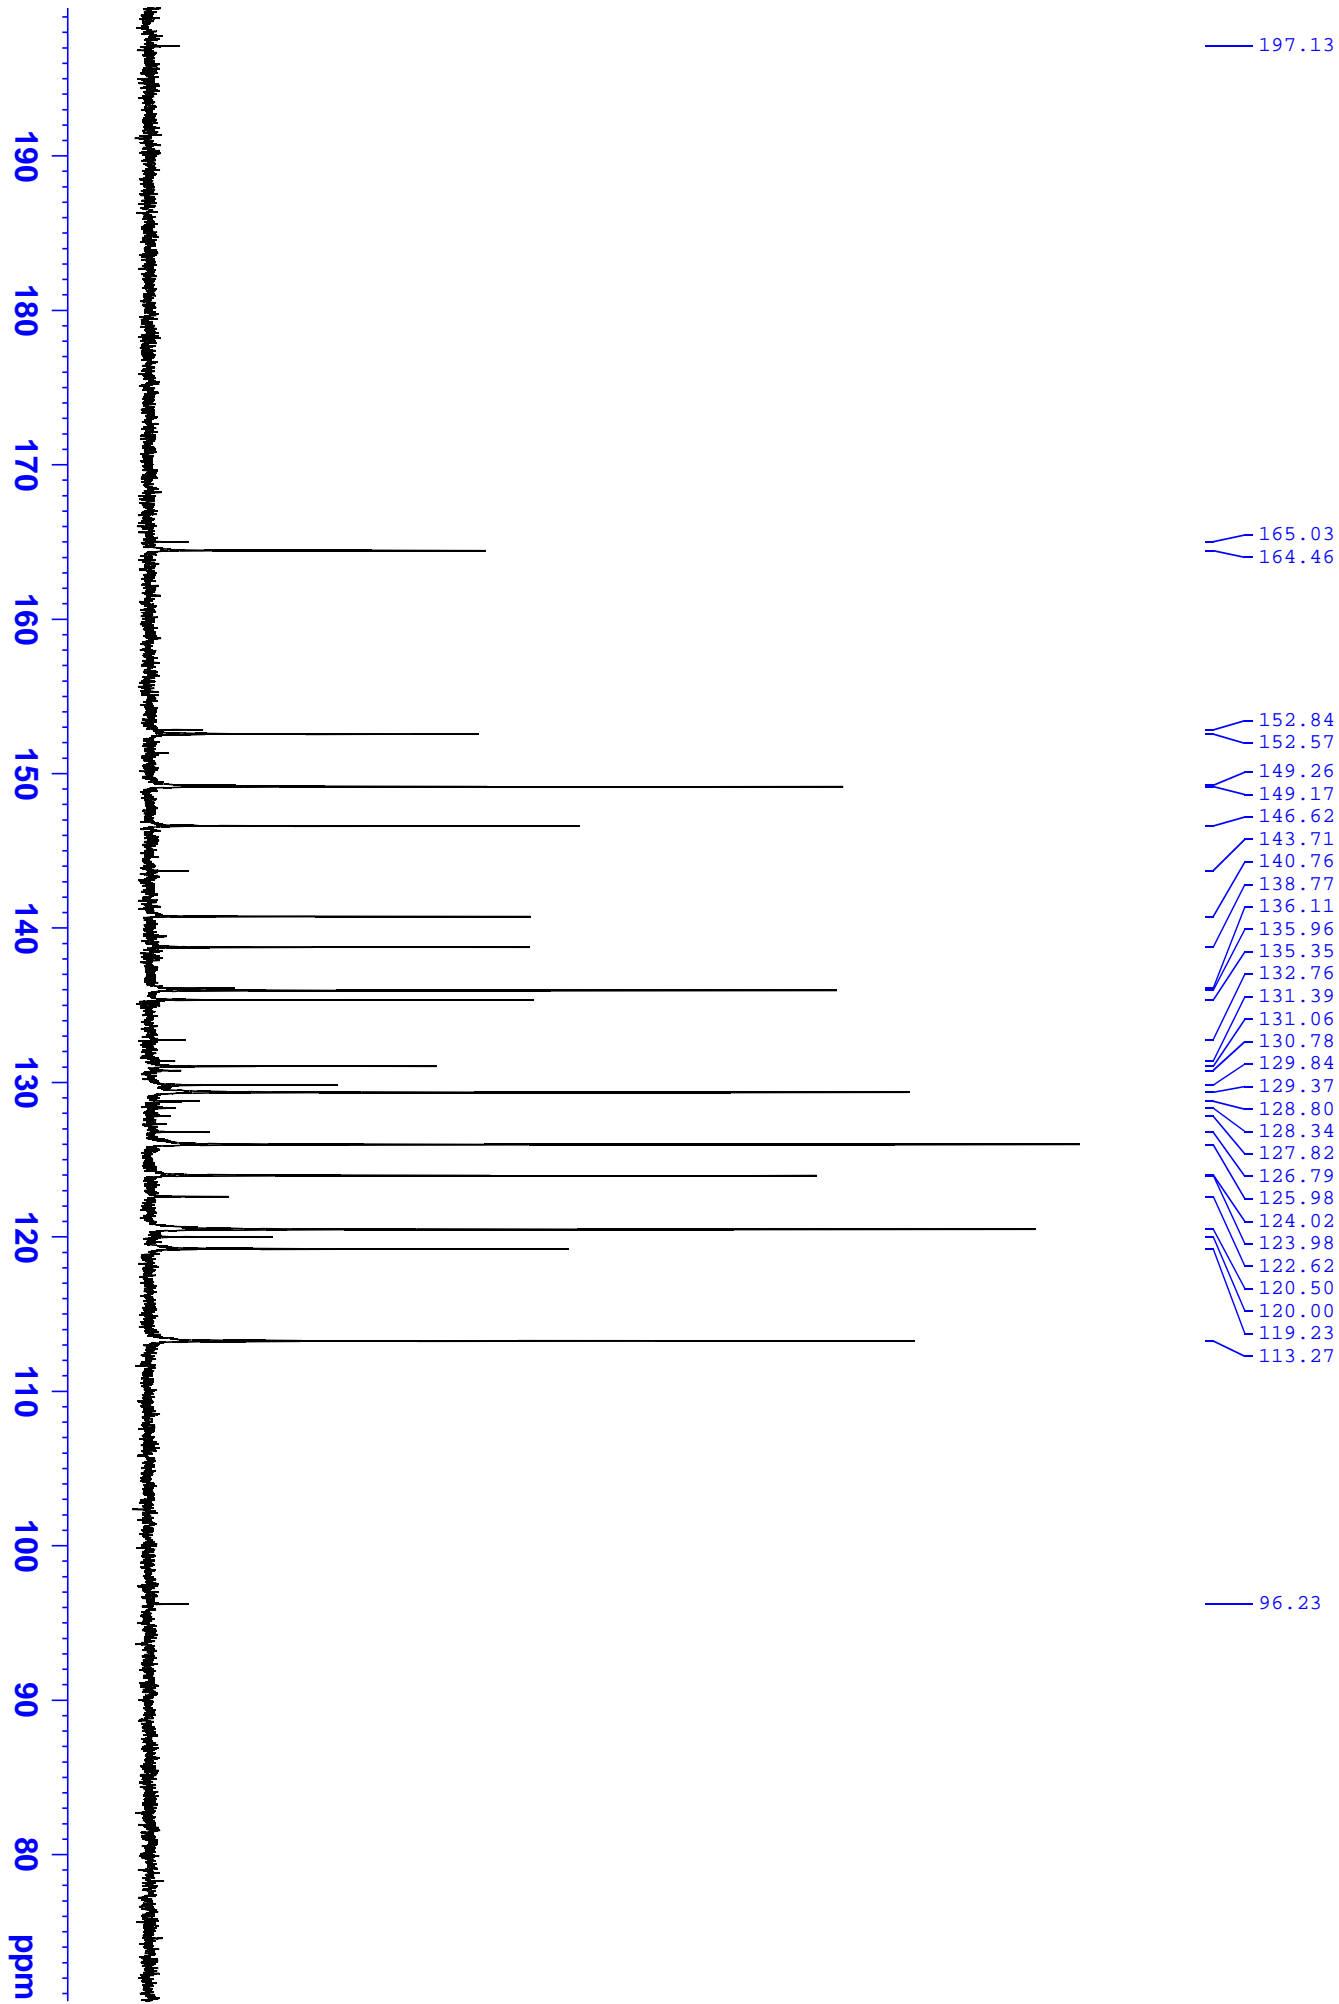

Wagdy El Dahna-RB 8-DMSO-Hnmr-A

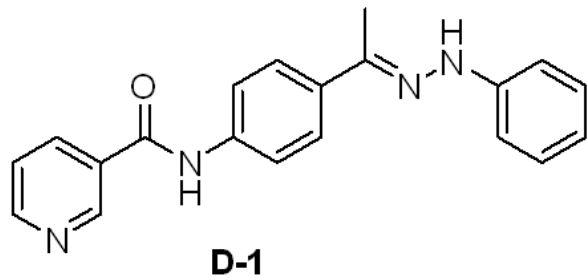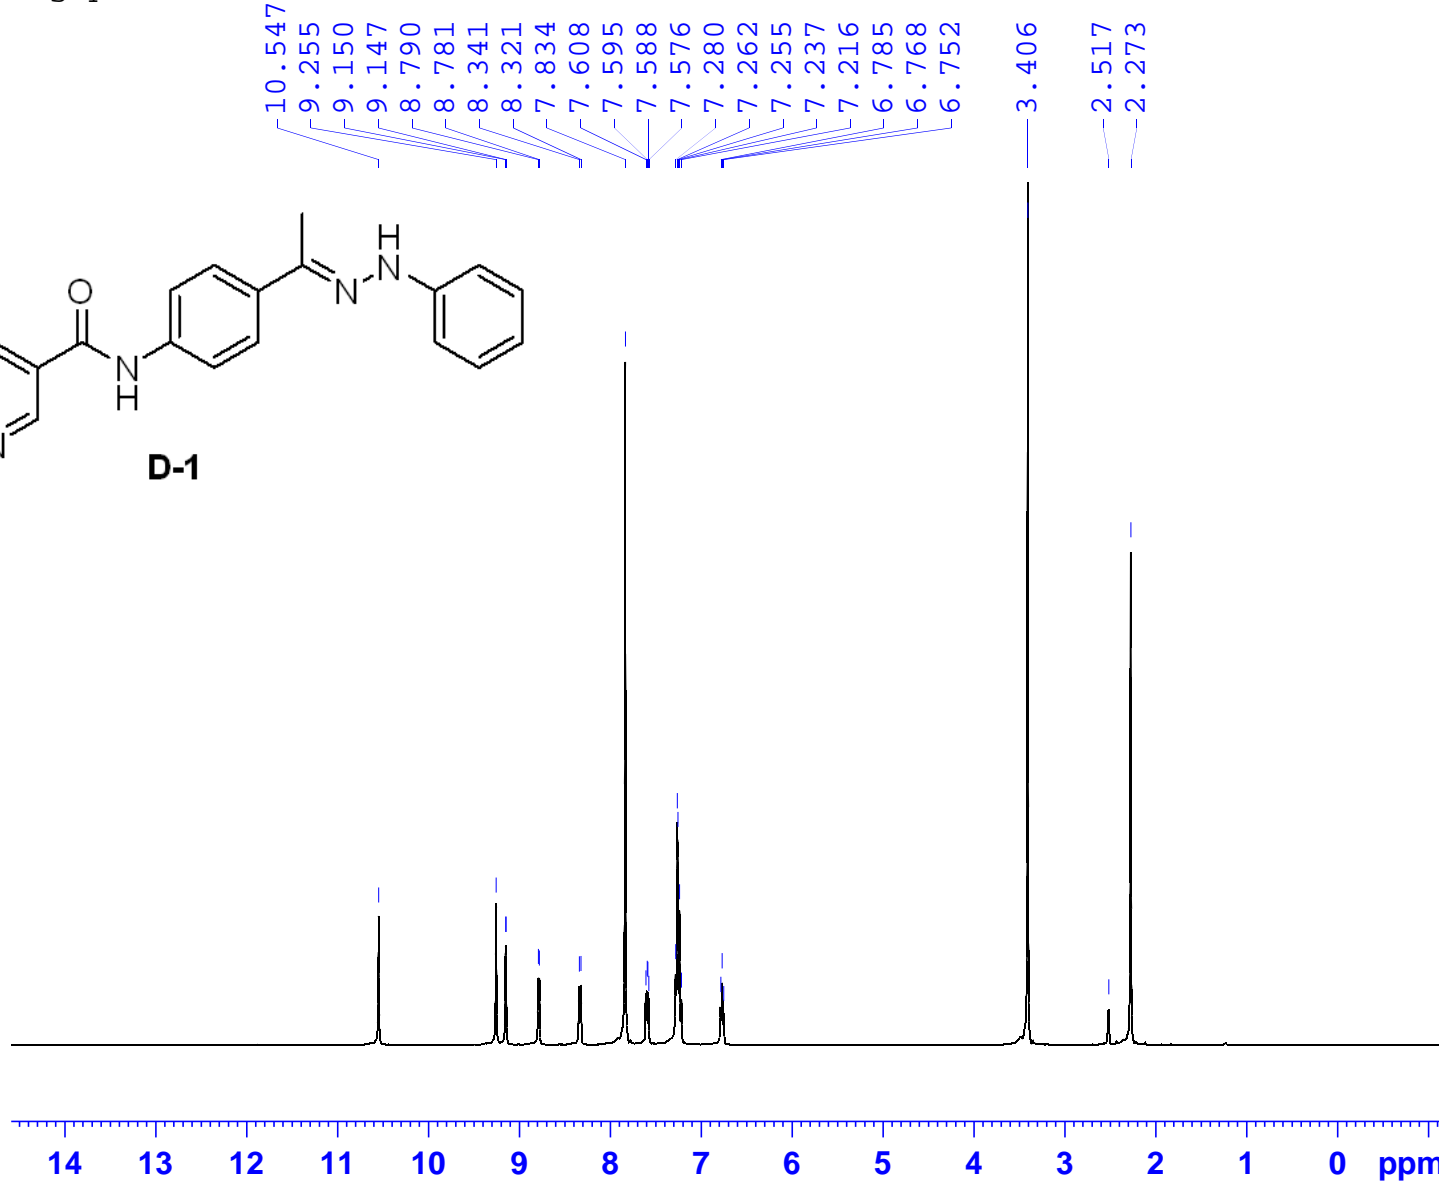

Current Data Parameters  
NAME Wagdy El Dahna-RB 8-DMSO-H  
EXPNO 10  
PROCNO 1

F2 - Acquisition Parameters  
Date\_ 20210610  
Time 11.24 h  
INSTRUM spect  
PROBHD Z108618\_0945 (  
PULPROG zg30  
TD 65536  
SOLVENT DMSO  
NS 16  
DS 2  
SWH 8012.820 Hz  
FIDRES 0.244532 Hz  
AQ 4.0894465 sec  
RG 99.3  
DW 62.400 usec  
DE 6.50 usec  
TE 294.4 K  
D1 1.00000000 sec  
TD0 1  
SFO1 400.2024712 MHz  
NUC1 1H  
P1 13.50 usec  
PLW1 13.00000000 W

F2 - Processing parameters  
SI 65536  
SF 400.2000000 MHz  
WDW EM  
SSB 0  
LB 0.30 Hz  
GB 0  
PC 1.00

Wagdy El Dahna-RB 8-DMSO-Hnmr-A

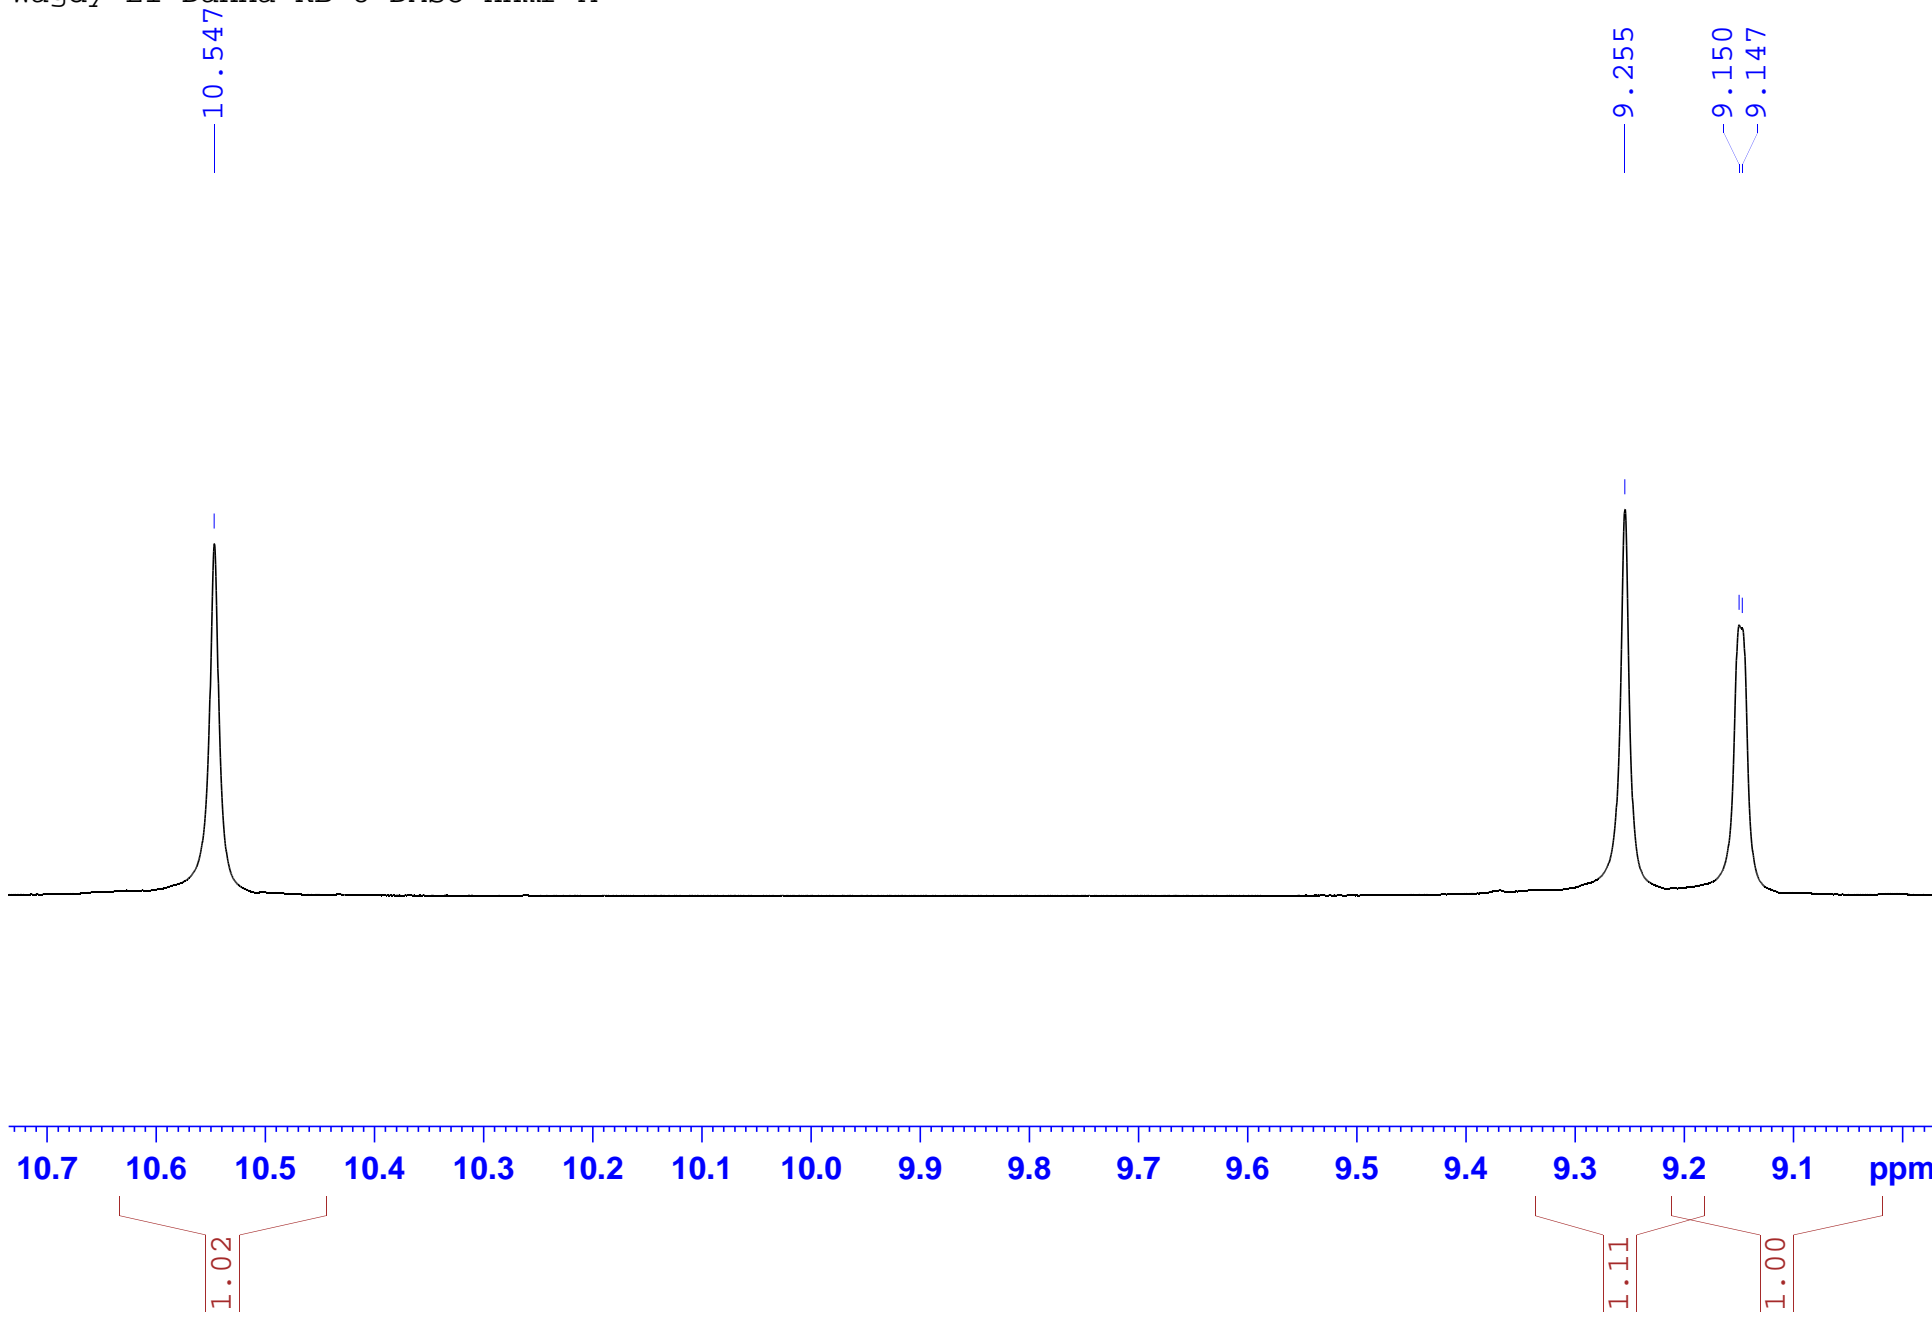

Wagdy El Dahna-RB 8-DMSO-Hnmr-A

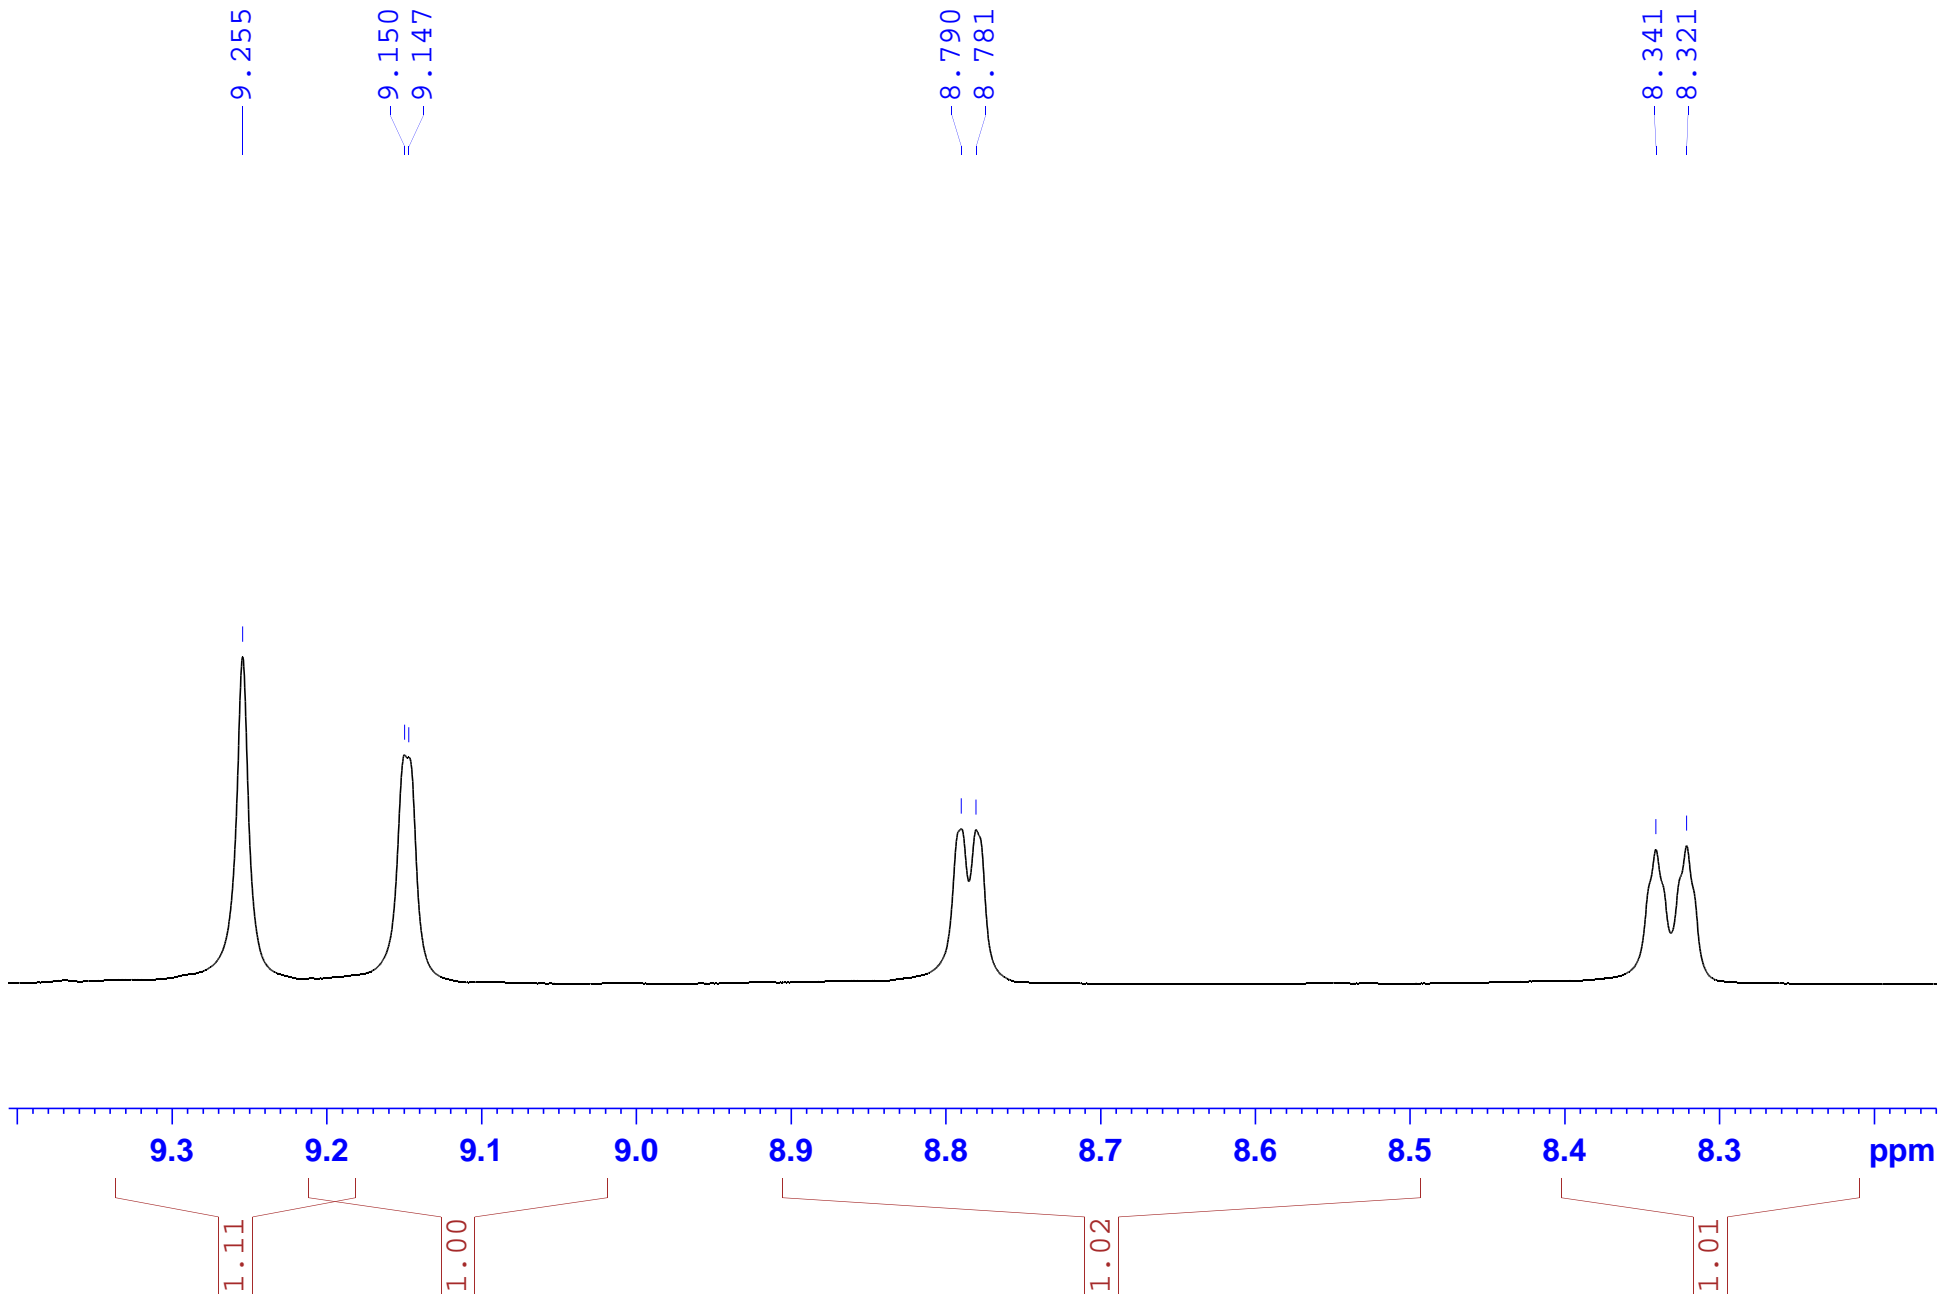

Wagdy El Dahna-RB 8-DMSO-Hnmr-A

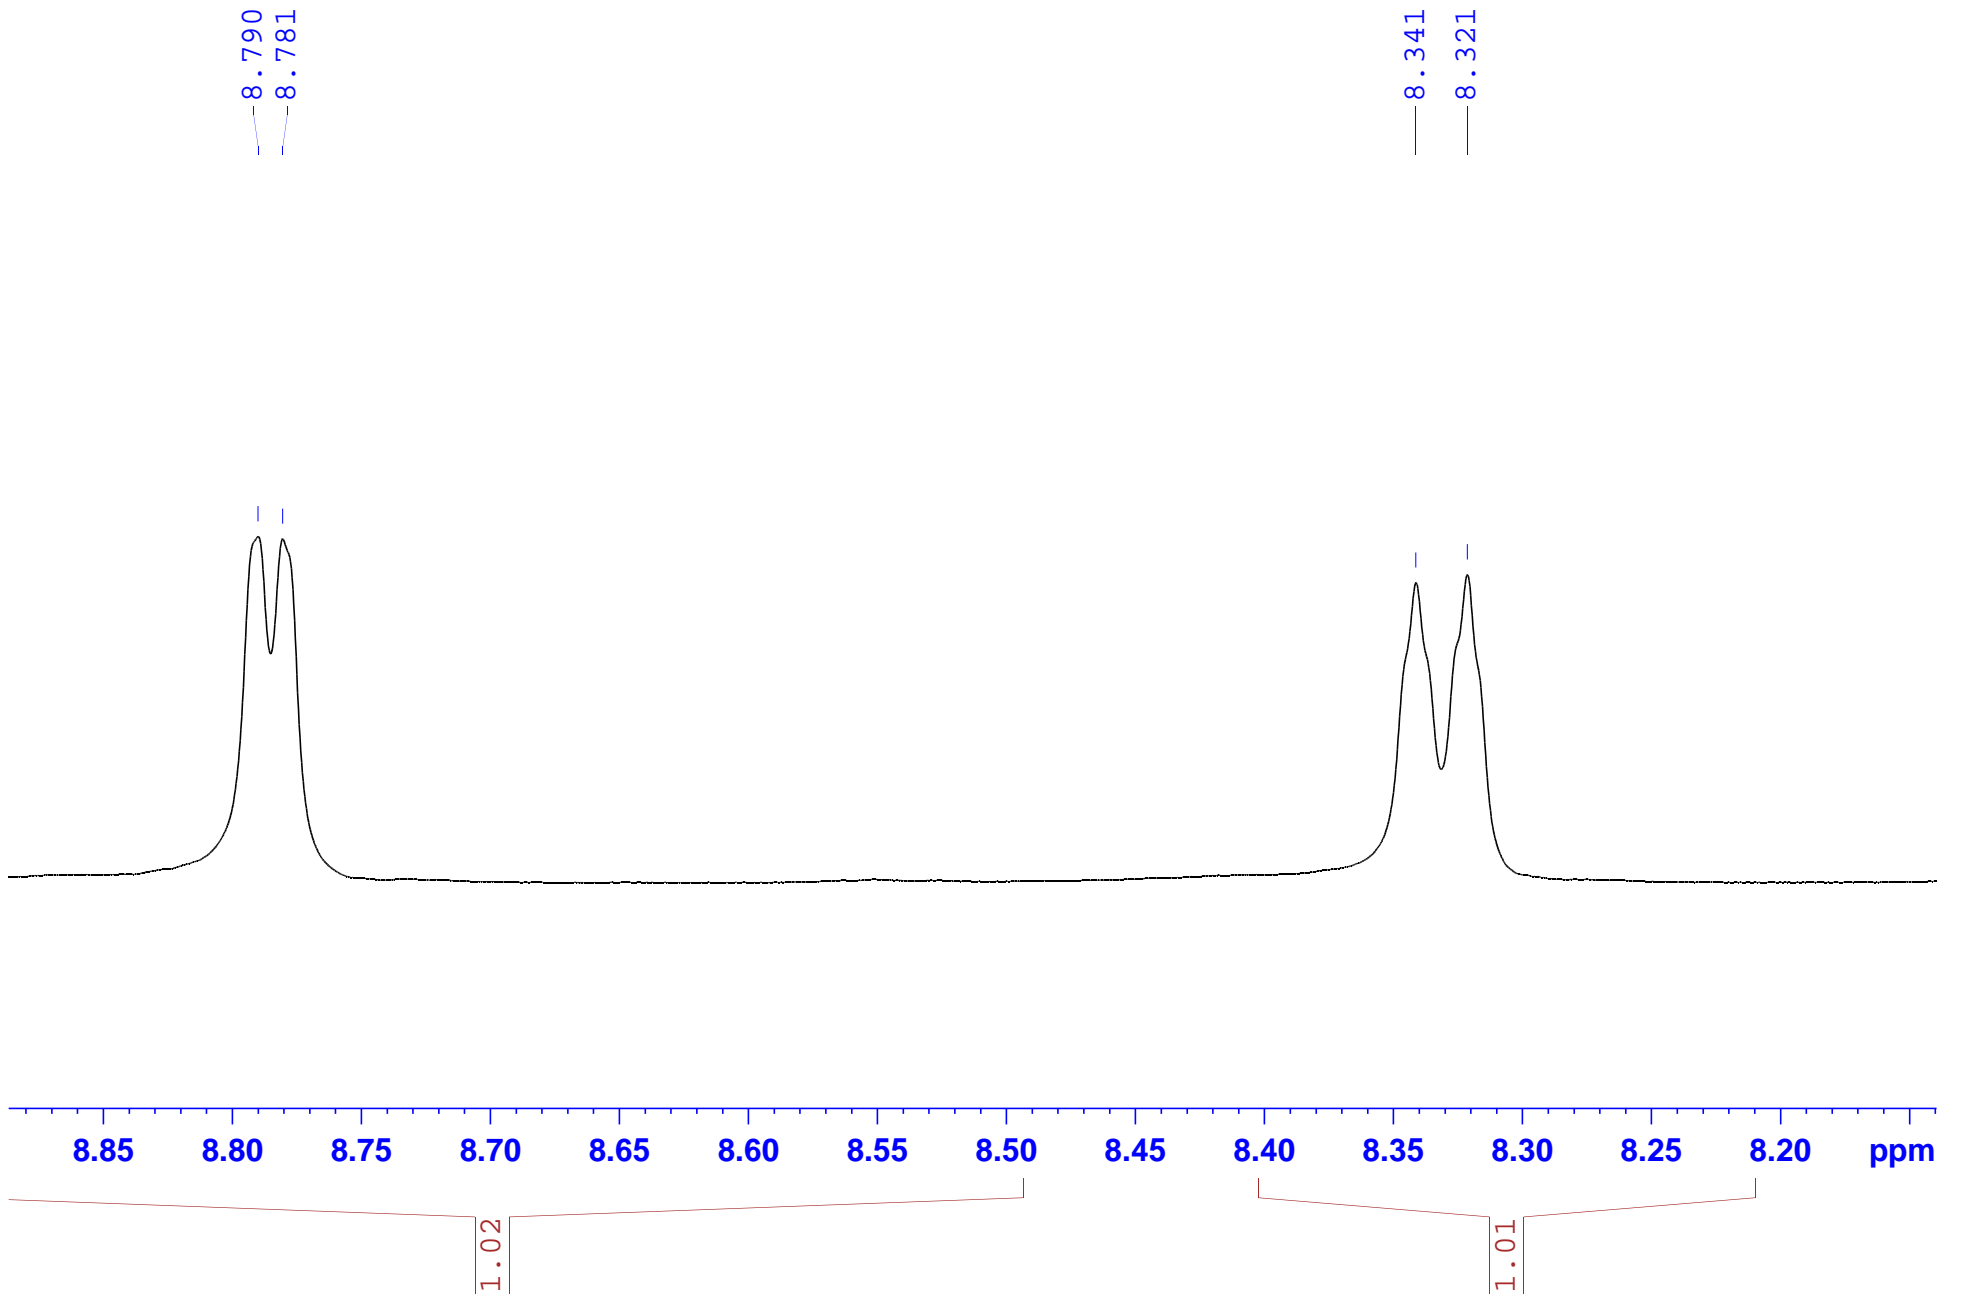

Wagdy El Dahna-RB 8-DMSO-Hmr-A

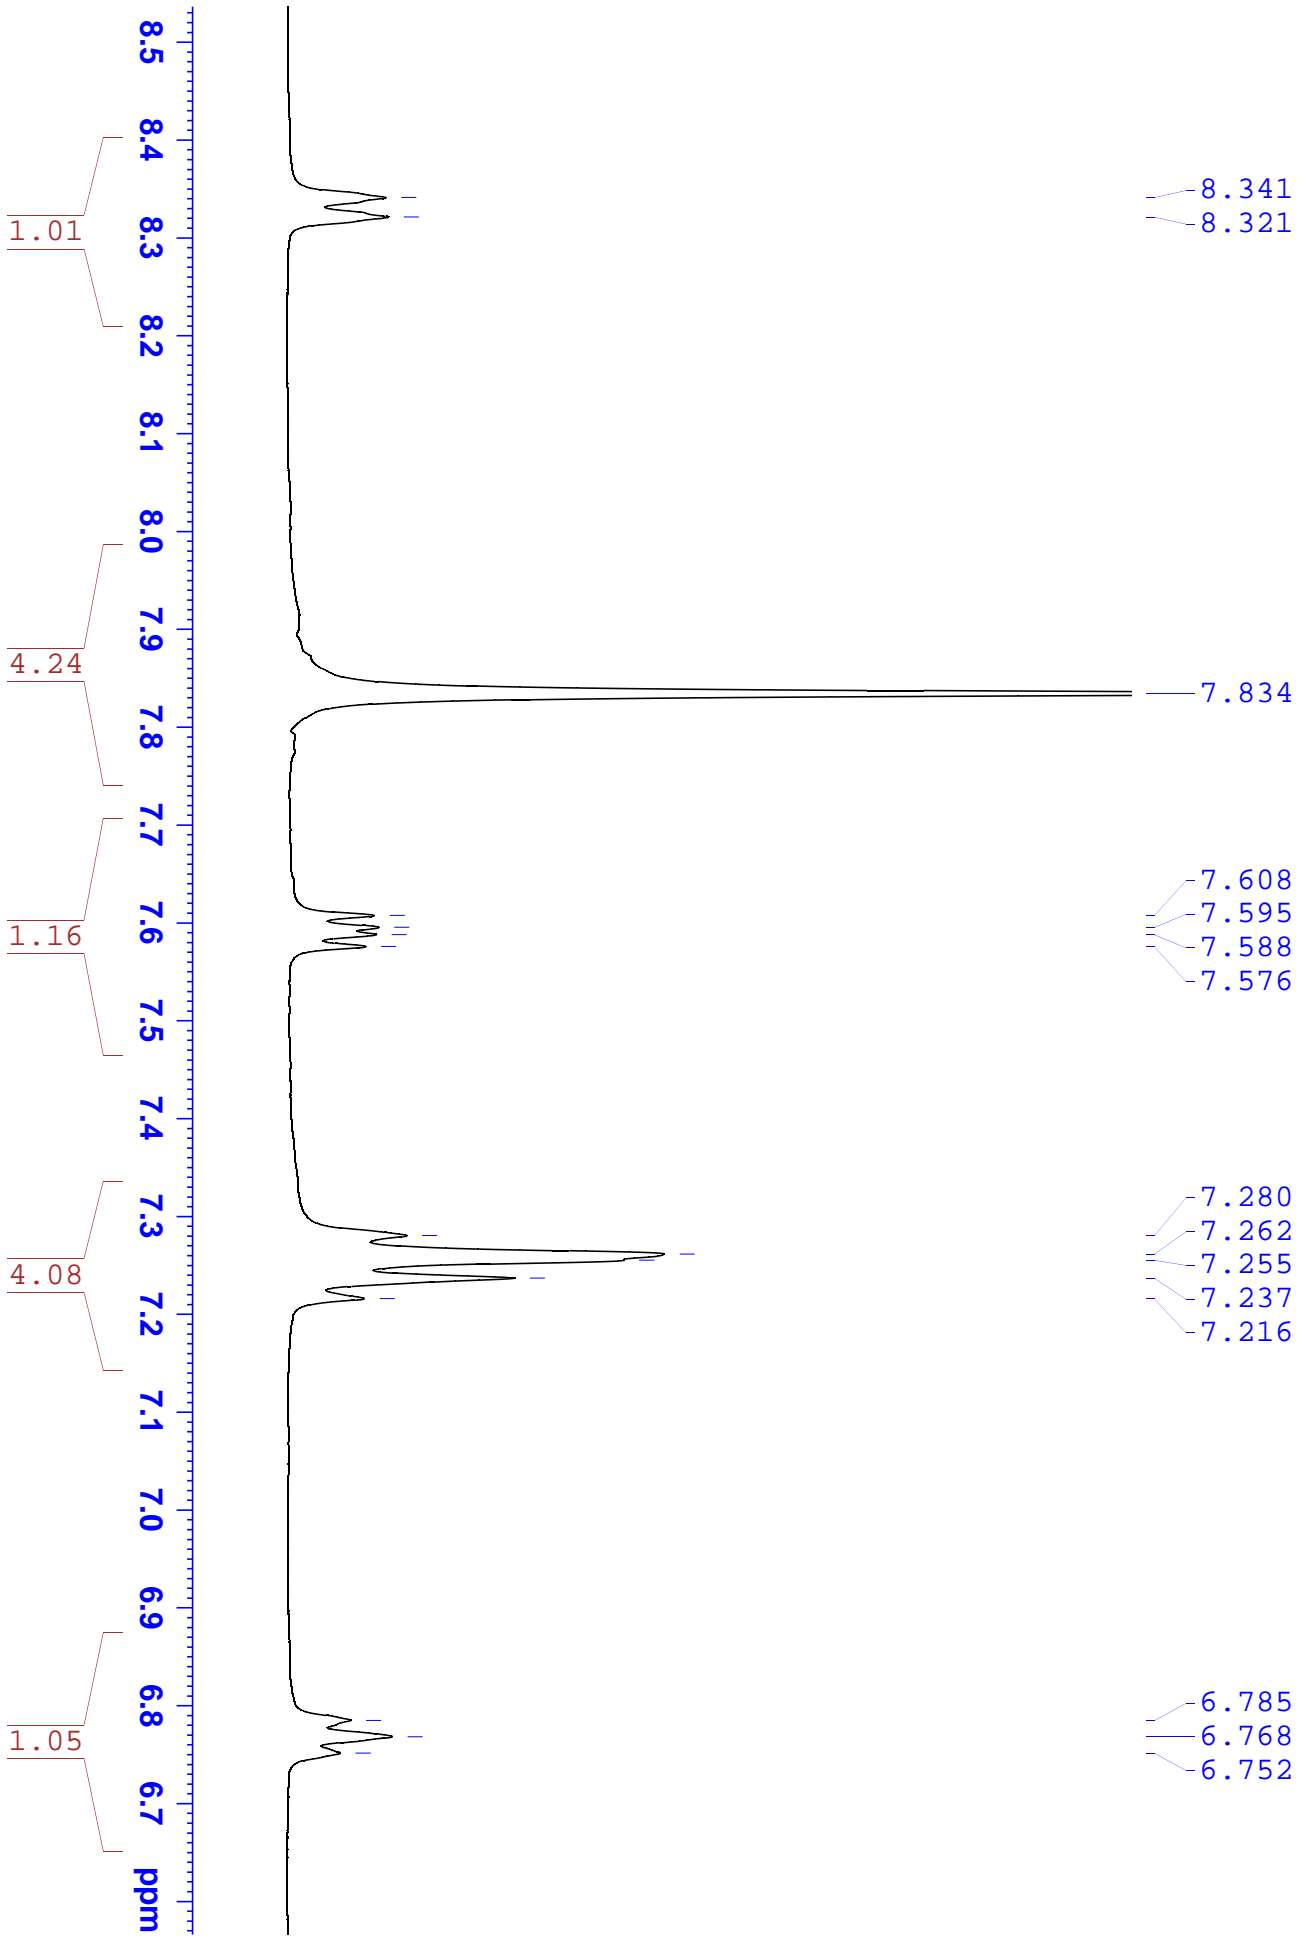



Wagdy El Dahna-RB 8-DMSO-Hnmr-A

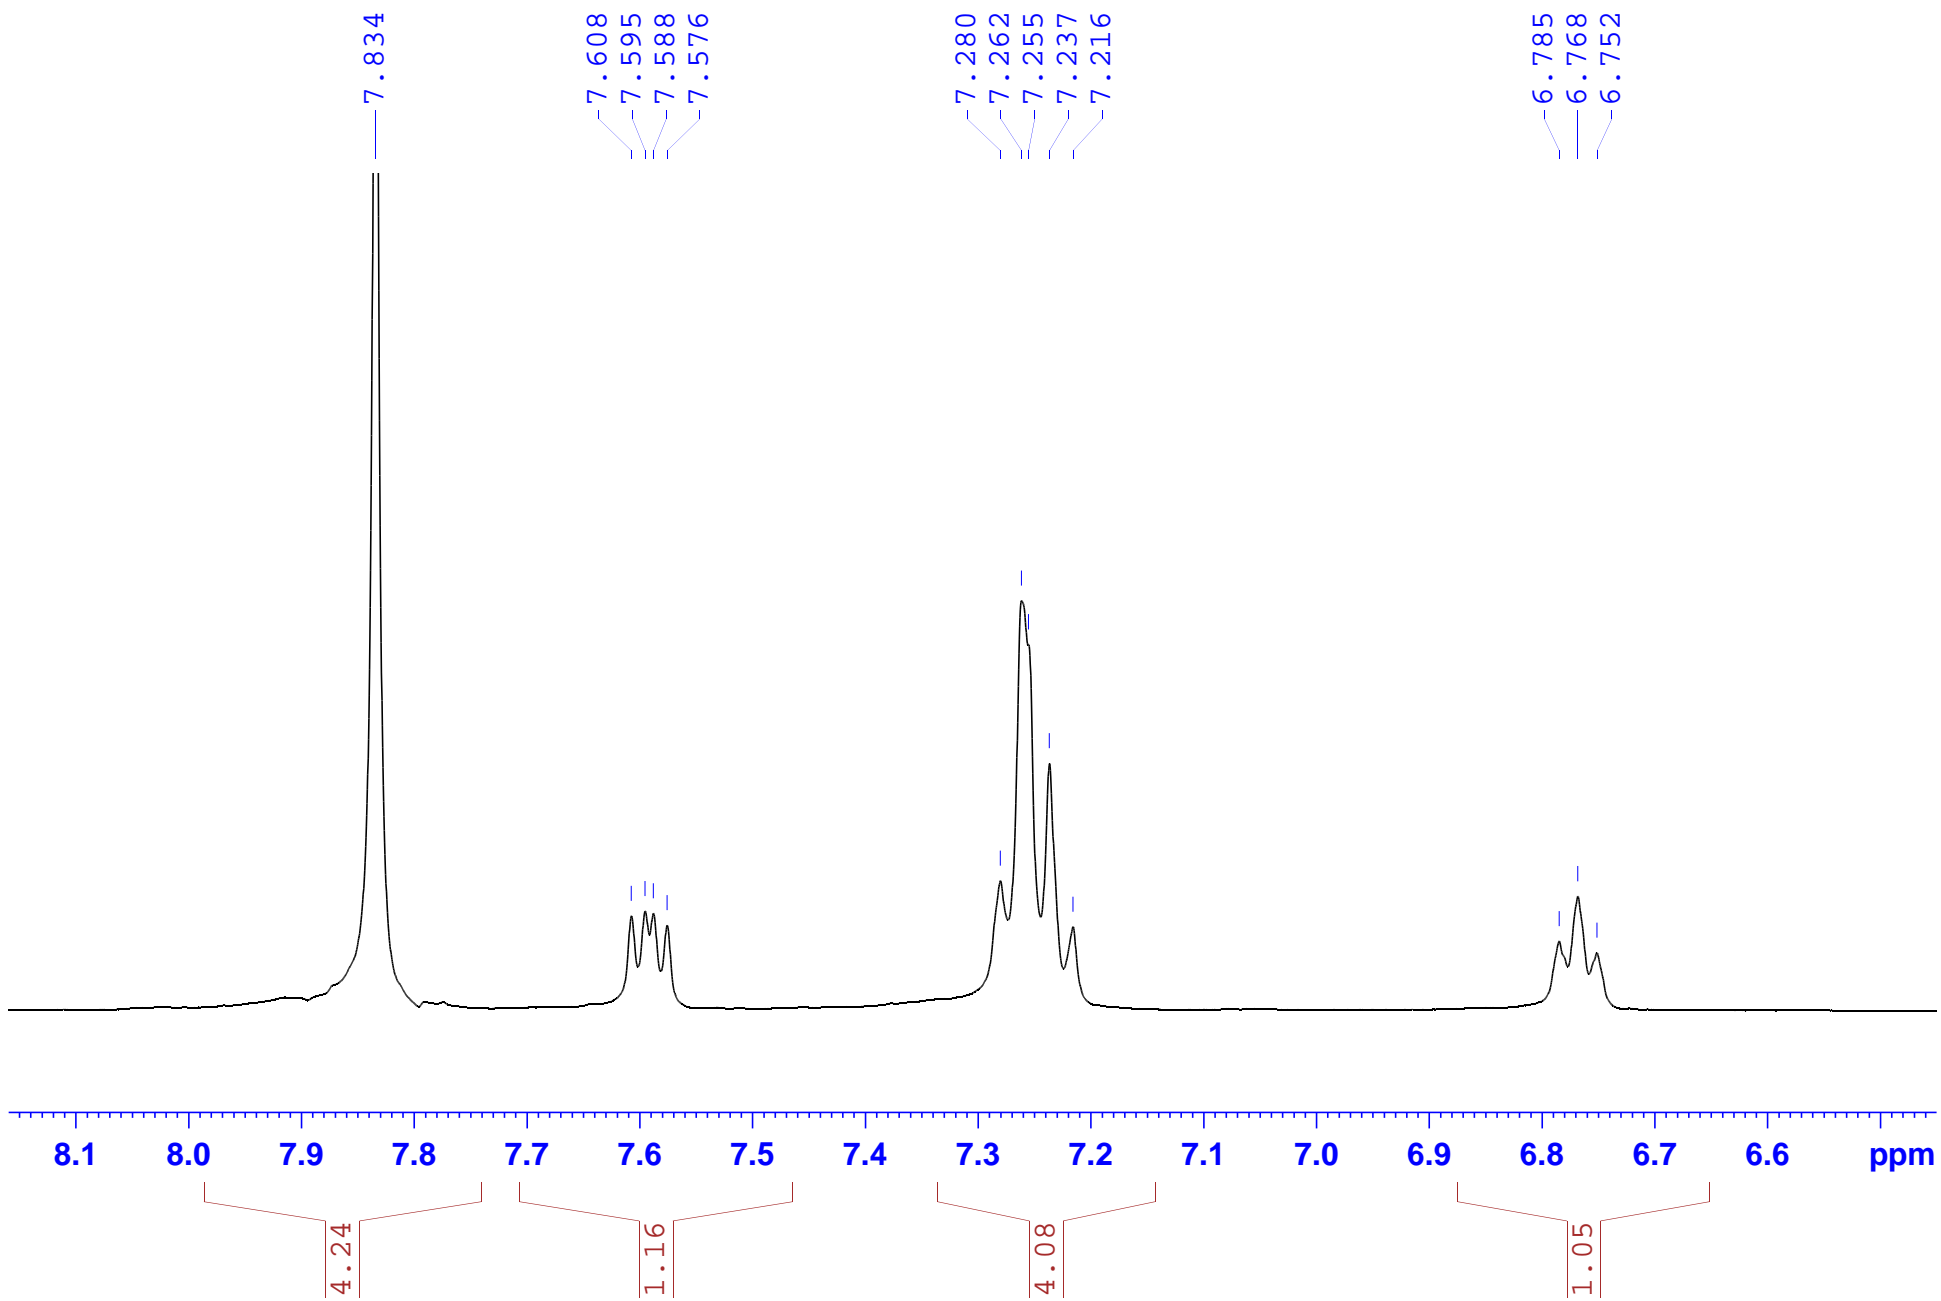

Wagdy El Dahna-RB 8-DMSO-Hnmr-A

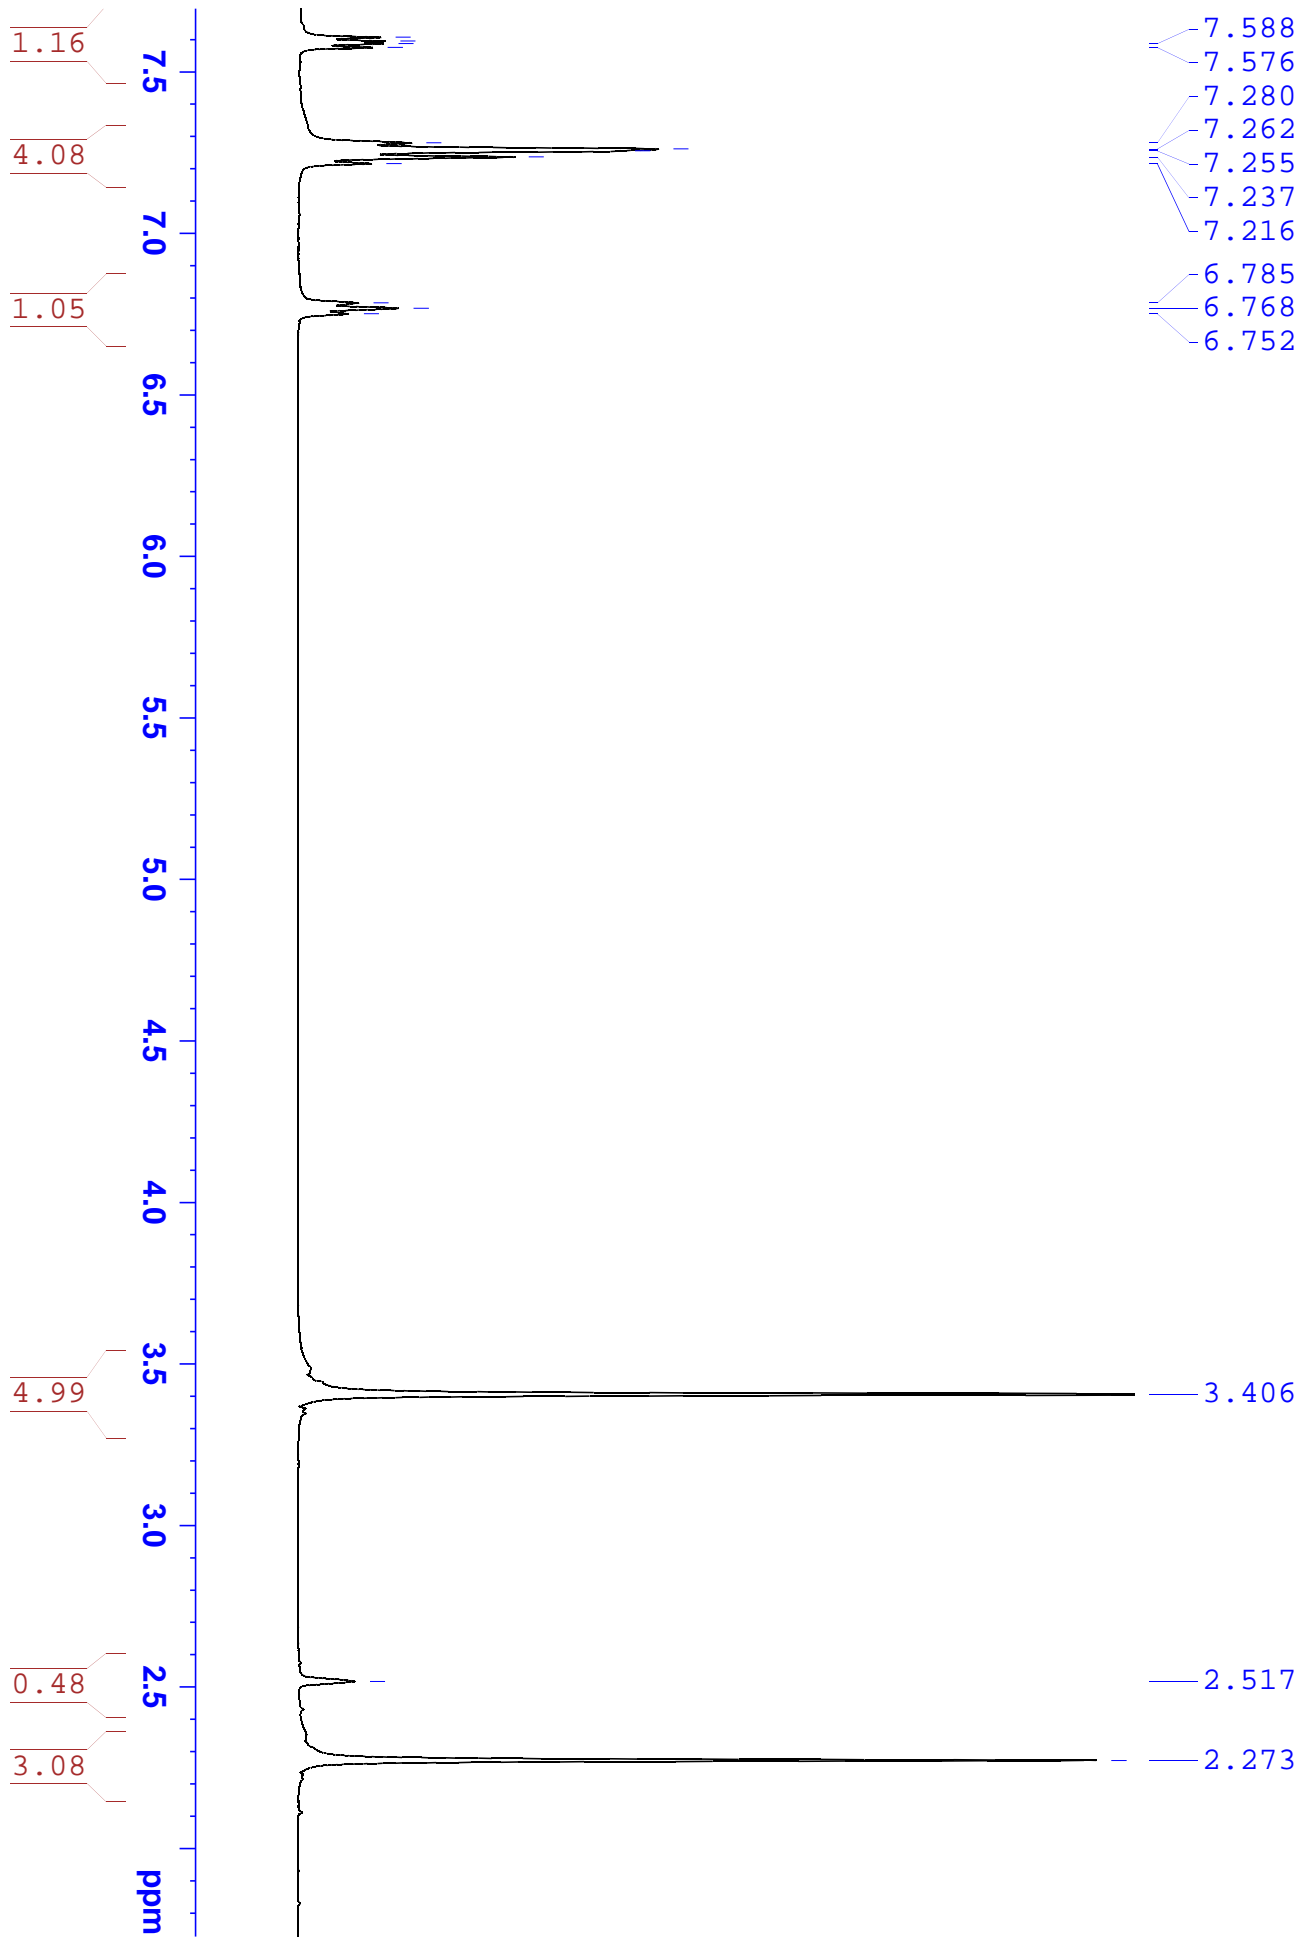

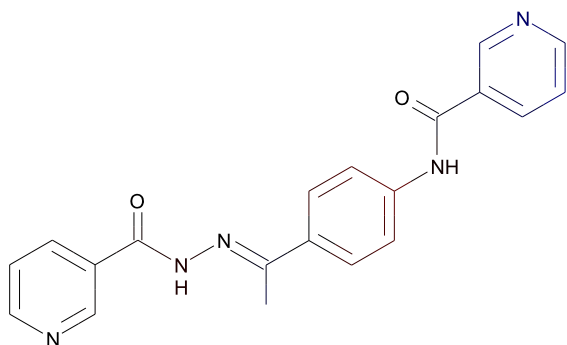

$C_{20}H_{17}N_5O_2$

Molecular Weight: 359.38128

ALogP: 1.147

Rotatable Bonds: 5

Acceptors: 5

Donors: 2

## Model Prediction

Prediction: Non-Mutagen

Probability: 0.716

Enrichment: 1.28

Bayesian Score: -1.11

Mahalanobis Distance: 7.98

Mahalanobis Distance p-value: 0.993

Prediction: Positive if the Bayesian score is above the estimated best cutoff value from minimizing the false positive and false negative rate.

Probability: The estimated probability that the sample is in the positive category. This assumes that the Bayesian score follows a normal distribution and is different from the prediction using a cutoff.

Enrichment: An estimate of enrichment, that is, the increased likelihood (versus random) of this sample being in the category.

Bayesian Score: The standard Laplacian-modified Bayesian score.

Mahalanobis Distance: The Mahalanobis distance (MD) is the distance to the center of the training data. The larger the MD, the less trustworthy the prediction.

Mahalanobis Distance p-value: The p-value gives the fraction of training data with an MD greater than or equal to the one for the given sample, assuming normally distributed data. The smaller the p-value, the less trustworthy the prediction. For highly non-normal X properties (e.g., fingerprints), the MD p-value is wildly inaccurate.

## Structural Similar Compounds

| Name               | 77-46-3                                          | 79455-30-4                                       | PENICILLIN G POTASSIUM |
|--------------------|--------------------------------------------------|--------------------------------------------------|------------------------|
| Structure          |                                                  |                                                  |                        |
| Actual Endpoint    | Non-Mutagen                                      | Non-Mutagen                                      | Non-Mutagen            |
| Predicted Endpoint | Non-Mutagen                                      | Non-Mutagen                                      | Non-Mutagen            |
| Distance           | 0.549                                            | 0.570                                            | 0.581                  |
| Reference          | Kazius et. al., J. Med. Chem. (2005) 48, 312-320 | Kazius et. al., J. Med. Chem. (2005) 48, 312-320 | EMIC                   |

## Model Applicability

Unknown features are fingerprint features in the query molecule, but not found or appearing too infrequently in the training set.

1. All properties and OPS components are within expected ranges.

## Feature Contribution

### Top features for positive contribution

| Fingerprint | Bit/Smiles | Feature Structure                                                       | Score | Mutagen in training set |
|-------------|------------|-------------------------------------------------------------------------|-------|-------------------------|
| SCFP_12     | 555539852  | <br>[*]:[cH]:[c](:[cH]:[*]<br>)C(=O)N[c]1:[cH]:[c<br>H]:[*]:[cH]:[cH]:1 | 0.447 | 22 out of 24            |

|                                               |                   |                                                                                                                                                       |              |                                |
|-----------------------------------------------|-------------------|-------------------------------------------------------------------------------------------------------------------------------------------------------|--------------|--------------------------------|
| SCFP_12                                       | 818445224         | 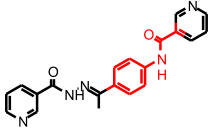<br>[*][c]1:[cH]:[cH]:[c]<br>(NC(=O)[c](:[*]):[*]<br>):[cH]:[cH]:1 | 0.434        | 12 out of 13                   |
| SCFP_12                                       | 2096901122        | <br>[*]:[cH]:[c](NC(=O)[c]<br>):[*]:[*]:[cH]:[*]<br>]              | 0.429        | 33 out of 37                   |
| <b>Top Features for negative contribution</b> |                   |                                                                                                                                                       |              |                                |
| <b>Fingerprint</b>                            | <b>Bit/Smiles</b> | <b>Feature Structure</b>                                                                                                                              | <b>Score</b> | <b>Mutagen in training set</b> |
| SCFP_12                                       | 1165971455        | <br>[*]NC(=O)[c]1:[cH]:[c<br>H]:[cH]:n:[cH]:1                      | -0.762       | 0 out of 2                     |
| SCFP_12                                       | 903335088         | <br>[*]NC(=O)[c]1:[cH]:[c<br>H]:[*]:n:[cH]:1                     | -0.762       | 0 out of 2                     |
| SCFP_12                                       | -331724199        | <br>[*]N=C(/C)[c](:[*]<br>):[*]                                  | -0.762       | 0 out of 2                     |

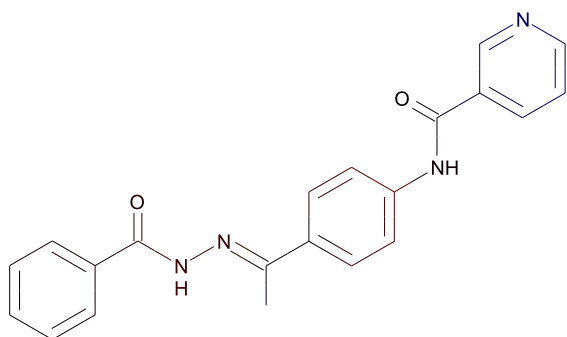

$C_{21}H_{18}N_4O_2$   
 Molecular Weight: 358.39322  
 ALogP: 2.297  
 Rotatable Bonds: 5  
 Acceptors: 4  
 Donors: 2

### Model Prediction

Prediction: Non-Mutagen

Probability: 0.724

Enrichment: 1.3

Bayesian Score: -0.747

Mahalanobis Distance: 7.86

Mahalanobis Distance p-value: 0.996

Prediction: Positive if the Bayesian score is above the estimated best cutoff value from minimizing the false positive and false negative rate.

Probability: The estimated probability that the sample is in the positive category. This assumes that the Bayesian score follows a normal distribution and is different from the prediction using a cutoff.

Enrichment: An estimate of enrichment, that is, the increased likelihood (versus random) of this sample being in the category.  
 Bayesian Score: The standard Laplacian-modified Bayesian score.

Mahalanobis Distance: The Mahalanobis distance (MD) is the distance to the center of the training data. The larger the MD, the less trustworthy the prediction.

Mahalanobis Distance p-value: The p-value gives the fraction of training data with an MD greater than or equal to the one for the given sample, assuming normally distributed data. The smaller the p-value, the less trustworthy the prediction. For highly non-normal X properties (e.g., fingerprints), the MD p-value is wildly inaccurate.

### Structural Similar Compounds

| Name               | 34433-31-3                                       | 89459-43-8                                       | 89784-39-4                                       |
|--------------------|--------------------------------------------------|--------------------------------------------------|--------------------------------------------------|
| Structure          |                                                  |                                                  |                                                  |
| Actual Endpoint    | Non-Mutagen                                      | Mutagen                                          | Mutagen                                          |
| Predicted Endpoint | Non-Mutagen                                      | Mutagen                                          | Mutagen                                          |
| Distance           | 0.499                                            | 0.548                                            | 0.562                                            |
| Reference          | Kazius et. al., J. Med. Chem. (2005) 48, 312-320 | Kazius et. al., J. Med. Chem. (2005) 48, 312-320 | Kazius et. al., J. Med. Chem. (2005) 48, 312-320 |

### Model Applicability

Unknown features are fingerprint features in the query molecule, but not found or appearing too infrequently in the training set.

- All properties and OPS components are within expected ranges.

### Feature Contribution

#### Top features for positive contribution

| Fingerprint | Bit/Smiles | Feature Structure                                                            | Score | Mutagen in training set |
|-------------|------------|------------------------------------------------------------------------------|-------|-------------------------|
| SCFP_12     | 555539852  | <br><chem>[*]:[cH]:[c](:[cH]:[*])C(=O)N[c]1:[cH]:[cH]:[*]:[cH]:[cH]:1</chem> | 0.447 | 22 out of 24            |

|                                               |                   |                                                                                                                                                       |              |                                |
|-----------------------------------------------|-------------------|-------------------------------------------------------------------------------------------------------------------------------------------------------|--------------|--------------------------------|
| SCFP_12                                       | 818445224         | 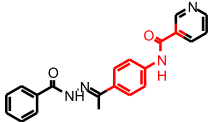<br>[*][c]1:[cH]:[cH]:[c]<br>(NC(=O)[c](:[*]):[*]<br>):[cH]:[cH]:1 | 0.434        | 12 out of 13                   |
| SCFP_12                                       | 2096901122        | <br>[*]:[cH]:[c](NC(=O)[c<br>](:[*]):[*]):[cH]:[*<br>]             | 0.429        | 33 out of 37                   |
| <b>Top Features for negative contribution</b> |                   |                                                                                                                                                       |              |                                |
| <b>Fingerprint</b>                            | <b>Bit/Smiles</b> | <b>Feature Structure</b>                                                                                                                              | <b>Score</b> | <b>Mutagen in training set</b> |
| SCFP_12                                       | -331724199        | <br>[*]N=C(/C)[c](:[*])<br>:[*]                                    | -0.762       | 0 out of 2                     |
| SCFP_12                                       | 1165971455        | <br>[*]NC(=O)[c]1:[cH]:[c<br>H]:[cH]:n:[cH]:1                    | -0.762       | 0 out of 2                     |
| SCFP_12                                       | 903335088         | <br>[*]NC(=O)[c]1:[cH]:[c<br>H]:[*]:n:[cH]:1                     | -0.762       | 0 out of 2                     |

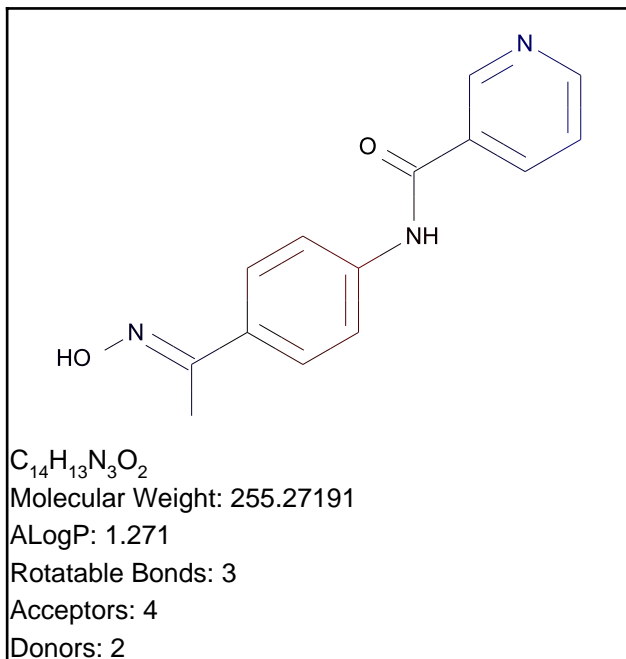

### Model Prediction

Prediction: Non-Mutagen

Probability: 0.718

Enrichment: 1.29

Bayesian Score: -1.02

Mahalanobis Distance: 7.73

Mahalanobis Distance p-value: 0.998

Prediction: Positive if the Bayesian score is above the estimated best cutoff value from minimizing the false positive and false negative rate.

Probability: The estimated probability that the sample is in the positive category. This assumes that the Bayesian score follows a normal distribution and is different from the prediction using a cutoff.

Enrichment: An estimate of enrichment, that is, the increased likelihood (versus random) of this sample being in the category.

Bayesian Score: The standard Laplacian-modified Bayesian score.

Mahalanobis Distance: The Mahalanobis distance (MD) is the distance to the center of the training data. The larger the MD, the less trustworthy the prediction.

Mahalanobis Distance p-value: The p-value gives the fraction of training data with an MD greater than or equal to the one for the given sample, assuming normally distributed data. The smaller the p-value, the less trustworthy the prediction. For highly non-normal X properties (e.g., fingerprints), the MD p-value is wildly inaccurate.

### Structural Similar Compounds

| Name               | Cycloheximide                                                                       | 2687-41-4                                                                           | 19077-98-6                                                                          |
|--------------------|-------------------------------------------------------------------------------------|-------------------------------------------------------------------------------------|-------------------------------------------------------------------------------------|
| Structure          | 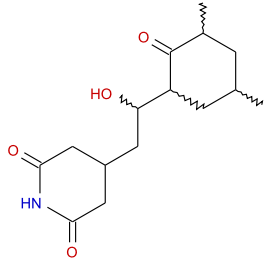 |  |  |
| Actual Endpoint    | Non-Mutagen                                                                         | Mutagen                                                                             | Non-Mutagen                                                                         |
| Predicted Endpoint | Non-Mutagen                                                                         | Mutagen                                                                             | Non-Mutagen                                                                         |
| Distance           | 0.518                                                                               | 0.518                                                                               | 0.526                                                                               |
| Reference          | Environ. Mol. Mut. 19(21):1992                                                      | Kazius et. al., J. Med. Chem. (2005) 48, 312-320                                    | Kazius et. al., J. Med. Chem. (2005) 48, 312-320                                    |

### Model Applicability

Unknown features are fingerprint features in the query molecule, but not found or appearing too infrequently in the training set.

1. All properties and OPS components are within expected ranges.

### Feature Contribution

#### Top features for positive contribution

| Fingerprint | Bit/Smiles | Feature Structure                                                                                                                                                 | Score | Mutagen in training set |
|-------------|------------|-------------------------------------------------------------------------------------------------------------------------------------------------------------------|-------|-------------------------|
| SCFP_12     | 555539852  | 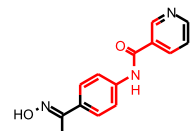<br><chem>[*]:[cH]:[c](:[cH]:[*])C(=O)N[c]1:[cH]:[cH]:[*]:[cH]:[cH]:1</chem> | 0.447 | 22 out of 24            |

|                                               |                   |                                                                                                                                                           |              |                                |
|-----------------------------------------------|-------------------|-----------------------------------------------------------------------------------------------------------------------------------------------------------|--------------|--------------------------------|
| SCFP_12                                       | 818445224         | 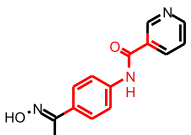<br><chem>[*][c]1:[cH]:[cH]:[c](NC(=O)[c](:[*]):[*])[cH]:[cH]:1</chem> | 0.434        | 12 out of 13                   |
| SCFP_12                                       | 2096901122        | <br><chem>[*]:[cH]:[c](NC(=O)[c](:[*]):[*])[cH]:[*]</chem>             | 0.429        | 33 out of 37                   |
| <b>Top Features for negative contribution</b> |                   |                                                                                                                                                           |              |                                |
| <b>Fingerprint</b>                            | <b>Bit/Smiles</b> | <b>Feature Structure</b>                                                                                                                                  | <b>Score</b> | <b>Mutagen in training set</b> |
| SCFP_12                                       | 1165971455        | <br><chem>[*]NC(=O)[c]1:[cH]:[cH]:[cH]:[cH]:n:[cH]:1</chem>            | -0.762       | 0 out of 2                     |
| SCFP_12                                       | -331724199        | <br><chem>[*]N=C(/C)[c](:[*]):[*]</chem>                             | -0.762       | 0 out of 2                     |
| SCFP_12                                       | 903335088         | <br><chem>[*]NC(=O)[c]1:[cH]:[cH]:[cH]:[cH]:n:[cH]:1</chem>          | -0.762       | 0 out of 2                     |



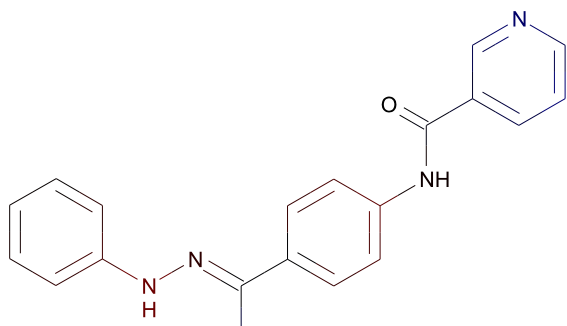

$C_{20}H_{18}N_4O$

Molecular Weight: 330.38312

ALogP: 3.063

Rotatable Bonds: 5

Acceptors: 4

Donors: 2

## Model Prediction

**Prediction: Mutagen**

Probability: 0.75

Enrichment: 1.34

Bayesian Score: 0.586

Mahalanobis Distance: 8.09

Mahalanobis Distance p-value: 0.989

Prediction: Positive if the Bayesian score is above the estimated best cutoff value from minimizing the false positive and false negative rate.

Probability: The estimated probability that the sample is in the positive category. This assumes that the Bayesian score follows a normal distribution and is different from the prediction using a cutoff.

Enrichment: An estimate of enrichment, that is, the increased likelihood (versus random) of this sample being in the category.

Bayesian Score: The standard Laplacian-modified Bayesian score.

Mahalanobis Distance: The Mahalanobis distance (MD) is the distance to the center of the training data. The larger the MD, the less trustworthy the prediction.

Mahalanobis Distance p-value: The p-value gives the fraction of training data with an MD greater than or equal to the one for the given sample, assuming normally distributed data. The smaller the p-value, the less trustworthy the prediction. For highly non-normal X properties (e.g., fingerprints), the MD p-value is wildly inaccurate.

## Structural Similar Compounds

| Name               | 4394-00-7                                        | Phenmedipham                   | 112022-13-6                                      |
|--------------------|--------------------------------------------------|--------------------------------|--------------------------------------------------|
| Structure          |                                                  |                                |                                                  |
| Actual Endpoint    | Non-Mutagen                                      | Mutagen                        | Mutagen                                          |
| Predicted Endpoint | Non-Mutagen                                      | Mutagen                        | Mutagen                                          |
| Distance           | 0.528                                            | 0.535                          | 0.538                                            |
| Reference          | Kazius et. al., J. Med. Chem. (2005) 48, 312-320 | Environ. Mol. Mut. 19(21):1992 | Kazius et. al., J. Med. Chem. (2005) 48, 312-320 |

## Model Applicability

Unknown features are fingerprint features in the query molecule, but not found or appearing too infrequently in the training set.

1. All properties and OPS components are within expected ranges.

## Feature Contribution

### Top features for positive contribution

| Fingerprint | Bit/Smiles | Feature Structure                                                   | Score | Mutagen in training set |
|-------------|------------|---------------------------------------------------------------------|-------|-------------------------|
| SCFP_12     | 555539852  | <br>[*]:[cH]:[c]:[cH]:[*]<br>])C(=O)N[c]1:[cH]:[cH]:[*]:[cH]:[cH]:1 | 0.447 | 22 out of 24            |

|                                               |                   |                                                                                                                                                           |              |                                |
|-----------------------------------------------|-------------------|-----------------------------------------------------------------------------------------------------------------------------------------------------------|--------------|--------------------------------|
| SCFP_12                                       | 818445224         | 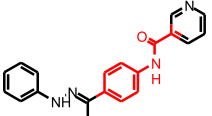<br><chem>[*][c]1:[cH]:[cH]:[c](NC(=O)[c](:[*]):[*])[cH]:[cH]:1</chem> | 0.434        | 12 out of 13                   |
| SCFP_12                                       | 124026986         | <br><chem>[*]:[cH]:[c](:[cH]:[*])C(=O)N[c](:[*]):[*]</chem>            | 0.429        | 33 out of 37                   |
| <b>Top Features for negative contribution</b> |                   |                                                                                                                                                           |              |                                |
| <b>Fingerprint</b>                            | <b>Bit/Smiles</b> | <b>Feature Structure</b>                                                                                                                                  | <b>Score</b> | <b>Mutagen in training set</b> |
| SCFP_12                                       | 1165971455        | <br><chem>[*]NC(=O)[c]1:[cH]:[cH]:[cH]:[cH]:n:[cH]:1</chem>            | -0.762       | 0 out of 2                     |
| SCFP_12                                       | -331724199        | <br><chem>[*]N=C(/C)[c](:[*]):[*]</chem>                             | -0.762       | 0 out of 2                     |
| SCFP_12                                       | 903335088         | <br><chem>[*]NC(=O)[c]1:[cH]:[cH]:[cH]:[cH]:n:[cH]:1</chem>          | -0.762       | 0 out of 2                     |

# Sorafenib

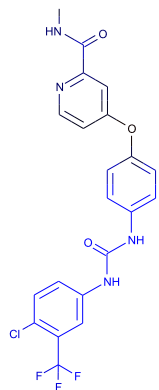

$C_{21}H_{16}ClF_3N_4O_3$   
 Molecular Weight: 464.82494  
 ALogP: 4.175  
 Rotatable Bonds: 6  
 Acceptors: 4  
 Donors: 3

## Model Prediction

Prediction: Non-Mutagen

Probability: 0.0531

Enrichment: 0.0951

Bayesian Score: -19.7

Mahalanobis Distance: 13.1

Mahalanobis Distance p-value: 2.73e-006

Prediction: Positive if the Bayesian score is above the estimated best cutoff value from minimizing the false positive and false negative rate.

Probability: The estimated probability that the sample is in the positive category. This assumes that the Bayesian score follows a normal distribution and is different from the prediction using a cutoff.

Enrichment: An estimate of enrichment, that is, the increased likelihood (versus random) of this sample being in the category.

Bayesian Score: The standard Laplacian-modified Bayesian score.

Mahalanobis Distance: The Mahalanobis distance (MD) is the distance to the center of the training data. The larger the MD, the less trustworthy the prediction.

Mahalanobis Distance p-value: The p-value gives the fraction of training data with an MD greater than or equal to the one for the given sample, assuming normally distributed data. The smaller the p-value, the less trustworthy the prediction. For highly non-normal X properties (e.g., fingerprints), the MD p-value is wildly inaccurate.

# TOPKAT\_Ames\_Mutagenicity

## Structural Similar Compounds

| Name               | GLYBURIDE   | 38914-96-4                                       | 93957-54-1                                                                                                                                                          |
|--------------------|-------------|--------------------------------------------------|---------------------------------------------------------------------------------------------------------------------------------------------------------------------|
| Structure          |             |                                                  |                                                                                                                                                                     |
| Actual Endpoint    | Non-Mutagen | Mutagen                                          | Non-Mutagen                                                                                                                                                         |
| Predicted Endpoint | Non-Mutagen | Mutagen                                          | Non-Mutagen                                                                                                                                                         |
| Distance           | 0.590       | 0.592                                            | 0.600                                                                                                                                                               |
| Reference          | PDR 1994    | Kazius et. al., J. Med. Chem. (2005) 48, 312-320 | US Environmental Protection Agency at <a href="http://www.epa.gov/NCCT/dsstox/sdf_isscan_external.html">http://www.epa.gov/NCCT/dsstox/sdf_isscan_external.html</a> |

## Model Applicability

Unknown features are fingerprint features in the query molecule, but not found or appearing too infrequently in the training set.

- All properties and OPS components are within expected ranges.

## Feature Contribution

### Top features for positive contribution

| Fingerprint | Bit/Smiles | Feature Structure                                                      | Score | Mutagen in training set |
|-------------|------------|------------------------------------------------------------------------|-------|-------------------------|
| SCFP_12     | 347281112  | <br><chem>[*]N[c]1:[cH]:[*]:[c]([*]):[c](:[cH]:1)C([*])([*])[*]</chem> | 0.337 | 18 out of 22            |



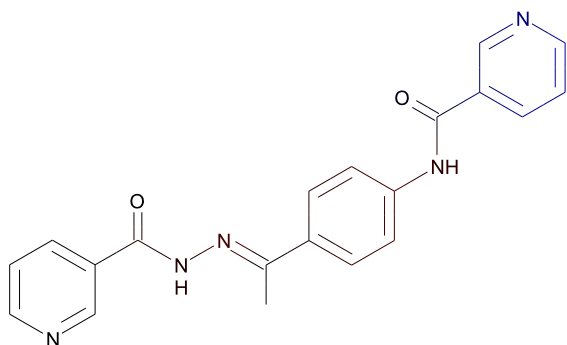

$C_{20}H_{17}N_5O_2$

Molecular Weight: 359.38128

ALogP: 1.147

Rotatable Bonds: 5

Acceptors: 5

Donors: 2

## Model Prediction

Prediction: Non-Carcinogen

Probability: 0.242

Enrichment: 0.755

Bayesian Score: -1.2

Mahalanobis Distance: 11

Mahalanobis Distance p-value: 0.0949

Prediction: Positive if the Bayesian score is above the estimated best cutoff value from minimizing the false positive and false negative rate.

Probability: The estimated probability that the sample is in the positive category. This assumes that the Bayesian score follows a normal distribution and is different from the prediction using a cutoff.

Enrichment: An estimate of enrichment, that is, the increased likelihood (versus random) of this sample being in the category.

Bayesian Score: The standard Laplacian-modified Bayesian score.

Mahalanobis Distance: The Mahalanobis distance (MD) is the distance to the center of the training data. The larger the MD, the less trustworthy the prediction.

Mahalanobis Distance p-value: The p-value gives the fraction of training data with an MD greater than or equal to the one for the given sample, assuming normally distributed data. The smaller the p-value, the less trustworthy the prediction. For highly non-normal X properties (e.g., fingerprints), the MD p-value is wildly inaccurate.

## Structural Similar Compounds

| Name               | Acetohexamide                                                       | Alizapride                                                          | Penicillin                                                          |
|--------------------|---------------------------------------------------------------------|---------------------------------------------------------------------|---------------------------------------------------------------------|
| Structure          |                                                                     |                                                                     |                                                                     |
| Actual Endpoint    | Non-Carcinogen                                                      | Carcinogen                                                          | Non-Carcinogen                                                      |
| Predicted Endpoint | Non-Carcinogen                                                      | Carcinogen                                                          | Non-Carcinogen                                                      |
| Distance           | 0.578                                                               | 0.581                                                               | 0.603                                                               |
| Reference          | US FDA (Centre for Drug Eval.& Res./Off. Testing & Res.) Sept. 1997 | US FDA (Centre for Drug Eval.& Res./Off. Testing & Res.) Sept. 1997 | US FDA (Centre for Drug Eval.& Res./Off. Testing & Res.) Sept. 1997 |

## Model Applicability

Unknown features are fingerprint features in the query molecule, but not found or appearing too infrequently in the training set.

1. All properties and OPS components are within expected ranges.
2. Unknown ECFP\_2 feature: 128986386: [\*]N=C(/C)\[c](:[\*]):[\*]
3. Unknown ECFP\_2 feature: 560380707: [\*]NN=C([\*])[\*]

## Feature Contribution

### Top features for positive contribution

| Fingerprint | Bit/Smiles | Feature Structure | Score | Carcinogen in training set |
|-------------|------------|-------------------|-------|----------------------------|
| ECFP_6      | 1087070950 | <br>[*]N=[*]      | 0.724 | 10 out of 14               |

|                                               |                   |                                                                                                                                               |              |                                   |
|-----------------------------------------------|-------------------|-----------------------------------------------------------------------------------------------------------------------------------------------|--------------|-----------------------------------|
| ECFP_6                                        | 544048674         | 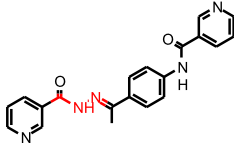<br><chem>[*]C(=[*])NN=[*]</chem>                          | 0.617        | 2 out of 2                        |
| ECFP_6                                        | 738938915         | <br><chem>[*]C(=[*])N[c]1:[cH]:[cH]:[*]:[cH]:[cH]:1</chem> | 0.617        | 2 out of 2                        |
| <b>Top Features for negative contribution</b> |                   |                                                                                                                                               |              |                                   |
| <b>Fingerprint</b>                            | <b>Bit/Smiles</b> | <b>Feature Structure</b>                                                                                                                      | <b>Score</b> | <b>Carcinogen in training set</b> |
| ECFP_6                                        | 2013347047        | <br><chem>[*][c]1:[*]:n:[cH]:[cH]:[cH]:1</chem>            | -0.805       | 0 out of 4                        |
| ECFP_6                                        | 764951226         | <br><chem>[*]1:[cH]:[cH]:[cH]:n:[cH]:1</chem>             | -0.482       | 0 out of 2                        |
| ECFP_6                                        | -1818873508       | <br><chem>[*][c]1:[cH]:[cH]:[cH]:n:[cH]:1</chem>         | -0.482       | 0 out of 2                        |

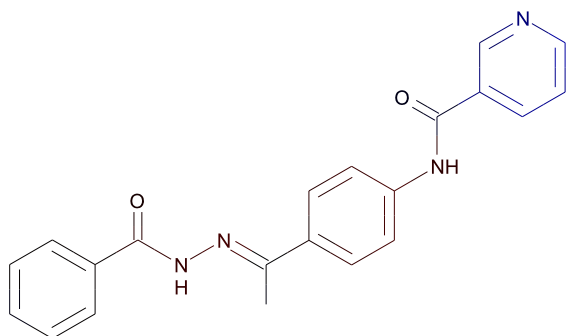

$C_{21}H_{18}N_4O_2$

Molecular Weight: 358.39322

ALogP: 2.297

Rotatable Bonds: 5

Acceptors: 4

Donors: 2

## Model Prediction

Prediction: Non-Carcinogen

Probability: 0.231

Enrichment: 0.721

Bayesian Score: -1.96

Mahalanobis Distance: 11.7

Mahalanobis Distance p-value: 0.0236

Prediction: Positive if the Bayesian score is above the estimated best cutoff value from minimizing the false positive and false negative rate.

Probability: The estimated probability that the sample is in the positive category. This assumes that the Bayesian score follows a normal distribution and is different from the prediction using a cutoff.

Enrichment: An estimate of enrichment, that is, the increased likelihood (versus random) of this sample being in the category.

Bayesian Score: The standard Laplacian-modified Bayesian score.

Mahalanobis Distance: The Mahalanobis distance (MD) is the distance to the center of the training data. The larger the MD, the less trustworthy the prediction.

Mahalanobis Distance p-value: The p-value gives the fraction of training data with an MD greater than or equal to the one for the given sample, assuming normally distributed data. The smaller the p-value, the less trustworthy the prediction. For highly non-normal X properties (e.g., fingerprints), the MD p-value is wildly inaccurate.

## Structural Similar Compounds

| Name               | Mebendazole                                                         | Alizapride                                                          | Indapamide                                                          |
|--------------------|---------------------------------------------------------------------|---------------------------------------------------------------------|---------------------------------------------------------------------|
| Structure          |                                                                     |                                                                     |                                                                     |
| Actual Endpoint    | Non-Carcinogen                                                      | Carcinogen                                                          | Non-Carcinogen                                                      |
| Predicted Endpoint | Non-Carcinogen                                                      | Carcinogen                                                          | Non-Carcinogen                                                      |
| Distance           | 0.570                                                               | 0.601                                                               | 0.601                                                               |
| Reference          | US FDA (Centre for Drug Eval.& Res./Off. Testing & Res.) Sept. 1997 | US FDA (Centre for Drug Eval.& Res./Off. Testing & Res.) Sept. 1997 | US FDA (Centre for Drug Eval.& Res./Off. Testing & Res.) Sept. 1997 |

## Model Applicability

Unknown features are fingerprint features in the query molecule, but not found or appearing too infrequently in the training set.

1. All properties and OPS components are within expected ranges.
2. Unknown ECFP\_2 feature: 128986386: [\*]N=C(/C)\[c](:[\*]):[\*]
3. Unknown ECFP\_2 feature: 560380707: [\*]NN=C([\*])[\*]

## Feature Contribution

### Top features for positive contribution

| Fingerprint | Bit/Smiles | Feature Structure | Score | Carcinogen in training set |
|-------------|------------|-------------------|-------|----------------------------|
| ECFP_6      | 1087070950 | <br>[*]N=[*]      | 0.724 | 10 out of 14               |

|                                               |                   |                                                                                                                                                    |              |                                   |
|-----------------------------------------------|-------------------|----------------------------------------------------------------------------------------------------------------------------------------------------|--------------|-----------------------------------|
| ECFP_6                                        | 544048674         | 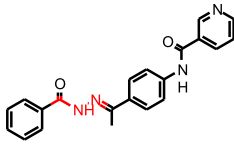<br><chem>[*]C(=[*])NN=[*]</chem>                               | 0.617        | 2 out of 2                        |
| ECFP_6                                        | 738938915         | <br><chem>[*]C(=[*])N[c]1:[cH]:[cH]:[*]:[cH]:[cH]:[cH]:1</chem> | 0.617        | 2 out of 2                        |
| <b>Top Features for negative contribution</b> |                   |                                                                                                                                                    |              |                                   |
| <b>Fingerprint</b>                            | <b>Bit/Smiles</b> | <b>Feature Structure</b>                                                                                                                           | <b>Score</b> | <b>Carcinogen in training set</b> |
| ECFP_6                                        | 2013347047        | <br><chem>[*][c]1:[*]:n:[cH]:[cH]:[cH]:[cH]:1</chem>            | -0.805       | 0 out of 4                        |
| ECFP_6                                        | 764951226         | <br><chem>[*]1:[cH]:[cH]:[cH]:n:[cH]:1</chem>                  | -0.482       | 0 out of 2                        |
| ECFP_6                                        | -1818873508       | <br><chem>[*][c]1:[cH]:[cH]:[cH]:[cH]:n:[cH]:1</chem>         | -0.482       | 0 out of 2                        |



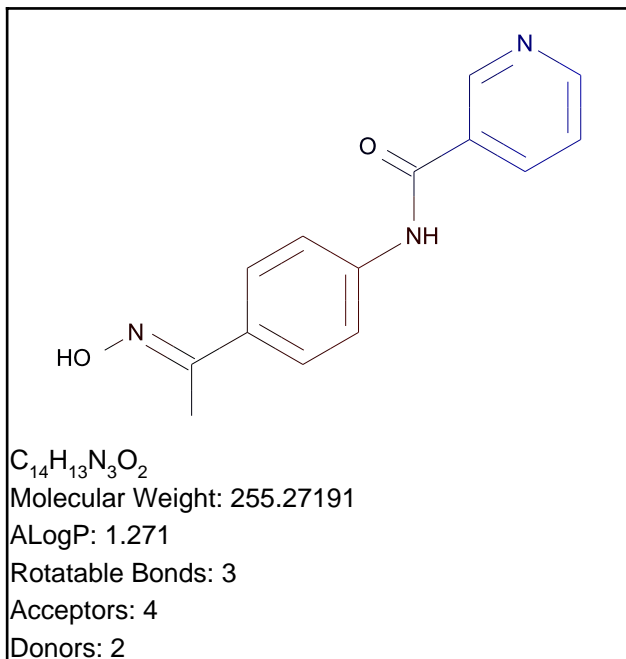

### Model Prediction

Prediction: Non-Carcinogen

Probability: 0.233

Enrichment: 0.726

Bayesian Score: -1.83

Mahalanobis Distance: 10.9

Mahalanobis Distance p-value: 0.121

Prediction: Positive if the Bayesian score is above the estimated best cutoff value from minimizing the false positive and false negative rate.

Probability: The estimated probability that the sample is in the positive category. This assumes that the Bayesian score follows a normal distribution and is different from the prediction using a cutoff.

Enrichment: An estimate of enrichment, that is, the increased likelihood (versus random) of this sample being in the category.

Bayesian Score: The standard Laplacian-modified Bayesian score.

Mahalanobis Distance: The Mahalanobis distance (MD) is the distance to the center of the training data. The larger the MD, the less trustworthy the prediction.

Mahalanobis Distance p-value: The p-value gives the fraction of training data with an MD greater than or equal to the one for the given sample, assuming normally distributed data. The smaller the p-value, the less trustworthy the prediction. For highly non-normal X properties (e.g., fingerprints), the MD p-value is wildly inaccurate.

### Structural Similar Compounds

| Name               | Tolazamide                                                                          | Phenobarbital                                                                       | Chlorpropamide                                                                      |
|--------------------|-------------------------------------------------------------------------------------|-------------------------------------------------------------------------------------|-------------------------------------------------------------------------------------|
| Structure          | 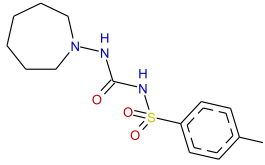 |  |  |
| Actual Endpoint    | Non-Carcinogen                                                                      | Carcinogen                                                                          | Non-Carcinogen                                                                      |
| Predicted Endpoint | Non-Carcinogen                                                                      | Carcinogen                                                                          | Non-Carcinogen                                                                      |
| Distance           | 0.576                                                                               | 0.586                                                                               | 0.591                                                                               |
| Reference          | US FDA (Centre for Drug Eval.& Res./Off. Testing & Res.) Sept. 1997                 | US FDA (Centre for Drug Eval.& Res./Off. Testing & Res.) Sept. 1997                 | US FDA (Centre for Drug Eval.& Res./Off. Testing & Res.) Sept. 1997                 |

### Model Applicability

Unknown features are fingerprint features in the query molecule, but not found or appearing too infrequently in the training set.

1. All properties and OPS components are within expected ranges.
2. Unknown ECFP\_2 feature: 128986386: [\*]N=C(/C)\[c](:[\*]):[\*]
3. Unknown ECFP\_2 feature: 559672449: [\*]C(=NO)[\*]
4. Unknown ECFP\_2 feature: 2025254696: [\*]=NO

### Feature Contribution

#### Top features for positive contribution

| Fingerprint | Bit/Smiles  | Feature Structure                                                                                 | Score | Carcinogen in training set |
|-------------|-------------|---------------------------------------------------------------------------------------------------|-------|----------------------------|
| ECFP_6      | -1087070950 | 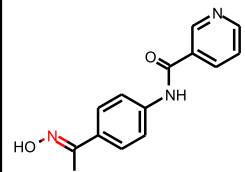<br>[*]N=[*] | 0.724 | 10 out of 14               |

|                                               |                   |                                                                                                                                                  |              |                                   |
|-----------------------------------------------|-------------------|--------------------------------------------------------------------------------------------------------------------------------------------------|--------------|-----------------------------------|
| ECFP_6                                        | 738938915         | 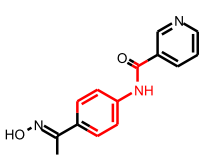<br><chem>[*]C(=*)N[c]1:[cH]:[cH]:[*]:[cH]:[cH]:[cH]:1</chem> | 0.617        | 2 out of 2                        |
| ECFP_6                                        | -177077903        | <br><chem>[*]N[c](:[cH]:[*]):[cH]:[*]</chem>                  | 0.279        | 4 out of 9                        |
| <b>Top Features for negative contribution</b> |                   |                                                                                                                                                  |              |                                   |
| <b>Fingerprint</b>                            | <b>Bit/Smiles</b> | <b>Feature Structure</b>                                                                                                                         | <b>Score</b> | <b>Carcinogen in training set</b> |
| ECFP_6                                        | 2013347047        | <br><chem>[*][c]1:[*]:n:[cH]:[cH]:[cH]:1</chem>               | -0.805       | 0 out of 4                        |
| ECFP_6                                        | -1818873508       | <br><chem>[*][c]1:[cH]:[cH]:[cH]:n:[cH]:1</chem>             | -0.482       | 0 out of 2                        |
| ECFP_6                                        | 764951226         | <br><chem>[*]1:[cH]:[cH]:[cH]:n:[cH]:1</chem>               | -0.482       | 0 out of 2                        |

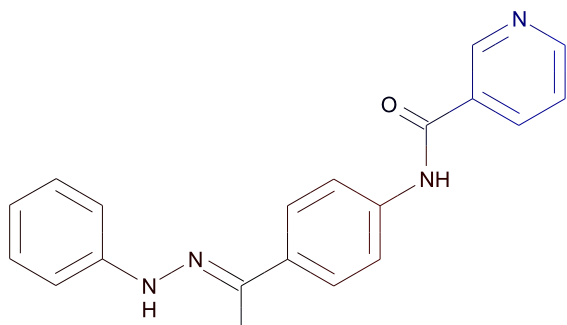

$C_{20}H_{18}N_4O$

Molecular Weight: 330.38312

ALogP: 3.063

Rotatable Bonds: 5

Acceptors: 4

Donors: 2

## Model Prediction

Prediction: Non-Carcinogen

Probability: 0.234

Enrichment: 0.729

Bayesian Score: -1.77

Mahalanobis Distance: 11.7

Mahalanobis Distance p-value: 0.0253

Prediction: Positive if the Bayesian score is above the estimated best cutoff value from minimizing the false positive and false negative rate.

Probability: The estimated probability that the sample is in the positive category. This assumes that the Bayesian score follows a normal distribution and is different from the prediction using a cutoff.

Enrichment: An estimate of enrichment, that is, the increased likelihood (versus random) of this sample being in the category.

Bayesian Score: The standard Laplacian-modified Bayesian score.

Mahalanobis Distance: The Mahalanobis distance (MD) is the distance to the center of the training data. The larger the MD, the less trustworthy the prediction.

Mahalanobis Distance p-value: The p-value gives the fraction of training data with an MD greater than or equal to the one for the given sample, assuming normally distributed data. The smaller the p-value, the less trustworthy the prediction. For highly non-normal X properties (e.g., fingerprints), the MD p-value is wildly inaccurate.

## Structural Similar Compounds

| Name               | Mebendazole                                                         | Bunolol                                                             | Etodolac                                                            |
|--------------------|---------------------------------------------------------------------|---------------------------------------------------------------------|---------------------------------------------------------------------|
| Structure          |                                                                     |                                                                     |                                                                     |
| Actual Endpoint    | Non-Carcinogen                                                      | Carcinogen                                                          | Non-Carcinogen                                                      |
| Predicted Endpoint | Non-Carcinogen                                                      | Carcinogen                                                          | Non-Carcinogen                                                      |
| Distance           | 0.559                                                               | 0.582                                                               | 0.606                                                               |
| Reference          | US FDA (Centre for Drug Eval.& Res./Off. Testing & Res.) Sept. 1997 | US FDA (Centre for Drug Eval.& Res./Off. Testing & Res.) Sept. 1997 | US FDA (Centre for Drug Eval.& Res./Off. Testing & Res.) Sept. 1997 |

## Model Applicability

Unknown features are fingerprint features in the query molecule, but not found or appearing too infrequently in the training set.

1. All properties and OPS components are within expected ranges.
2. Unknown ECFP\_2 feature: 128986386: [\*]N=C(/C)\[c](:[\*]):[\*]
3. Unknown ECFP\_2 feature: 560380707: [\*]NN=C([\*])[\*]
4. Unknown ECFP\_2 feature: -1236714312: [\*]=NN[c](:[\*]):[\*]

## Feature Contribution

### Top features for positive contribution

| Fingerprint | Bit/Smiles  | Feature Structure | Score | Carcinogen in training set |
|-------------|-------------|-------------------|-------|----------------------------|
| ECFP_6      | -1087070950 | <br>[*]N=[*]      | 0.724 | 10 out of 14               |

| ECFP_6                                        | 738938915   | 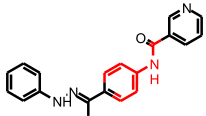<br><chem>[*]C(=*)N[c]1:[cH]:[cH]:[cH]:[*]:[cH]:[cH]:[cH]:1</chem> | 0.617  | 2 out of 2                 |
|-----------------------------------------------|-------------|-------------------------------------------------------------------------------------------------------------------------------------------------------|--------|----------------------------|
| ECFP_6                                        | 547788473   | <br><chem>[*]N[c]1:[cH]:[cH]:[cH]:[cH]:[cH]:[cH]:1</chem>          | 0.424  | 1 out of 1                 |
| <b>Top Features for negative contribution</b> |             |                                                                                                                                                       |        |                            |
| Fingerprint                                   | Bit/Smiles  | Feature Structure                                                                                                                                     | Score  | Carcinogen in training set |
| ECFP_6                                        | 2013347047  | <br><chem>[*][c]1:[*]:n:[cH]:[cH]:[cH]:[cH]:1</chem>               | -0.805 | 0 out of 4                 |
| ECFP_6                                        | -1818873508 | <br><chem>[*][c]1:[cH]:[cH]:[cH]:[cH]:n:[cH]:1</chem>            | -0.482 | 0 out of 2                 |
| ECFP_6                                        | 764951226   | <br><chem>[*]1:[cH]:[cH]:[cH]:n:[cH]:1</chem>                    | -0.482 | 0 out of 2                 |

# Sorafenib

# TOPKAT\_Mouse\_Female\_FDA\_None\_vs\_Carcinogen

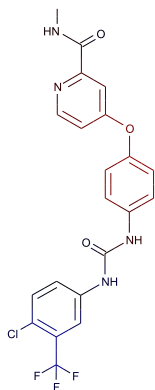

$C_{21}H_{16}ClF_3N_4O_3$

Molecular Weight: 464.82494

ALogP: 4.175

Rotatable Bonds: 6

Acceptors: 4

Donors: 3

## Model Prediction

**Prediction: Carcinogen**

Probability: 0.257

Enrichment: 0.801

Bayesian Score: -0.321

Mahalanobis Distance: 14.9

Mahalanobis Distance p-value: 4.21e-007

Prediction: Positive if the Bayesian score is above the estimated best cutoff value from minimizing the false positive and false negative rate.

Probability: The estimated probability that the sample is in the positive category. This assumes that the Bayesian score follows a normal distribution and is different from the prediction using a cutoff.

Enrichment: An estimate of enrichment, that is, the increased likelihood (versus random) of this sample being in the category.

Bayesian Score: The standard Laplacian-modified Bayesian score.

Mahalanobis Distance: The Mahalanobis distance (MD) is the distance to the center of the training data. The larger the MD, the less trustworthy the prediction.

Mahalanobis Distance p-value: The p-value gives the fraction of training data with an MD greater than or equal to the one for the given sample, assuming normally distributed data. The smaller the p-value, the less trustworthy the prediction. For highly non-normal X properties (e.g., fingerprints), the MD p-value is wildly inaccurate.

## Structural Similar Compounds

| Name               | Glimepiride                                                         | Glyburide                                                           | Fluvastatin                                                         |
|--------------------|---------------------------------------------------------------------|---------------------------------------------------------------------|---------------------------------------------------------------------|
| Structure          |                                                                     |                                                                     |                                                                     |
| Actual Endpoint    | Carcinogen                                                          | Non-Carcinogen                                                      | Non-Carcinogen                                                      |
| Predicted Endpoint | Carcinogen                                                          | Non-Carcinogen                                                      | Non-Carcinogen                                                      |
| Distance           | 0.605                                                               | 0.615                                                               | 0.625                                                               |
| Reference          | US FDA (Centre for Drug Eval.& Res./Off. Testing & Res.) Sept. 1997 | US FDA (Centre for Drug Eval.& Res./Off. Testing & Res.) Sept. 1997 | US FDA (Centre for Drug Eval.& Res./Off. Testing & Res.) Sept. 1997 |

## Model Applicability

Unknown features are fingerprint features in the query molecule, but not found or appearing too infrequently in the training set.

- OPS PC20 out of range. Value: -3.3309. Training min, max, SD, explained variance: -3.1862, 4.4571, 1.28, 0.0167.

## Feature Contribution

### Top features for positive contribution

| Fingerprint | Bit/Smiles | Feature Structure                                                                                                                                                                                                                                                                                                                                                                                                                                                                                                                                                                                                                                                                                                                                                                                                                                                                                                                                                                                                                                                                                                                                                                                                                                                                                                                                                                                                                                                                                                                                                                                                                                                                                                                                                                                                                                                                                                                                                                                                                                                                                                                                                                                                                                                                                                                                                                                                                                                                                                                                                                                                                                                                                                                                                                                                                                                                                                                                                                                                                                                                                                                                                                                                                                                                                                                                                                                                                                                                                                                                                                                                                                                                                                                                                                                                                                                                                                                                                                                                                                                                                                                                                                                                                                                                                                                                                                                                                                                                                                                                                                                                                                                                                                                                                                                                                                                                                                                                                                                                                                                                                                                                                                                                                                                                                                                                                                                                                                                                                                                                                                                                                                                                                                                                                                                                                                                                                                                                                                                                                                                                                                                                                                                                                                                                                                                                                                                                                                                                                                                                                                                                                                                                                                                                                                                                                                                                                                                                                                                                                                                                                                                                                                                                                                                                                                                                                                                                                                                                                                                                                                                                                                                                                                                                                                                                                                                                                                                                                                                                                                                                                                                                                                                                                                                                                                                                                                                                                                                                                                                                                                                                                                                                                                                                                                                                                                                                                                                                                                                                                                                                                                                                                                                                                                                                                                                                                                                                                                                                                                                                                                                                                                                                                                                                                                                                                                                                                                                                                                                                                                                                                                                                                                                                                                                                                                                                                                                                                                                                                                                                                                                                                                                                                                                                                                                                                                                                                                                                                                                                                                                                                                                                                                                                                                                                                                                                                                                                                                                                                                                                                                                                                                                                                                                                                                                                                                                                                                                                                                                                                                                                                                                                                                                                                                                                                                                                                                                                                                                                                                                                                                                                                                                                                                                                                                                                                                                                                                                                                                                                                                                                                                                                                                                                                                                                                                                                                                                                                                                                                                                                                                                                                                                                                                                                                                                                                                                                                                                                                                                                                                                         | Score | Carcinogen in training set |
|-------------|------------|---------------------------------------------------------------------------------------------------------------------------------------------------------------------------------------------------------------------------------------------------------------------------------------------------------------------------------------------------------------------------------------------------------------------------------------------------------------------------------------------------------------------------------------------------------------------------------------------------------------------------------------------------------------------------------------------------------------------------------------------------------------------------------------------------------------------------------------------------------------------------------------------------------------------------------------------------------------------------------------------------------------------------------------------------------------------------------------------------------------------------------------------------------------------------------------------------------------------------------------------------------------------------------------------------------------------------------------------------------------------------------------------------------------------------------------------------------------------------------------------------------------------------------------------------------------------------------------------------------------------------------------------------------------------------------------------------------------------------------------------------------------------------------------------------------------------------------------------------------------------------------------------------------------------------------------------------------------------------------------------------------------------------------------------------------------------------------------------------------------------------------------------------------------------------------------------------------------------------------------------------------------------------------------------------------------------------------------------------------------------------------------------------------------------------------------------------------------------------------------------------------------------------------------------------------------------------------------------------------------------------------------------------------------------------------------------------------------------------------------------------------------------------------------------------------------------------------------------------------------------------------------------------------------------------------------------------------------------------------------------------------------------------------------------------------------------------------------------------------------------------------------------------------------------------------------------------------------------------------------------------------------------------------------------------------------------------------------------------------------------------------------------------------------------------------------------------------------------------------------------------------------------------------------------------------------------------------------------------------------------------------------------------------------------------------------------------------------------------------------------------------------------------------------------------------------------------------------------------------------------------------------------------------------------------------------------------------------------------------------------------------------------------------------------------------------------------------------------------------------------------------------------------------------------------------------------------------------------------------------------------------------------------------------------------------------------------------------------------------------------------------------------------------------------------------------------------------------------------------------------------------------------------------------------------------------------------------------------------------------------------------------------------------------------------------------------------------------------------------------------------------------------------------------------------------------------------------------------------------------------------------------------------------------------------------------------------------------------------------------------------------------------------------------------------------------------------------------------------------------------------------------------------------------------------------------------------------------------------------------------------------------------------------------------------------------------------------------------------------------------------------------------------------------------------------------------------------------------------------------------------------------------------------------------------------------------------------------------------------------------------------------------------------------------------------------------------------------------------------------------------------------------------------------------------------------------------------------------------------------------------------------------------------------------------------------------------------------------------------------------------------------------------------------------------------------------------------------------------------------------------------------------------------------------------------------------------------------------------------------------------------------------------------------------------------------------------------------------------------------------------------------------------------------------------------------------------------------------------------------------------------------------------------------------------------------------------------------------------------------------------------------------------------------------------------------------------------------------------------------------------------------------------------------------------------------------------------------------------------------------------------------------------------------------------------------------------------------------------------------------------------------------------------------------------------------------------------------------------------------------------------------------------------------------------------------------------------------------------------------------------------------------------------------------------------------------------------------------------------------------------------------------------------------------------------------------------------------------------------------------------------------------------------------------------------------------------------------------------------------------------------------------------------------------------------------------------------------------------------------------------------------------------------------------------------------------------------------------------------------------------------------------------------------------------------------------------------------------------------------------------------------------------------------------------------------------------------------------------------------------------------------------------------------------------------------------------------------------------------------------------------------------------------------------------------------------------------------------------------------------------------------------------------------------------------------------------------------------------------------------------------------------------------------------------------------------------------------------------------------------------------------------------------------------------------------------------------------------------------------------------------------------------------------------------------------------------------------------------------------------------------------------------------------------------------------------------------------------------------------------------------------------------------------------------------------------------------------------------------------------------------------------------------------------------------------------------------------------------------------------------------------------------------------------------------------------------------------------------------------------------------------------------------------------------------------------------------------------------------------------------------------------------------------------------------------------------------------------------------------------------------------------------------------------------------------------------------------------------------------------------------------------------------------------------------------------------------------------------------------------------------------------------------------------------------------------------------------------------------------------------------------------------------------------------------------------------------------------------------------------------------------------------------------------------------------------------------------------------------------------------------------------------------------------------------------------------------------------------------------------------------------------------------------------------------------------------------------------------------------------------------------------------------------------------------------------------------------------------------------------------------------------------------------------------------------------------------------------------------------------------------------------------------------------------------------------------------------------------------------------------------------------------------------------------------------------------------------------------------------------------------------------------------------------------------------------------------------------------------------------------------------------------------------------------------------------------------------------------------------------------------------------------------------------------------------------------------------------------------------------------------------------------------------------------------------------------------------------------------------------------------------------------------------------------------------------------------------------------------------------------------------------------------------------------------------------------------------------------------------------------------------------------------------------------------------------------------------------------------------------------------------------------------------------------------------------------------------------------------------------------------------------------------------------------------------------------------------------------------------------------------------------------------------------------------------------------------------------------------------------------------------------------------------------------------------------------------------------------------------------------------------------------------------------------------------------------------------------------------------------------------------------------------------------------------------------------------------------------------------------------------------------------------------------------------------------------------------------------------------------------------------------------------------------------------------------------------------------------------------------------------------------------------------------------------------------------------------------------------------------------------------------------------------------------------------------------------------------------------------------------------------------------------------------------------------------------------------------------------------------------------------------------------------------------------------------------------------------------------------------------------------------------------------------------------------------------------------------------------------------------------------------------------------------------------------------------------------------------------------------------------------------------------------------------------------------------------------------------------------------------------------------------------------------------------------------------------------------------------------------------------------------------------------------------------------------------------------------------------------------------------------------------------------------------------------------------|-------|----------------------------|
| ECFP_6      | 738938915  | <br>[*]C(=[*])N(c1cc(F)c(Cl)cc1)N(c2cc(F)cc2)N(c3cc(F)cc3)N(c4cc(F)cc4)N(c5cc(F)cc5)N(c6cc(F)cc6)N(c7cc(F)cc7)N(c8cc(F)cc8)N(c9cc(F)cc9)N(c10cc(F)cc10)N(c11cc(F)cc11)N(c12cc(F)cc12)N(c13cc(F)cc13)N(c14cc(F)cc14)N(c15cc(F)cc15)N(c16cc(F)cc16)N(c17cc(F)cc17)N(c18cc(F)cc18)N(c19cc(F)cc19)N(c20cc(F)cc20)N(c21cc(F)cc21)N(c22cc(F)cc22)N(c23cc(F)cc23)N(c24cc(F)cc24)N(c25cc(F)cc25)N(c26cc(F)cc26)N(c27cc(F)cc27)N(c28cc(F)cc28)N(c29cc(F)cc29)N(c30cc(F)cc30)N(c31cc(F)cc31)N(c32cc(F)cc32)N(c33cc(F)cc33)N(c34cc(F)cc34)N(c35cc(F)cc35)N(c36cc(F)cc36)N(c37cc(F)cc37)N(c38cc(F)cc38)N(c39cc(F)cc39)N(c40cc(F)cc40)N(c41cc(F)cc41)N(c42cc(F)cc42)N(c43cc(F)cc43)N(c44cc(F)cc44)N(c45cc(F)cc45)N(c46cc(F)cc46)N(c47cc(F)cc47)N(c48cc(F)cc48)N(c49cc(F)cc49)N(c50cc(F)cc50)N(c51cc(F)cc51)N(c52cc(F)cc52)N(c53cc(F)cc53)N(c54cc(F)cc54)N(c55cc(F)cc55)N(c56cc(F)cc56)N(c57cc(F)cc57)N(c58cc(F)cc58)N(c59cc(F)cc59)N(c60cc(F)cc60)N(c61cc(F)cc61)N(c62cc(F)cc62)N(c63cc(F)cc63)N(c64cc(F)cc64)N(c65cc(F)cc65)N(c66cc(F)cc66)N(c67cc(F)cc67)N(c68cc(F)cc68)N(c69cc(F)cc69)N(c70cc(F)cc70)N(c71cc(F)cc71)N(c72cc(F)cc72)N(c73cc(F)cc73)N(c74cc(F)cc74)N(c75cc(F)cc75)N(c76cc(F)cc76)N(c77cc(F)cc77)N(c78cc(F)cc78)N(c79cc(F)cc79)N(c80cc(F)cc80)N(c81cc(F)cc81)N(c82cc(F)cc82)N(c83cc(F)cc83)N(c84cc(F)cc84)N(c85cc(F)cc85)N(c86cc(F)cc86)N(c87cc(F)cc87)N(c88cc(F)cc88)N(c89cc(F)cc89)N(c90cc(F)cc90)N(c91cc(F)cc91)N(c92cc(F)cc92)N(c93cc(F)cc93)N(c94cc(F)cc94)N(c95cc(F)cc95)N(c96cc(F)cc96)N(c97cc(F)cc97)N(c98cc(F)cc98)N(c99cc(F)cc99)N(c100cc(F)cc100)N(c101cc(F)cc101)N(c102cc(F)cc102)N(c103cc(F)cc103)N(c104cc(F)cc104)N(c105cc(F)cc105)N(c106cc(F)cc106)N(c107cc(F)cc107)N(c108cc(F)cc108)N(c109cc(F)cc109)N(c110cc(F)cc110)N(c111cc(F)cc111)N(c112cc(F)cc112)N(c113cc(F)cc113)N(c114cc(F)cc114)N(c115cc(F)cc115)N(c116cc(F)cc116)N(c117cc(F)cc117)N(c118cc(F)cc118)N(c119cc(F)cc119)N(c120cc(F)cc120)N(c121cc(F)cc121)N(c122cc(F)cc122)N(c123cc(F)cc123)N(c124cc(F)cc124)N(c125cc(F)cc125)N(c126cc(F)cc126)N(c127cc(F)cc127)N(c128cc(F)cc128)N(c129cc(F)cc129)N(c130cc(F)cc130)N(c131cc(F)cc131)N(c132cc(F)cc132)N(c133cc(F)cc133)N(c134cc(F)cc134)N(c135cc(F)cc135)N(c136cc(F)cc136)N(c137cc(F)cc137)N(c138cc(F)cc138)N(c139cc(F)cc139)N(c140cc(F)cc140)N(c141cc(F)cc141)N(c142cc(F)cc142)N(c143cc(F)cc143)N(c144cc(F)cc144)N(c145cc(F)cc145)N(c146cc(F)cc146)N(c147cc(F)cc147)N(c148cc(F)cc148)N(c149cc(F)cc149)N(c150cc(F)cc150)N(c151cc(F)cc151)N(c152cc(F)cc152)N(c153cc(F)cc153)N(c154cc(F)cc154)N(c155cc(F)cc155)N(c156cc(F)cc156)N(c157cc(F)cc157)N(c158cc(F)cc158)N(c159cc(F)cc159)N(c160cc(F)cc160)N(c161cc(F)cc161)N(c162cc(F)cc162)N(c163cc(F)cc163)N(c164cc(F)cc164)N(c165cc(F)cc165)N(c166cc(F)cc166)N(c167cc(F)cc167)N(c168cc(F)cc168)N(c169cc(F)cc169)N(c170cc(F)cc170)N(c171cc(F)cc171)N(c172cc(F)cc172)N(c173cc(F)cc173)N(c174cc(F)cc174)N(c175cc(F)cc175)N(c176cc(F)cc176)N(c177cc(F)cc177)N(c178cc(F)cc178)N(c179cc(F)cc179)N(c180cc(F)cc180)N(c181cc(F)cc181)N(c182cc(F)cc182)N(c183cc(F)cc183)N(c184cc(F)cc184)N(c185cc(F)cc185)N(c186cc(F)cc186)N(c187cc(F)cc187)N(c188cc(F)cc188)N(c189cc(F)cc189)N(c190cc(F)cc190)N(c191cc(F)cc191)N(c192cc(F)cc192)N(c193cc(F)cc193)N(c194cc(F)cc194)N(c195cc(F)cc195)N(c196cc(F)cc196)N(c197cc(F)cc197)N(c198cc(F)cc198)N(c199cc(F)cc199)N(c200cc(F)cc200)N(c201cc(F)cc201)N(c202cc(F)cc202)N(c203cc(F)cc203)N(c204cc(F)cc204)N(c205cc(F)cc205)N(c206cc(F)cc206)N(c207cc(F)cc207)N(c208cc(F)cc208)N(c209cc(F)cc209)N(c210cc(F)cc210)N(c211cc(F)cc211)N(c212cc(F)cc212)N(c213cc(F)cc213)N(c214cc(F)cc214)N(c215cc(F)cc215)N(c216cc(F)cc216)N(c217cc(F)cc217)N(c218cc(F)cc218)N(c219cc(F)cc219)N(c220cc(F)cc220)N(c221cc(F)cc221)N(c222cc(F)cc222)N(c223cc(F)cc223)N(c224cc(F)cc224)N(c225cc(F)cc225)N(c226cc(F)cc226)N(c227cc(F)cc227)N(c228cc(F)cc228)N(c229cc(F)cc229)N(c230cc(F)cc230)N(c231cc(F)cc231)N(c232cc(F)cc232)N(c233cc(F)cc233)N(c234cc(F)cc234)N(c235cc(F)cc235)N(c236cc(F)cc236)N(c237cc(F)cc237)N(c238cc(F)cc238)N(c239cc(F)cc239)N(c240cc(F)cc240)N(c241cc(F)cc241)N(c242cc(F)cc242)N(c243cc(F)cc243)N(c244cc(F)cc244)N(c245cc(F)cc245)N(c246cc(F)cc246)N(c247cc(F)cc247)N(c248cc(F)cc248)N(c249cc(F)cc249)N(c250cc(F)cc250)N(c251cc(F)cc251)N(c252cc(F)cc252)N(c253cc(F)cc253)N(c254cc(F)cc254)N(c255cc(F)cc255)N(c256cc(F)cc256)N(c257cc(F)cc257)N(c258cc(F)cc258)N(c259cc(F)cc259)N(c260cc(F)cc260)N(c261cc(F)cc261)N(c262cc(F)cc262)N(c263cc(F)cc263)N(c264cc(F)cc264)N(c265cc(F)cc265)N(c266cc(F)cc266)N(c267cc(F)cc267)N(c268cc(F)cc268)N(c269cc(F)cc269)N(c270cc(F)cc270)N(c271cc(F)cc271)N(c272cc(F)cc272)N(c273cc(F)cc273)N(c274cc(F)cc274)N(c275cc(F)cc275)N(c276cc(F)cc276)N(c277cc(F)cc277)N(c278cc(F)cc278)N(c279cc(F)cc279)N(c280cc(F)cc280)N(c281cc(F)cc281)N(c282cc(F)cc282)N(c283cc(F)cc283)N(c284cc(F)cc284)N(c285cc(F)cc285)N(c286cc(F)cc286)N(c287cc(F)cc287)N(c288cc(F)cc288)N(c289cc(F)cc289)N(c290cc(F)cc290)N(c291cc(F)cc291)N(c292cc(F)cc292)N(c293cc(F)cc293)N(c294cc(F)cc294)N(c295cc(F)cc295)N(c296cc(F)cc296)N(c297cc(F)cc297)N(c298cc(F)cc298)N(c299cc(F)cc299)N(c300cc(F)cc300)N(c301cc(F)cc301)N(c302cc(F)cc302)N(c303cc(F)cc303)N(c304cc(F)cc304)N(c305cc(F)cc305)N(c306cc(F)cc306)N(c307cc(F)cc307)N(c308cc(F)cc308)N(c309cc(F)cc309)N(c310cc(F)cc310)N(c311cc(F)cc311)N(c312cc(F)cc312)N(c313cc(F)cc313)N(c314cc(F)cc314)N(c315cc(F)cc315)N(c316cc(F)cc316)N(c317cc(F)cc317)N(c318cc(F)cc318)N(c319cc(F)cc319)N(c320cc(F)cc320)N(c321cc(F)cc321)N(c322cc(F)cc322)N(c323cc(F)cc323)N(c324cc(F)cc324)N(c325cc(F)cc325)N(c326cc(F)cc326)N(c327cc(F)cc327)N(c328cc(F)cc328)N(c329cc(F)cc329)N(c330cc(F)cc330)N(c331cc(F)cc331)N(c332cc(F)cc332)N(c333cc(F)cc333)N(c334cc(F)cc334)N(c335cc(F)cc335)N(c336cc(F)cc336)N(c337cc(F)cc337)N(c338cc(F)cc338)N(c339cc(F)cc339)N(c340cc(F)cc340)N(c341cc(F)cc341)N(c342cc(F)cc342)N(c343cc(F)cc343)N(c344cc(F)cc344)N(c345cc(F)cc345)N(c346cc(F)cc346)N(c347cc(F)cc347)N(c348cc(F)cc348)N(c349cc(F)cc349)N(c350cc(F)cc350)N(c351cc(F)cc351)N(c352cc(F)cc352)N(c353cc(F)cc353)N(c354cc(F)cc354)N(c355cc(F)cc355)N(c356cc(F)cc356)N(c357cc(F)cc357)N(c358cc(F)cc358)N(c359cc(F)cc359)N(c360cc(F)cc360)N(c361cc(F)cc361)N(c362cc(F)cc362)N(c363cc(F)cc363)N(c364cc(F)cc364)N(c365cc(F)cc365)N(c366cc(F)cc366)N(c367cc(F)cc367)N(c368cc(F)cc368)N(c369cc(F)cc369)N(c370cc(F)cc370)N(c371cc(F)cc371)N(c372cc(F)cc372)N(c373cc(F)cc373)N(c374cc(F)cc374)N(c375cc(F)cc375)N(c376cc(F)cc376)N(c377cc(F)cc377)N(c378cc(F)cc378)N(c379cc(F)cc379)N(c380cc(F)cc380)N(c381cc(F)cc381)N(c382cc(F)cc382)N(c383cc(F)cc383)N(c384cc(F)cc384)N(c385cc(F)cc385)N(c386cc(F)cc386)N(c387cc(F)cc387)N(c388cc(F)cc388)N(c389cc(F)cc389)N(c390cc(F)cc390)N(c391cc(F)cc391)N(c392cc(F)cc392)N(c393cc(F)cc393)N(c394cc(F)cc394)N(c395cc(F)cc395)N(c396cc(F)cc396)N(c397cc(F)cc397)N(c398cc(F)cc398)N(c399cc(F)cc399)N(c400cc(F)cc400)N(c401cc(F)cc401)N(c402cc(F)cc402)N(c403cc(F)cc403)N(c404cc(F)cc404)N(c405cc(F)cc405)N(c406cc(F)cc406)N(c407cc(F)cc407)N(c408cc(F)cc408)N(c409cc(F)cc409)N(c410cc(F)cc410)N(c411cc(F)cc411)N(c412cc(F)cc412)N(c413cc(F)cc413)N(c414cc(F)cc414)N(c415cc(F)cc415)N(c416cc(F)cc416)N(c417cc(F)cc417)N(c418cc(F)cc418)N(c419cc(F)cc419)N(c420cc(F)cc420)N(c421cc(F)cc421)N(c422cc(F)cc422)N(c423cc(F)cc423)N(c424cc(F)cc424)N(c425cc(F)cc425)N(c426cc(F)cc426)N(c427cc(F)cc427)N(c428cc(F)cc428)N(c429cc(F)cc429)N(c430cc(F)cc430)N(c431cc(F)cc431)N(c432cc(F)cc432)N(c433cc(F)cc433)N(c434cc(F)cc434)N(c435cc(F)cc435)N(c436cc(F)cc436)N(c437cc(F)cc437)N(c438cc(F)cc438)N(c439cc(F)cc439)N(c440cc(F)cc440)N(c441cc(F)cc441)N(c442cc(F)cc442)N(c443cc(F)cc443)N(c444cc(F)cc444)N(c445cc(F)cc445)N(c446cc(F)cc446)N(c447cc(F)cc447)N(c448cc(F)cc448)N(c449cc(F)cc449)N(c450cc(F)cc450)N(c451cc(F)cc451)N(c452cc(F)cc452)N(c453cc(F)cc453)N(c454cc(F)cc454)N(c455cc(F)cc455)N(c456cc(F)cc456)N(c457cc(F)cc457)N(c458cc(F)cc458)N(c459cc(F)cc459)N(c460cc(F)cc460)N(c461cc(F)cc461)N(c462cc(F)cc462)N(c463cc(F)cc463)N(c464cc(F)cc464)N(c465cc(F)cc465)N(c466cc(F)cc466)N(c467cc(F)cc467)N(c468cc(F)cc468)N(c469cc(F)cc469)N(c470cc(F)cc470)N(c471cc(F)cc471)N(c472cc(F)cc472)N(c473cc(F)cc473)N(c474cc(F)cc474)N(c475cc(F)cc475)N(c476cc(F)cc476)N(c477cc(F)cc477)N(c478cc(F)cc478)N(c479cc(F)cc479)N(c480cc(F)cc480)N(c481cc(F)cc481)N(c482cc(F)cc482)N(c483cc(F)cc483)N(c484cc(F)cc484)N(c485cc(F)cc485)N(c486cc(F)cc486)N(c487cc(F)cc487)N(c488cc(F)cc488)N(c489cc(F)cc489)N(c490cc(F)cc490)N(c491cc(F)cc491)N(c492cc(F)cc492)N(c493cc(F)cc493)N(c494cc(F)cc494)N(c495cc(F)cc495)N(c496cc(F)cc496)N(c497cc(F)cc497)N(c498cc(F)cc498)N(c499cc(F)cc499)N(c500cc(F)cc500)N(c501cc(F)cc501)N(c502cc(F)cc502)N(c503cc(F)cc503)N(c504cc(F)cc504)N(c505cc(F)cc505)N(c506cc(F)cc506)N(c507cc(F)cc507)N(c508cc(F)cc508)N(c509cc(F)cc509)N(c510cc(F)cc510)N(c511cc(F)cc511)N(c512cc(F)cc512)N(c513cc(F)cc513)N(c514cc(F)cc514)N(c515cc(F)cc515)N(c516cc(F)cc516)N(c517cc(F)cc517)N(c518cc(F)cc518)N(c519cc(F)cc519)N(c520cc(F)cc520)N(c521cc(F)cc521)N(c522cc(F)cc522)N(c523cc(F)cc523)N(c524cc(F)cc524)N(c525cc(F)cc525)N(c526cc(F)cc526)N(c527cc(F)cc527)N(c528cc(F)cc528)N(c529cc(F)cc529)N(c530cc(F)cc530)N(c531cc(F)cc531)N(c532cc(F)cc532)N(c533cc(F)cc533)N(c534cc(F)cc534)N(c535cc(F)cc535)N(c536cc(F)cc536)N(c537cc(F)cc537)N(c538cc(F)cc538)N(c539cc(F)cc539)N(c540cc(F)cc540)N(c541cc(F)cc541)N(c542cc(F)cc542)N(c543cc(F)cc543)N(c544cc(F)cc544)N(c545cc(F)cc545)N(c546cc(F)cc546)N(c547cc(F)cc547)N(c548cc(F)cc548)N(c549cc(F)cc549)N(c550cc(F)cc550)N(c551cc(F)cc551)N(c552cc(F)cc552)N(c553cc(F)cc553)N(c554cc(F)cc554)N(c555cc(F)cc555)N(c556cc(F)cc556)N(c557cc(F)cc557)N(c558cc(F)cc558)N(c559cc(F)cc559)N(c560cc(F)cc560)N(c561cc(F)cc561)N(c562cc(F)cc562)N(c563cc(F)cc563)N(c564cc(F)cc564)N(c565cc(F)cc565)N(c566cc(F)cc566)N(c567cc(F)cc567)N(c568cc(F)cc568)N(c569cc(F)cc569)N(c570cc(F)cc570)N(c571cc(F)cc571)N(c572cc(F)cc572)N(c573cc(F)cc573)N(c574cc(F)cc574)N(c575cc(F)cc575)N(c576cc(F)cc576)N(c577cc(F)cc577)N(c578cc(F)cc578)N(c579cc(F)cc579)N(c580cc(F)cc580)N(c581cc(F)cc581)N(c582cc(F)cc582)N(c583cc(F)cc583)N(c584cc(F)cc584)N(c585cc(F)cc585)N(c586cc(F)cc586)N(c587cc(F)cc587)N(c588cc(F)cc588)N(c589cc(F)cc589)N(c590cc(F)cc590)N(c591cc(F)cc591)N(c592cc(F)cc592)N(c593cc(F)cc593)N(c594cc(F)cc594)N(c595cc(F)cc595)N(c596cc(F)cc596)N(c597cc(F)cc597)N(c598cc(F)cc598)N(c599cc(F)cc599)N(c600cc(F)cc600)N(c601cc(F)cc601)N(c602cc(F)cc602)N(c603cc(F)cc603)N(c604cc(F)cc604)N(c605cc(F)cc605)N(c606cc(F)cc606)N(c607cc(F)cc607)N(c608cc(F)cc608)N(c609cc(F)cc609)N(c610cc(F)cc610)N(c611cc(F)cc611)N(c612cc(F)cc612)N(c613cc(F)cc613)N(c614cc(F)cc614)N(c615cc(F)cc615)N(c616cc(F)cc616)N(c617cc(F)cc617)N(c618cc(F)cc618)N(c619cc(F)cc619)N(c620cc(F)cc620)N(c621cc(F)cc621)N(c622cc(F)cc622)N(c623cc(F)cc623)N(c624cc(F)cc624)N(c625cc(F)cc625)N(c626cc(F)cc626)N(c627cc(F)cc627)N(c628cc(F)cc628)N(c629cc(F)cc629)N(c630cc(F)cc630)N(c631cc(F)cc631)N(c632cc(F)cc632)N(c633cc(F)cc633)N(c634cc(F)cc634)N(c635cc(F)cc635)N(c636cc(F)cc636)N(c637cc(F)cc637)N(c638cc(F)cc638)N(c639cc(F)cc639)N(c640cc(F)cc640)N(c641cc(F)cc641)N(c642cc(F)cc642)N(c643cc(F)cc643)N(c644cc(F)cc644)N(c645cc(F)cc645)N(c646cc(F)cc646)N(c647cc(F)cc647)N(c648cc(F)cc648)N(c649cc(F)cc649)N(c650cc(F)cc650)N(c651cc(F)cc651)N(c652cc(F)cc652)N(c653cc(F)cc653)N(c654cc(F)cc654)N(c655cc(F)cc655)N(c656cc(F)cc656)N(c657cc(F)cc657)N(c658cc(F)cc658)N(c659cc(F)cc659)N(c660cc(F)cc660)N(c661cc(F)cc661)N(c662cc(F)cc662)N(c663cc(F)cc663)N(c664cc(F)cc664)N(c665cc(F)cc665)N(c666cc(F)cc666)N(c667cc(F)cc667)N(c668cc(F)cc668)N(c669cc(F)cc669)N(c670cc(F)cc670)N(c671cc(F)cc671)N(c672cc(F)cc672)N(c673cc(F)cc673)N(c674cc(F)cc674)N(c675cc(F)cc675)N(c676cc(F)cc676)N(c677cc(F)cc677)N(c678cc(F)cc678)N(c679cc(F)cc679)N(c680cc(F)cc680)N(c681cc(F)cc681)N(c682cc(F)cc682)N(c683cc(F)cc683)N(c684cc(F)cc684)N(c685cc(F)cc685)N(c686cc(F)cc686)N(c687cc(F)cc687)N(c688cc(F)cc688)N(c689cc(F)cc689)N(c690cc(F)cc690)N(c691cc(F)cc691)N(c692cc(F)cc692)N(c693cc(F)cc693)N(c694cc(F)cc694)N(c695cc(F)cc695)N(c696cc(F)cc696)N(c697cc(F)cc697)N(c698cc(F)cc698)N(c699cc(F)cc699)N(c700cc(F)cc700)N(c701cc(F)cc701)N(c702cc(F)cc702)N(c703cc(F)cc703)N(c704cc(F)cc704)N(c705cc(F)cc705)N(c706cc(F)cc706)N(c707cc(F)cc707)N(c708cc(F)cc708)N(c709cc(F)cc709)N(c710cc(F)cc710)N(c711cc(F)cc711)N(c712cc(F)cc712)N(c713cc(F)cc713)N(c714cc(F)cc714)N(c715cc(F)cc715)N(c716cc(F)cc716)N(c717cc(F)cc717)N(c718cc(F)cc718)N(c719cc(F)cc719)N(c720cc(F)cc720)N(c721cc(F)cc721)N(c722cc(F)cc722)N(c723cc(F)cc723)N(c724cc(F)cc724)N(c725cc(F)cc725)N(c726cc(F)cc726)N(c727cc(F)cc727)N(c728cc(F)cc728)N(c729cc(F)cc729)N(c730cc(F)cc730)N(c731cc(F)cc731)N(c732cc(F)cc732)N(c733cc(F)cc733)N(c734cc(F)cc734)N(c735cc(F)cc735)N(c736cc(F)cc736)N(c737cc(F)cc737)N(c738cc(F)cc738)N(c739cc(F)cc739)N(c740cc(F)cc740)N(c741cc(F)cc741)N(c742cc(F)cc742)N(c743cc(F)cc743)N(c744cc(F)cc744)N(c745cc(F)cc745)N(c746cc(F)cc746)N(c747cc(F)cc747)N(c748cc(F)cc748)N(c749cc(F)cc749)N(c750cc(F)cc750)N(c751cc(F)cc751)N(c752cc(F)cc752)N(c753cc(F)cc753)N(c754cc(F)cc754)N(c755cc(F)cc755)N(c756cc(F)cc756)N(c757cc(F)cc757)N(c758cc(F)cc758)N(c759cc(F)cc759)N(c760cc(F)cc760)N(c761cc(F)cc761)N(c762cc(F)cc762)N(c763cc(F)cc763)N(c764cc(F)cc764)N(c765cc(F)cc765)N(c766cc(F)cc766)N(c767cc(F)cc767)N(c768cc(F)cc768)N(c769cc(F)cc769)N(c770cc(F)cc770)N(c771cc(F)cc771)N(c772cc(F)cc772)N(c773cc(F)cc773)N(c774cc(F)cc774)N(c775cc(F)cc775)N(c776cc(F)cc776)N(c777cc(F)cc777)N(c778cc(F)cc778)N(c779cc(F)cc779)N(c780cc(F)cc780)N(c781cc(F)cc781)N(c782cc(F)cc782)N(c783cc(F)cc783)N(c784cc(F)cc784)N(c785cc(F)cc785)N(c786cc(F)cc786)N(c787cc(F)cc787)N(c788cc(F)cc788)N(c789cc(F)cc789)N(c790cc(F)cc790)N(c791cc(F)cc791)N(c792cc(F)cc792)N(c793cc(F)cc793)N(c794cc(F)cc794)N(c795cc(F)cc795)N(c796cc(F)cc796)N(c797cc(F)cc797)N(c798cc(F)cc798)N(c799cc(F)cc799)N(c800cc(F)cc800)N(c801cc(F)cc801)N(c802cc(F)cc802)N(c803cc(F)cc803)N(c804cc(F)cc804)N(c805cc(F)cc805)N(c806cc(F)cc806)N(c807cc |       |                            |
